# Supplementary material for: Staff experiences of enhanced recovery after surgery: systematic review of qualitative studies
Source: PubMed Central journal article supplement (PMC6377558; doi:10.1136/bmjopen-2018-022259), 2019-02-12
Supplement: bmjopen-2018-022259.draft_revisions.pdf [file bmjopen-2018-022259.draft_revisions.pdf]

# BMJ Open

BMJ Open is committed to open peer review. As part of this commitment we make the peer review history of every article we publish publicly available.

When an article is published we post the peer reviewers' comments and the authors' responses online. We also post the versions of the paper that were used during peer review. These are the versions that the peer review comments apply to.

The versions of the paper that follow are the versions that were submitted during the peer review process. They are not the versions of record or the final published versions. They should not be cited or distributed as the published version of this manuscript.

BMJ Open is an open access journal and the full, final, typeset and author-corrected version of record of the manuscript is available on our site with no access controls, subscription charges or pay-per-view fees (<http://bmjopen.bmj.com>).

If you have any questions on BMJ Open's open peer review process please email [info.bmjopen@bmj.com](mailto:info.bmjopen@bmj.com)

# BMJ Open

## Staff Experiences of Enhanced Recovery after Surgery – Systematic Review of Qualitative Studies

|                               |                                                                                                                                                          |
|-------------------------------|----------------------------------------------------------------------------------------------------------------------------------------------------------|
| Journal:                      | <i>BMJ Open</i>                                                                                                                                          |
| Manuscript ID                 | bmjopen-2018-022259                                                                                                                                      |
| Article Type:                 | Research                                                                                                                                                 |
| Date Submitted by the Author: | 23-Feb-2018                                                                                                                                              |
| Complete List of Authors:     | Cohen, Rachel; University of Bristol, School of Population Health Sciences<br>Goberman-Hill, Rachael; University of Bristol, School of Clinical Sciences |
| Keywords:                     | Enhanced recovery, Qualitative, Joint replacement                                                                                                        |
|                               |                                                                                                                                                          |

SCHOLARONE™  
Manuscripts

view only

1  
2  
3 **Article Title: STAFF EXPERIENCES OF ENHANCED RECOVERY AFTER SURGERY – SYSTEMATIC**  
4 **REVIEW OF QUALITATIVE STUDIES**  
5

6  
7 **Authors:** #Dr Rachel Cohen and Professor Rachael Goberman-Hill\*  
8  
9

10  
11  
12 **\*Corresponding author:** Dr Rachel Cohen, Centre for Academic Mental Health, Department  
13  
14 of Population Health Sciences, Bristol Medical School, University of Bristol, Bristol, BS8 2BN, UK  
15

16  
17 **Corresponding author's Email address:** rachel.cohen@bristol.ac.uk Tel: +44(0)117 331 4007  
18

19  
20 **#Co-author:** Professor Rachael Goberman-Hill, Professor of Health and Anthropology,  
21  
22 Translational Health Sciences, Bristol Medical School, University of Bristol, Learning and Research  
23  
24 Building, Level 1, Southmead Hospital, Bristol BS10 5NB, UK  
25

26  
27  
28  
29 **Word count:** 4194  
30

31  
32  
33  
34  
35 **Keywords:** Enhanced Recovery, qualitative, joint replacement  
36  
37  
38  
39  
40  
41  
42  
43  
44  
45  
46  
47  
48  
49  
50  
51  
52  
53  
54  
55  
56  
57  
58  
59  
60

**ABSTRACT**

**Objective:** To conduct a systematic review of qualitative studies which explore health professionals' experiences of and perspectives on the enhanced recovery after surgery (ERAS) pathway.

**Design:** Systematic review of qualitative literature using a qualitative content analysis.

**Setting:** Secondary care, including a wide range of hospital settings.

**Participants:** Health professionals including a wide range of Multidisciplinary Team and Allied Health Professional staff to incorporate a diverse range of clinical and professional perspectives.

**Results:** Eight studies were included in the review. These studies focus on the implementation and delivery of ERAS across a range of clinical contexts, including colorectal surgery, gastrointestinal surgery, abdominal hysterectomy, and orthopaedics. Health professionals participating in the studies include registrars, consultants, surgeons, anaesthetists, doctors, nurses and physiotherapists, nursing managers, ERAS coordinators and champions, care coordinators and service improvement coordinators. Five main themes emerged in the analysis: communication and collaboration, resistance to change, role and significance of protocol-based care, knowledge and expectations, and temporality. Professionals described the importance of effective multidisciplinary team collaboration and communication, providing thorough education to staff and patients, and appointing a dedicated champion as means to implement and integrate ERAS pathways successfully. Evidence based protocol based guidelines were thought to be useful for improvements to patient care by standardising practices and reducing treatment variations, but were thought to be too open to interpretation at local levels. Setting and managing 'realistic' expectations of staff was seen as a priority. Staff attitudes towards ERAS tend to become more favourable over time, as practices become successfully 'normalised'.

**Conclusions:** Staff feel positive about the implementation of ERAS, but acknowledge that the process is complex and challenging. Many of the challenges identified, such as resistance to change and lack of confidence can however be mitigated by ensuring that multidisciplinary teams understand ERAS principles and guidelines, and that they communicate well with one another and

1  
2  
3 with patients. We suggest that the provision of comprehensive, coherent and locally relevant  
4  
5 information to health professionals. Identifying and recruiting local ERAS champions would help to  
6  
7 improve the implementation and delivery of ERAS pathways.  
8  
9

## 10 11 **ARTICLE SUMMARY**

### 12 13 **Strengths and limitations of this study**

- 14  
15
- 16 • There are few existing systematic reviews of qualitative studies on staff experiences of ERAS
- 17
- 18 • The review includes studies with a diverse range of populations, contexts and
- 19  
20 methodological approaches
- 21
- 22 • The review includes a small number of studies, reducing its transferability
- 23  
24  
25  
26  
27  
28  
29  
30  
31  
32  
33  
34  
35  
36  
37  
38  
39  
40  
41  
42  
43  
44  
45  
46  
47  
48  
49  
50  
51  
52  
53  
54  
55  
56  
57  
58  
59  
60

## INTRODUCTION

Enhanced recovery after surgery (ERAS) programmes were introduced and began to be implemented in the late 1990s[1], as part of an initiative towards reducing variations in patient care and improving quality standards[2]. Building upon their Danish origins, ERAS programmes have been internationally adopted, and widely implemented for major elective surgical pathways in colorectal surgery, orthopaedics, gynaecology, cardiology and urology. Depending upon the kind of diagnostic and surgical care in question, ERAS programmes are sometimes referred to using different names, including 'fast-track surgery', 'rapid recovery', 'accelerated discharge' or 'early discharge'.

The aim of ERAS pathways is to reduce length of hospital stay and lessen readmissions, minimise surgical complications, decrease morbidity, and improve cost effectiveness. Best described as a complex intervention[3,4], ERAS seeks to improve patient experiences and outcomes by focusing on key aspects of the care pathway, pre-, peri- and post operatively, as a means of reducing physiological and psychological stress. This involves the provision of better education and information for patients prior to their operations, the use of minimally invasive surgical techniques and anaesthesia, optimal pain management and early post-operative mobilisation, as well as the preparation of a discharge plan[5].

Despite their protocol-based foundations, evidence from recent studies indicates that ERAS pathways are implemented variably across different hospital settings. More information is needed about what the core active ingredients of ERAS are. We also need to know more about how these ingredients exert their effect according to local circumstances, and about how they shape (and are shaped by) the context of their implementation[4,6]. Existing literature has drawn particular attention to the factors which help, and those which hinder, the successful implementation of ERAS, identifying important barriers and facilitators to the process. Barriers include resistance to change, inadequate funding, lack of support from management, high staff turnover, poor documentation,

1  
2  
3 and shortness of time, whilst facilitators included a dedicated enhanced recovery lead, effective  
4 multidisciplinary team working and ongoing education for staff and patients[7].  
5  
6  
7

8  
9 Patient experiences of and satisfaction with ERAS pathways have been studied using both  
10 quantitative and qualitative approaches: the latter have been especially useful in improving  
11 understandings of patient experiences and perspectives e.g.[8-13]. Sibbern et al's[14] systematic  
12 review of such studies provides a comprehensive discussion of existing qualitative research on this  
13 specific topic. Health professionals' satisfaction with and perspectives on ERAS, meanwhile, have  
14 typically been explored using quantitative approaches. Information regarding the experiences of  
15 health professionals in this context is needed to inform ongoing healthcare policy and practice.  
16  
17  
18  
19  
20  
21  
22  
23  
24  
25

26 This article describes a systematic review of qualitative studies of health professionals' experiences  
27 of ERAS pathways. By synthesising existing research the review aims to identify overarching themes  
28 that provide opportunities for improving implementation and practice.  
29  
30  
31  
32  
33

## 34 **METHODS**

### 35 **Patient and Public Involvement**

36 This paper is a systematic review of qualitative studies. No patients were involved in the review.  
37  
38  
39  
40  
41  
42

43 Our systematic review was registered on PROSPERO in 2017: the registration number is  
44 CRD42017059952. The review sought to describe the experiences and perspectives of healthcare  
45 professionals involved in delivering enhanced recovery pathways.  
46  
47  
48  
49  
50

51 We used methods of systematic search and review and conducted a search of PsychINFO, Medline,  
52 Cinahl, and PubMed to identify relevant qualitative studies across a range of health care contexts.  
53  
54

55 For all of the databases, the search terms used were:  
56  
57

1  
2  
3  
4  
5 ERAS OR enhanced recovery OR fast-track OR accelerated recovery OR rapid recovery  
6  
7 OR early discharge OR patients discharge OR enhance\* recov\* after surg\*  
8  
9 Staff perspective OR staff experience\* OR staff perception\* OR ward staff OR nurs\* OR  
10  
11 professional\*  
12  
13 Qualitative OR interview\* OR ethnograph\* OR observation  
14  
15

16  
17 The reference lists of articles identified from the database search were also scrutinised for possible  
18  
19 additional studies.  
20  
21

22  
23  
24 As shown in the PRISMA flowchart (supplementary file), the database searches yielded 1201 articles  
25  
26 in total. In addition, through searching the reference lists of the included studies, we identified five  
27  
28 further records. Eleven studies met the inclusion criteria, and were assessed for eligibility using the  
29  
30 Critical Appraisal Skills Programme (CASP) guidance (Critical Skills Appraisal Programme 2017)[15].  
31

32 The CASP tool for systematic reviews provides a means of identifying the strengths and weaknesses  
33  
34 of research articles, assessing their usefulness and validity, and their relevance for inclusion in the  
35  
36 review. After considering the ten CASP domains – aim, methodology, design, recruitment strategy,  
37  
38 data collection, relationship between researcher and participants, ethical issues, data analysis,  
39  
40 findings and research value - three studies were excluded, and the remaining eight were included.  
41

42 Two of the three that were excluded at this stage were quantitative rather than qualitative, and one  
43  
44 focused on rehabilitation following hip and knee arthroplasty, but not specifically on ERAS. The two  
45  
46 authors independently conducted quality assessment and agreed that all eight articles addressed all  
47  
48 ten CASP criteria and were of sufficient rigour and relevance for inclusion in the review.  
49

50  
51  
52  
53 After completion of quality assessment we conducted a qualitative meta-synthesis of the eight  
54  
55 eligible articles. This comprised close reading and extraction of key findings using descriptive  
56  
57



1  
2  
3 qualitative design[16], and a qualitative content analysis[17,18]. For the analysis, we focused on the  
4  
5 manifest content of the articles, i.e. what the texts say[17]. This involved searching for the common  
6  
7 concepts and themes[18] addressed in the articles regarding health professionals' experiences of  
8  
9 and perspectives on ERAS. Supporting quotes were also gathered. This enabled us to develop  
10  
11 meaning units, extracted from the findings of the studies. These were then condensed into content  
12  
13 related categories, which the authors discussed and agreed upon. We then synthesised the chosen  
14  
15 categories into themes as shown in Table 1.  
16

**TABLE 1****Theme 1: Collaboration and communication**

| <b>MEANING UNITS</b>                                                                                                                                                                                              | <b>CONTENT RELATED CATEGORIES</b>                                                                                                                                                                                                                      |
|-------------------------------------------------------------------------------------------------------------------------------------------------------------------------------------------------------------------|--------------------------------------------------------------------------------------------------------------------------------------------------------------------------------------------------------------------------------------------------------|
| Staff find the information-rich nature of ERAS confusing. Many staff feel that they do not understand it well enough and/or that they have not received sufficiently clear or consistent information or training. | Providing staff and their patients with a comprehensive education about and introduction to ERAS improves understanding and helps to mitigate confusion.                                                                                               |
| Information about ERAS is not always disseminated between staff – and between staff and patients – in a coherent and consistent way.                                                                              | Strong team communications help to ensure the effective dissemination of information                                                                                                                                                                   |
| Collaborative MDT work is hindered by high staff turnover and a lack of coordination across different departments.                                                                                                | Building good relationships within the MDT helps to encourage dialogue between staff, and to improve their willingness and ability to collaborate. The appointment of a dedicated ERAS 'champion' improves staff engagement and collaborative working, |

**Theme 2: Resistance to change**

| MEANING UNITS                                                                                                                                                                                                                                              | CONTENT RELATED CATEGORIES                                                            |
|------------------------------------------------------------------------------------------------------------------------------------------------------------------------------------------------------------------------------------------------------------|---------------------------------------------------------------------------------------|
| Staff are reluctant to implement or engage with new and unfamiliar working practices. Some staff – especially those who are older, or more well established in their role – tend to dislike change more generally and are disinclined to engage with ERAS. | Appointing an ERAS champion helps to encourage more positive attitudes amongst staff. |

### **THEME 3: Role and significance of protocol-based care**

| MEANING UNITS                                                                                                                                                                                        | CONTENT RELATED CATEGORIES                                                                                                                                     |
|------------------------------------------------------------------------------------------------------------------------------------------------------------------------------------------------------|----------------------------------------------------------------------------------------------------------------------------------------------------------------|
| Staff recognise the usefulness of evidence-based protocol guidelines as a means of reducing variations and standardising practice, but have mixed feelings about whether ERAS facilitates this well. | The incorporation of standardised order sets and basing ERAS practices on best evidence increases staff willingness to implement it as a complex intervention. |
| ERAS is not definitively prescriptive, and therefore allows for too much variability in local implementation.                                                                                        | Having a local ERAS champion helps to improve consistency in implementing and operationalising the pathway into existing systems at local sites.               |
| Some staff feel conflicted about having to compromise their capacity for and confidence in providing individualised care for patients.                                                               | Clearer guidance about when it is acceptable to deviate from ERAS protocols would improve staff confidence.                                                    |

### **THEME 4: Knowledge and Expectations**

| MEANING UNIT                                                                                              | CONTENT RELATED CATEGORY                                                                                                                   |
|-----------------------------------------------------------------------------------------------------------|--------------------------------------------------------------------------------------------------------------------------------------------|
| Staff feel that they need a broader knowledge and understanding of ERAS, i.e. beyond protocol guidelines. | Belief in the value and potential positive impact of ERAS improves the willingness of staff to engage with the pathway and its guidelines. |
| Staff are sceptical about the usefulness and value                                                        | Staff feel more positive about and favourable                                                                                              |

|                                                                                                                                                                                                                                                                                                                                                   |                                                                                                                    |
|---------------------------------------------------------------------------------------------------------------------------------------------------------------------------------------------------------------------------------------------------------------------------------------------------------------------------------------------------|--------------------------------------------------------------------------------------------------------------------|
| of ERAS prior to its implementation.                                                                                                                                                                                                                                                                                                              | towards ERAS when they have seen it work successfully in practice.                                                 |
| Managing the expectations of staff and patients is recognised as being crucial to the successful implementation of ERAS. Differing professional perspectives, which are sometimes based on incorrect assumptions, can create ambivalence and uncertainty amongst staff. Staff use tacit knowledge and a “common sense” approach to overcome this. | Setting clear and realistic expectations about ERAS helps to improve staff and patient experiences of the pathway. |

#### **THEME 5: Temporality**

| <b>MEANING UNIT</b>                                                       | <b>CONTENT RELATED CATEGORY</b>                                                                                                                                                                                                                                       |
|---------------------------------------------------------------------------|-----------------------------------------------------------------------------------------------------------------------------------------------------------------------------------------------------------------------------------------------------------------------|
| The successful implementation and embedding of ERAS is a gradual process. | ERAS becomes “normalised” over time, and staff attitudes towards the pathway tend to become more positive. There are ongoing challenges with a lack of available resources (financial and administrative) that are necessary to successfully maintain ERAS over time. |

## FINDINGS

The eight studies included were conducted in the UK (n = 1), US (n = 1), Canada (n = 2), Denmark (n = 2), and Australia (n = 1) (Table 2).

**TABLE 2**

| CITATION                                                                                                                                                                                                                                                                                                         | Study design and key findings                                                                                                                                                                                                                                                                                                                                                                                                                                                                                                                                                                                                 |
|------------------------------------------------------------------------------------------------------------------------------------------------------------------------------------------------------------------------------------------------------------------------------------------------------------------|-------------------------------------------------------------------------------------------------------------------------------------------------------------------------------------------------------------------------------------------------------------------------------------------------------------------------------------------------------------------------------------------------------------------------------------------------------------------------------------------------------------------------------------------------------------------------------------------------------------------------------|
| Alawadi, Z.M., Leal, I., Phatak, U.R., Flores-Gonzalez, J.R., Holihan, J.L., Karanjawala, B.E., Millas, S.G. and Kao, L.S. (2016) Facilitators and barriers of implementing enhanced recovery in colorectal surgery at a safety net hospital: A provider and patient perspective. <i>Surgery</i> 159(3), 700-712 | <ul style="list-style-type: none"> <li>• Qualitative interviews with MDT hospital staff and patients: 'key stakeholders involved in receiving and implementing an ERAS pathway' (2016: 702)</li> <li>• ERAS for colorectal surgery: study conducted in US</li> <li>• Staff identified 5 facilitators and 5 barriers; patients identified 4 facilitators and 3 barriers</li> <li>• Conclusion: 'Although limited hospital resources are perceived as a barrier to ERAS implementation... there is strong support for such pathways and multiple factors were identified that may facilitate change' (2016: 700)</li> </ul>     |
| Sjetne, I.S., Krogstad, U., Odegard, S. and Engh, M.E. (2009) Improving quality by introducing enhanced recovery after surgery in a gynaecological department: consequences for ward nursing practice. <i>Quality and Safety in Healthcare</i> , 18: 236-240                                                     | <ul style="list-style-type: none"> <li>• Qualitative interviews with patients and nurses – four nurses were informants in a total of nine interviews</li> <li>• ERAS for gynaecological surgery – study conducted in Norway</li> <li>• Conclusion: 'expected clinical gains achieved by introducing ERAS are achieved without compromising the work environment of ward nurses' (2009: 239)</li> </ul>                                                                                                                                                                                                                        |
| Pearsall, E.A., Meghiji, A., Pitzul, K.B., Aarts, M., McKenzie, M., McLeod, R.S. and Okrainec, A. (2015) A Qualitative Study to Understand the Barriers and Enablers in Implementing an Enhanced Recovery After Surgery Program. <i>Annals of Surgery</i> 261(1): 92-96                                          | <ul style="list-style-type: none"> <li>• Qualitative interviews with general surgeons, anaesthesiologists and ward nurses</li> <li>• ERAS for colorectal surgery – study conducted in Canada</li> <li>• Focus on perioperative care</li> <li>• Useful paper because it breaks results down into overall, intervention-specific and discipline-specific barriers and enablers, giving a rich multidisciplinary perspective</li> <li>• Conclusion: 'participants supported the need for implementation of an ERAS program... [but] felt there remained major barriers to [its] successful implementation' (2015: 96)</li> </ul> |

|                                                                                                                                                                                                                                                                                   |                                                                                                                                                                                                                                                                                                                                                                                                                                                                                                                                                                                                                                                                                                                                                                                                                 |
|-----------------------------------------------------------------------------------------------------------------------------------------------------------------------------------------------------------------------------------------------------------------------------------|-----------------------------------------------------------------------------------------------------------------------------------------------------------------------------------------------------------------------------------------------------------------------------------------------------------------------------------------------------------------------------------------------------------------------------------------------------------------------------------------------------------------------------------------------------------------------------------------------------------------------------------------------------------------------------------------------------------------------------------------------------------------------------------------------------------------|
| <p>Wagner, L., Carlsund, A.M., Moller, C. and Ottesen, B. (2004) Patient and staff (doctors and nurses) experiences of abdominal hysterectomy in accelerated recovery programme: A qualitative study. <i>Danish Medical Bulletin</i> 51(4): 418-421</p>                           | <ul style="list-style-type: none"> <li>• Qualitative individual interviews and focus groups with staff, observation of and interviews with patients</li> <li>• Accelerated recovery for abdominal hysterectomy – study conducted in Denmark</li> <li>• Useful study because it explores staff experiences with (i) changes in care, (ii) staff perspectives on implementation and (iii) comparisons/contrasts between staff and patient expectations</li> <li>• Conclusion: patients underwent ARP without significant problems, but identified a need for greater psychological support. Staff data showed a positive change in opinion and an understanding of ARP. Recommendations made for better information to be provided to staff and patients, in consultation rooms and outpatient clinics</li> </ul> |
| <p>Jeff, A. and Taylor, C. (2014) Ward nurses' experience of enhanced recovery after surgery: a grounded theory approach. <i>Gastrointestinal Nursing</i> 12(4): 23-31</p>                                                                                                        | <ul style="list-style-type: none"> <li>• Qualitative interviews with 8 ward nurses (4 'experienced' and 4 'newer' to ERAS), as well as documentary evidence using memos and a reflective journal</li> <li>• ERAS for gastrointestinal surgery – study conducted in the UK</li> <li>• Focus on postoperative care</li> <li>• Conclusion: 'the central difficulty experienced by nurses was trying to adapt the protocol to the demands of patient care delivery within the constraints of their role and organisational culture' (2014: 31)</li> </ul>                                                                                                                                                                                                                                                           |
| <p>Gotlib Conn, L., McKenzie, M., Pearsall, E.A. and McLeod, R.S. (2015) Successful implementation of an enhanced recovery after surgery programme for elective colorectal surgery: a process evaluation of champions' experiences. <i>Implementation Science</i> 10(1): 1-11</p> | <ul style="list-style-type: none"> <li>• Process evaluation: qualitative interviews with implementation champions, including surgeons, anaesthesiologists, nurses and project coordinators. 15 participating hospitals</li> <li>• ERAS for elective colorectal surgery – study conducted in Ontario</li> <li>• Paper is useful because it is a qualitative process evaluation, and uses Normalisation Process Theory for data analysis</li> <li>• Conclusion: successful implementation of ERAS is achieved by a 'complex series of cognitive and social processes... [the study demonstrates the importance of] champion coherence, external and internal relationship building, and the strategic management of a project's organisation-level visibility' (2015: 1)</li> </ul>                               |
| <p>Lyon, A., Solomon, M.J., and Harrison, J.D. (2014) A Qualitative Study Assessing the Barriers to Implementation of Enhanced Recovery After Surgery. <i>World Journal of Surgery</i> 38: 1374-1380</p>                                                                          | <ul style="list-style-type: none"> <li>• Includes in-depth, semi-structured interviews with staff including consultants, surgeons, nurses, physiotherapists, care coordinators and medical administrators</li> <li>• ERAS for colorectal surgery – study conducted in Sydney</li> <li>• Paper is useful because it focuses on the reasons behind compliance issues in ERAS, and assesses these qualitatively. It also recognises that understanding the views of a range of MDT staff is important</li> <li>• Study shows that there are four key areas that present barriers to successful ERAS implementation: (i) patient-</li> </ul>                                                                                                                                                                        |

|                                                                                                                                                                                                                                                                                                   |                                                                                                                                                                                                                                                                                                                                                                                                                                                                                                                                                                                                                                                                                                                                |
|---------------------------------------------------------------------------------------------------------------------------------------------------------------------------------------------------------------------------------------------------------------------------------------------------|--------------------------------------------------------------------------------------------------------------------------------------------------------------------------------------------------------------------------------------------------------------------------------------------------------------------------------------------------------------------------------------------------------------------------------------------------------------------------------------------------------------------------------------------------------------------------------------------------------------------------------------------------------------------------------------------------------------------------------|
|                                                                                                                                                                                                                                                                                                   | <p>related factors, (ii) staff-related factors, (iii) practice-related issues and (iv) resources. Paper provides a very comprehensive discussion of these themes</p> <ul style="list-style-type: none"> <li>• Conclusion: for ERAS to be implemented successfully and function efficiently with high levels of compliance, these key areas need to be addressed (ideally) before launching an ERAS programme, and then carefully managed throughout</li> </ul>                                                                                                                                                                                                                                                                 |
| <p>Berthelsen, C.B. and Frederiksen, K. (2017). Orchestrating care through the fast track perspective: A qualitative content analysis of the provision of individualised nursing care in orthopaedic fast-track programmes. International Journal of Orthopaedic and Trauma Nursing 24: 40-49</p> | <ul style="list-style-type: none"> <li>• Includes semi-structured interviews with orthopaedic nursing staff</li> <li>• Fast-track programmes for orthopaedic surgery (hip and knee replacement): study conducted in Denmark</li> <li>• Focus on identifying and individual care needs and legitimising these within a fast-track programme, in order to legitimise them within fast-track nursing practices</li> <li>• Impact of having to compromise nursing care in order to comply with the fast-track programme</li> <li>• Conclusion: nurses felt they had to compromise their nursing care and ethics in order to comply with the fast-track programme and implement the standardised care that it recommends</li> </ul> |

One study was conducted in Canada and the US (n = 1). The sample sizes ranged from 8 to 63. The studies focus on the implementation and delivery of ERAS across a variety of clinical contexts: four on colorectal surgery[19-22], one on gastrointestinal surgery[23], one on abdominal hysterectomy[24], and two on orthopaedics[25]. Participants included in the studies were a wide range of Multidisciplinary Team and Allied Health Professional staff, and therefore incorporate a diverse range of clinical and professional perspectives. These include registrars, consultants, surgeons, anaesthetists, doctors, nurses and physiotherapists, as well as nursing managers, ERAS coordinators, care coordinators and service improvement coordinators[21]. Participants in one study were recruited specifically because of their role as local ERAS champions[20]. Individual semi-structured interviews were used for data collection in all eight studies. Two studies conducted focus groups as well as interviews[24], and one also collected and analysed memos and reflective journals completed by participants[23].

1  
2  
3  
4  
5 Analysis yielded five themes which are shown in Table 1: communication and collaboration,  
6  
7 resistance to change, role and significance of protocol-based care, knowledge and expectations, and  
8  
9 temporality. This enabled us to identify the key elements of health professionals' experiences of  
10  
11 and perspectives on participation in an ERAS pathway. The themes are described in turn.  
12  
13  
14

### 15 **Theme 1: Communication and collaboration**

16  
17 Findings from all of the studies emphasised that the successful integration of ERAS practices  
18  
19 depends upon effective multidisciplinary team (MDT) communication, and a shared willingness to  
20  
21 collaborate. Where this worked well, comprehensive education for staff and patients about ERAS, as  
22  
23 well as clear and effective dissemination of knowledge and information were felt to be contributing  
24  
25 factors. The high turnover of MDT staff was cited as presenting a challenge to this process, and it  
26  
27 was suggested that providing a 'thorough introduction'[24] about ERAS principles to new staff  
28  
29 helped to improve matters. Good team work was also seen to be crucial[22], since this helped to  
30  
31 foster an environment in which discipline or intervention specific concerns[19], and issues relating to  
32  
33 staff and practice[21] could be addressed. Strong team communication was also seen as a means of  
34  
35 mitigating staff confusion about ERAS[21]: specific areas identified as requiring improvement were  
36  
37 communications between nurses and surgeons[19], dialogue between staff and patients, in which  
38  
39 the compressed and information-filled approach of ERAS can prove especially challenging[24].  
40  
41 Having a small clinical community and a close-knit team was recognised as creating a good basis for  
42  
43 effective organisational interactions[22].  
44  
45  
46  
47  
48

49 Staff also drew attention to the challenges of coordinating the various aspects of the ERAS  
50  
51 programme, and maintaining a good collaborative approach to this within the MDT[23]: indeed,  
52  
53 there were concerns that a lack of coordination across different clinical departments served to  
54  
55  
56  
57  
58

1  
2  
3 jeopardise ongoing consistency of practice[22], and it was felt that the provision of feedback and  
4  
5 audits to hospital stakeholders[20] was a valuable communicative resource in this respect.

6  
7 For staff working as champions, building good relationships in and across participating ERAS centres  
8  
9 was essential for the successful integration of the programme. They recognised that such  
10  
11 relationships served to encourage communication about - and, thereby, establish better shared  
12  
13 understandings of current practices on the ground[20], and raise awareness about ERAS  
14  
15 guidelines[22] by making sure that everyone's onboard. It was felt that ERAS programmes were most  
16  
17 effectively introduced using a bottom up, as opposed to a top down approach[20]. Champions  
18  
19 indicated that staff were more likely to engage positively with the integration of ERAS practices  
20  
21 where they are able to be involved in co-creating them from the ground up, since this collaborative  
22  
23 endeavour helped to foster a collective sense of responsibility[20].  
24  
25  
26  
27

## 28 **Theme 2: Resistance to change**

29  
30 Data from the studies included in this review highlighted how *resistance to change* amongst staff  
31  
32 had presented a major challenge to the implementation of ERAS at both collective and individual  
33  
34 levels. It was noted, for instance, that introducing and implementing the programme requires a  
35  
36 culture change[19,20] for staff, which they expect to find big and dramatic[23]. Concerns about the  
37  
38 unfamiliarity of new working practices can lead to negative attitudes and a reluctance to engage  
39  
40 with ERAS guidelines[23], whilst a fundamental dislike of change more widely also provokes  
41  
42 disinclination[19,22]. The scope and intensity of the resistance described here is also motivated by  
43  
44 staff age and experience[21]. Newer nurses, for instance, found it easier to adjust to the programme  
45  
46 and tended to do so more quickly than those who were seen to be stuck in old ways[23].  
47  
48  
49  
50

51 Appointing a "champion" was recognised as having been extremely helpful in terms of encouraging  
52  
53 positive attitudes and effective collaboration when implementing ERAS programmes[19,20,26]. Staff  
54  
55 taking up this, or a similar, role were appointed from a range of MDT disciplines, and included a  
56  
57  
58  
59  
60



1  
2  
3 ward based designated ERAS nurse[23] and an ERAS coordinator[21]. From the perspective of the  
4  
5 champions themselves, meanwhile, resistance was conceptualised less broadly and in more precise  
6  
7 terms: attributing this, for instance, to a lack of agreement about specific interventions rather than  
8  
9 wider processes[20]. They also felt that even where MDTs were, on the whole, easily accepting of  
10  
11 ERAS guidelines, there could still be individual level resistance[20] from some staff.  
12

### 15 **Theme 3: Role and significance of protocol based care**

17 Staff recognised that working to evidence based protocol based guidelines can in principle be  
18  
19 helpful, because it “provides a framework to optimise patient flow by examining what should be  
20  
21 done, when, and by whom, thereby reducing delays for patients”[23: p.30] standardising practices,  
22  
23 reducing variations in treatment, and thereby ostensibly improving the quality of patient care. In  
24  
25 practice, however, there were mixed feelings amongst MDT staff as to whether or not this was the  
26  
27 case in relation to delivering ERAS interventions. Surgeons felt that these were easily implementable  
28  
29 as long as they were based on best evidence and incorporated in standardised order sets[19], whilst  
30  
31 anaesthesiologists acknowledged that although they were not currently following a standardised  
32  
33 protocol, they were open to the idea of implementing standardised guidelines[19]. There was also  
34  
35 agreement amongst MDT staff that the implementation of the ERAS programme would provide  
36  
37 consistency across working practices[22].  
38  
39  
40  
41

42 The studies highlighted several challenges of “fittingness” in relation to ERAS programmes,  
43  
44 emphasising the relevance of institutional, organisational and patient factors. Champions noted that  
45  
46 ERAS pathways are not definitively prescriptive, and that this leads to variability in how they  
47  
48 ultimately becomes integrated into and operationalised within a site’s existing clinical systems[20].  
49  
50 One study found that needing to modify or deviate from ERAS protocols could create confusion for  
51  
52 staff[21]. Difficulties in fitting high numbers of patients into the timescales recommended for length  
53  
54 of hospital stay under ERAS were also cited as a challenge. Nursing staff seemed to experience the  
55  
56  
57

1  
2  
3 greatest impact of these particular challenges on their day to day work, in which they were faced  
4  
5 with the reality that some patients do not and cannot comply with ERAS requirements and do not  
6  
7 “fit” standard care trajectories, because they are too frail and old, or have very high levels of  
8  
9 comorbidity, and are simply too unwell[21,25]. Such issues presented ethical as well as logistical  
10  
11 difficulties for nursing staff. Some described feeling highly conflicted about the tensions they  
12  
13 experienced in striving to achieve the standardised care targets of ERAS protocols whilst also  
14  
15 upholding their ideals of nursing practice[25]. They felt that they were having to make compromises  
16  
17 in their work, and experienced this as a struggle. Particular concerns were raised about the  
18  
19 detrimental impact that this was having upon nurses’ capacity for providing adequately  
20  
21 individualised care for patients[25], and the notion of having one protocol for all[23] was felt to be  
22  
23 unsatisfactory. Nursing staff felt that the absence of clear guidance about when and how to default  
24  
25 or deviate from ERAS protocols led them to be overly cautious in their work, and they indicated that  
26  
27 better defined and more precise inclusion criteria about which patients to drive through recovery  
28  
29 would be helpful[23].  
30  
31

#### 32 33 34 **Theme 4: Knowledge and expectations**

35  
36 Staff recognised that a good knowledge and understanding of ERAS is crucial if it is to be successfully  
37  
38 implemented, although the scope of this requirement transcends the procedural details and  
39  
40 pragmatic instructions provided by ERAS protocols themselves. Rather, it was important for staff to  
41  
42 have a good grasp of its wider aims and objectives[23], and to believe in the value and (potentially)  
43  
44 positive impact of the intervention[20,23]. Three of the studies found that, on the whole, staff did  
45  
46 feel positive about and favourable towards the implementation of ERAS[19,20,22], and one study  
47  
48 showed that although staff were sceptical about it prior to implementation, they felt more positive  
49  
50 having seen how well ERAS worked in practice[24]. In all the studies, however, staff acknowledged  
51  
52 that considerable challenges still exist and that these will need to be overcome. The nature of such  
53  
54 concerns varied for staff, depending upon their own MDT specialty, since this had impact upon the  
55  
56  
57  
58  
59  
60

1  
2  
3 way in which they engaged with ERAS practices in their everyday work. Nurses, in particular,  
4  
5 described feeling cautious and sceptical about implementing ERAS because of a lack of confidence,  
6  
7 indecision, and anxieties about being challenged by other members of the MDT during ward rounds.  
8  
9 They were also worried about any potentially adverse consequences for patients of progressing their  
10  
11 recovery in accordance with ERAS[23]. Tacit knowledge was also understood to be important for  
12  
13 nurses for their role in implementing ERAS: this helped them to take a common sense[23] approach  
14  
15 to the process, especially in terms of knowing when it was appropriate to deviate from ERAS  
16  
17 guidelines[23,25].  
18  
19

20  
21  
22 Setting and effectively managing expectations was a key concern for health professionals in helping  
23  
24 them to build shared understandings around ERAS, and to understand their own individual tasks and  
25  
26 responsibilities. The expectations of both professionals and patients (and negotiations of the two)  
27  
28 were relevant here. Staff felt that they themselves benefitted from setting clear patient  
29  
30 expectations[19], and were also keenly aware of some of the complex difficulties in collective  
31  
32 understandings of what was expected from whom, when, and in which ways across the MDT, where  
33  
34 various parties "made an effort to fulfil the other's expectations in the situation, but from different  
35  
36 perspectives and different understandings of the same situation"[24: p.420].  
37  
38

39  
40 Pearsall et al.[19] note that staff expectations - of self and others - differ across the MDT and,  
41  
42 importantly, explore how these are linked to (sometimes incorrect) assumptions made by some staff  
43  
44 about the knowledge and expectations of their colleagues, creating uncertainty and ambivalence  
45  
46 around ERAS implementation. For instance, where nurses anticipated that some surgeons might  
47  
48 resist ERAS recommendations, surgeons thought that nursing culture and lack of nursing time would  
49  
50 present a problem. Anaesthetists, meanwhile, were concerned that patients would not understand  
51  
52 ERAS guidelines and procedures, and assumed that it would be very difficult to amend existing and  
53  
54 well-established nursing culture and surgeon behaviours. The surgeons themselves were  
55  
56  
57

1  
2  
3 unconvincing as to whether changes made in accordance with ERAS would make any difference to  
4 patients' experiences of the surgical pathway.  
5  
6  
7

8  
9 Staff acknowledged that their expectations about ERAS timeframes should be realistic[23], that is,  
10 accepting of the reality that some patients would be unable to achieve recovery according to the  
11 goals prescribed in the protocol. Whilst some nurses conceptualised such non-achievement as a  
12 failure of the [ERAS] programme[23], however, others saw the patients themselves as being  
13 responsible for this, on account of them being unprepared for a short hospital stay or early  
14 mobilisation, and feeling disproportionately anxious about the process[25]. Staff recognised the  
15 extent to which good pre-operative education is helpful for patients, but noted that they  
16 nevertheless have to deal with problems arising where patients have unrealistic expectations, forget  
17 important information, or simply will not comply with ERAS instructions[21]. It was also felt that  
18 some patients might be unable to understand the information and instructions that they received,  
19 creating difficulties for MDT staff[22].  
20  
21  
22  
23  
24  
25  
26  
27  
28  
29  
30  
31  
32  
33

#### 34 **Theme 5: Temporality**

35  
36 Temporality is highlighted as being important in findings from the studies: the successful embedding  
37 of ERAS is described, for instance, as a process that requires a slow but steady approach, becoming  
38 normalised over time, until it is established as the standard of care [so that] there's nothing to talk  
39 about[20]. The attitudes of staff towards ERAS programmes also changed over time, typically  
40 becoming more favourable as the integration continued[24], and nursing staff were keen to reflect  
41 on this, recognising how long it had taken them, to see ERAS practices as routine and second  
42 nature[23]. Some of the primary challenges identified to the effective ongoing integration of ERAS,  
43 meanwhile, were factors relating to a perceived lack of the resources (within and external to local  
44 sites) required to maintain the programme over time. These included a lack of adequate finances,  
45 limited space, a shortage of equipment, and too few nursing staff[22], as well as poor administrative  
46  
47  
48  
49  
50  
51  
52  
53  
54  
55  
56  
57  
58  
59  
60

1  
2  
3 support for the programme[20]. Insufficient community support for discharge procedures and  
4  
5 arrangements was also cited as a hindrance to successful embedding of ERAS.  
6

## 7 **DISCUSSION**

8  
9  
10  
11 Our meta-synthesis of qualitative studies produced five themes, which reflect key issues, concerns  
12  
13 and areas of importance identified by health professionals in relation to their experiences of  
14  
15 delivering ERAS pathways. These themes were communication and collaboration, resistance to  
16  
17 change, role and significance of protocol-based care, knowledge and expectations, and temporality.  
18  
19 Staff emphasised that there must be effective MDT collaboration and communication, if ERAS  
20  
21 practices are to be successfully implemented and integrated. This included providing a thorough  
22  
23 education to staff and patients about ERAS, and ensuring that information and knowledge about it  
24  
25 was clearly and consistently disseminated across the MDT. The coordination of ERAS approaches  
26  
27 was acknowledged to be challenging, and the appointment of a designated ERAS champion was  
28  
29 experienced as being helpful in this respect.  
30  
31

32  
33  
34 The value of evidence based protocol based guidelines was described as useful means of helping to  
35  
36 improve patient care by bringing about a standardisation of practices and a reduction in variations in  
37  
38 treatment, but staff were ambivalent about the extent to which ERAS created consistencies in  
39  
40 practice. Concerns were raised about the necessity of modifying or deviating from ERAS guidelines,  
41  
42 where these did not “fit” with local site systems or with the care requirements of individual patients.  
43  
44 A need for more precise information about how best to do this was identified.  
45  
46  
47  
48

49 A comprehensive knowledge and understanding of ERAS was cited as being essential to its successful  
50  
51 implementation: in terms of both procedural detail and the broader aims and objectives that  
52  
53 underpin the intervention itself. Staff were concerned about the impact of ERAS upon their own  
54  
55 everyday working practices, and in relation to their own particular MDT speciality. Staff expectations  
56  
57

1  
2  
3 about ERAS varied across MDT disciplines, and the need to set and manage these effectively was  
4  
5 prioritised. The importance of establishing 'realistic' expectations was emphasised for staff and also  
6  
7 the patients for whom they care.  
8  
9

10  
11 The implementation and embedding of ERAS was understood to require complex processes of  
12  
13 adjustment, acceptance and engagement for staff, constituting a process that evolves gradually over  
14  
15 time. Staff attitudes towards ERAS were also subject to temporal change, and tended to become  
16  
17 increasingly favourable via reflections upon how well the new and or amended practices were  
18  
19 working, and the ways in which they became 'normalised'.  
20  
21

22  
23  
24 Given that ERAS seeks to improve patients' outcomes through consistency in care, findings from our  
25  
26 review highlight that, whilst health professionals are confident that ERAS pathways have the  
27  
28 potential to achieve this, some key improvements are needed. The findings of this review build upon  
29  
30 existing knowledge about ERAS by showing that the pathway is implemented disparately across  
31  
32 different settings, according to local contexts and circumstances[4], and that the provision of better  
33  
34 information and education to staff and patients can achieve better consistency. Our review also  
35  
36 finds that health professionals cite resistance to change amongst staff as a hindrance to the effective  
37  
38 implementation of ERAS[6], and that appointing a dedicated Enhanced Recovery "champion" is felt  
39  
40 to mitigate this[7]. Our findings demonstrate that effective collaboration and communication  
41  
42 amongst staff – and between staff and patients – helps to improve the effectiveness of ERAS[5].  
43  
44 This review also observes that staff use different strategies of discursive framing to describe their  
45  
46 experiences of implementing and engaging with ERAS practices, which indicate that temporality is an  
47  
48 important factor in this respect. These include accounts of adapting to, adjusting to, and coming  
49  
50 around to the programme[23], adopting the pathway[19], being accepting of it[20], and compliance  
51  
52 with ERAS guidelines[21]. From a discursive psychological perspective – which focuses upon social  
53  
54  
55  
56  
57  
58  
59  
60

1  
2  
3 construction through language[27], these framings illustrate how the implementation of ERAS is  
4  
5 produced through talk[28] as a gradual process which evolves over time.

6  
7 We conducted the systematic review in a manner that was designed to capture as many studies as  
8  
9 possible by using keywords that were identified and refined from existing literature. To enhance  
10  
11 rigour in study selection the included studies were all appraised by the two authors. This process  
12  
13 acted as a screening process that allowed us to exclude three studies and retain eight as well as  
14  
15 appraise whether the included studies met the CASP criteria sufficiently. Assessment using the CASP  
16  
17 criteria can be conducted in a variety of ways and our process enabled us to define all studies to be  
18  
19 of sufficient quality. To improve reporting quality of this review, we have adhered to the ENTREQ  
20  
21 guidance on the reporting of qualitative syntheses[29]. The reflexive approach of the authors in the  
22  
23 selection process sought to minimise researcher bias.  
24  
25

26  
27  
28 One of the strengths of this review is that it includes a range of different studies, and therefore  
29  
30 incorporates a variety of populations and geographical contexts. Further strengths are the diversity  
31  
32 of methodological approaches used in the studies, and the different clinical contexts and local  
33  
34 environments of the included studies. This provides a richness of perspectives. Additionally, there  
35  
36 are few existing systematic reviews of qualitative studies on staff experiences of ERAS. This paper  
37  
38 therefore makes a valuable contribution to the field of literature. A limitation of this review is the  
39  
40 small number of included studies, which reduce the level of transferability of our findings. Another  
41  
42 limitation is that there are no ethnographic studies included in our review and, as such, it does not  
43  
44 benefit from the use of observational data on the implementation of ERAS. We suggest that future  
45  
46 research could build upon existing knowledge of and understanding about staff perspectives of ERAS  
47  
48 by taking an ethnographic approach. We also note that ERAS pathways are now being implemented  
49  
50 in elective orthopaedic surgery, and suggest that this is a valuable area for future study.  
51  
52  
53  
54  
55  
56  
57  
58  
59  
60

## CONCLUSION

We reviewed and synthesised qualitative studies that explore health professionals' experiences of and perspectives on the enhanced recovery after surgery (ERAS) pathway. Findings indicate that, whilst staff generally feel positive about the implementation of ERAS, they acknowledge that the process is complex and challenging. Many of the challenges identified, such as resistance to change and lack of confidence can however be mitigated by ensuring that MDTs understand ERAS principles and guidelines, and that they communicate well with one another and with patients. Other challenges, such as a lack of local resources and high rates of comorbidity amongst patients are perhaps more challenging to address. We suggest that the provision of comprehensive, coherent and locally relevant information to health professionals would help to improve the implementation and delivery of ERAS pathways. Identifying and recruiting an ERAS champion is also recommended as means of improving the effectiveness of the pathway.

## A: CONTRIBUTORSHIP STATEMENT

The authors of this article are Dr Rachel Cohen (RC) and Professor Rachael Goberman-Hill (RGH). Both authors made substantial contributions to the conception and the design of the systematic review. Literature searches were conducted by RC, and RGH carried out the CASP screening. Both RC and RGH contributed to the extraction, analysis and interpretation of data from the papers included in the review. RC and RGH worked on drafts of the review, made revisions and agreed on a final version for publication. Both RC and RGH agree to be accountable for all aspects of the work in ensuring that questions related to the accuracy or integrity of any part of the work are appropriately investigated and resolved.



1  
2  
3  
4  
5 Support for the study was received from the Oxford NIHR Biomedical Research Centre, Nuffield  
6  
7 Orthopaedic Centre, University of Oxford. The views and opinions expressed therein are those of the  
8  
9 authors and do not necessarily reflect those of the HS&DR Programme, NIHR, NHS or the  
10  
11 Department of Health. We thank the wider team for the study, including Professor Andrew Judge as  
12  
13 Principal Investigator. We also thank Christine Hobson for her work in support of our research.  
14  
15

#### 16 17 18 **B: COMPETING INTERESTS**

19  
20 The author and co-author have no competing interests to declare  
21  
22

#### 23 24 25 **C: FUNDING**

26  
27 This review forms part of the dissemination strategy for the Atlas (Ethnographic study of care  
28  
29 pathways for hip and knee replacement) project, which is funded by the National Institute for Health  
30  
31 Research Health Services and Delivery Research Programme (project number 14/46/02).  
32  
33

#### 34 35 36 **D: DATA SHARING STATEMENT**

37  
38 Data for the study may be made available from University of Bristol's research data  
39  
40 repository under a controlled access arrangement. Requests for access will be referred to  
41  
42 the University's data access committee before data can be shared under a data sharing  
43  
44 agreement. As such, anonymous data from the study may be seen and used by other  
45  
46 researchers, for ethically approved research projects, on the understanding that  
47  
48 confidentiality will be maintained. Release of the data will be at the discretion of the data  
49  
50 access committee (data custodian).  
51  
52  
53  
54  
55  
56  
57  
58  
59  
60

1  
2  
3  
4  
5 **REFERENCES**  
6  
7  
8

- 9 1. Kehlet H. Fast-track colorectal surgery. *The Lancet* 2008;371:791-3.
- 10  
11  
12 2. Department of Health. Enhanced Recovery Partnership Programme Project Report. March  
13 2011. Available from: [https://www.gov.uk/government/publications/enhanced-recovery-](https://www.gov.uk/government/publications/enhanced-recovery-partnership-programme)  
14 [partnership-programme](https://www.gov.uk/government/publications/enhanced-recovery-partnership-programme) (accessed 1 Feb 2017).  
15  
16  
17 3. Campbell NC, Murray E, Darbyshire J, *et al*. Designing and evaluating complex interventions to  
18 improve health care. *BMJ* 2007;334:455-9.  
19  
20  
21  
22 4. Craig P, Dieppe P, Macintyre S, *et al*. Developing and Evaluating Complex Interventions: The New  
23 Medical Research Council Guidance. *BMJ* 2008;337:979-83.  
24  
25  
26  
27  
28  
29 5. Waring J, Marshall F, Bishop S, *et al*. An ethnographic study of knowledge sharing across the  
30 boundaries between care processes, services and organisations: the contributions to 'safe' hospital  
31 discharge. *Health Serv Deliv Res* 2014;2;1-160.  
32  
33  
34  
35  
36  
37  
38 6. Moore G, Audrey S, Barker M, *et al*. Process evaluation in complex public health intervention  
39 studies: the need for guidance. *J Epidemiol Community Health* 2014;68:101-2.  
40  
41  
42  
43  
44  
45 7. Paton F, Chambers D, Wilson P, *et al*. Effectiveness and implementation of enhanced recovery  
46 after surgery programmes: a rapid evidence synthesis. *BMJ Open* 2014;4:e005015.  
47  
48  
49  
50  
51  
52  
53 8. Bernard H, Foss M. The impact of the enhanced recovery after surgery (ERAS) programme on  
54 community nursing. *Br J Community Nurs* 2014;19:184-8.  
55  
56  
57

- 1  
2  
3  
4  
5 9. Blazeby JM, Soulsby M, Winstone K, *et al.* A qualitative evaluation of patients' experiences of an  
6 enhanced recovery programme for colorectal cancer. *Colorectal Dis* 2010;12:e236-42.  
7  
8  
9  
10  
11 10. Hunt GR, Hall GM, Murthy BV, *et al.* Early Discharge Following hip Arthroplasty: Patients'  
12 acceptance masks doubts and concerns. *Health Expect* 2009;12:130-7.  
13  
14  
15  
16  
17 11. Husted H, Holm G. Fast track in total hip and knee arthroplasty - experiences from Hvidovre  
18 University Hospital, Denmark. *Injury* 2006;37(Suppl 5):S31-S35.  
19  
20  
21  
22  
23  
24 12. Norlyk A. The experience of fast track postoperative rehabilitation regimen: the patients'  
25 perspective. *Klinisk Sygepleje* 2008;22:53-63.  
26  
27  
28 13. Norlyk A, Harder I. After colonic surgery: The lived experience of participating in a fast-track  
29 programme. *Int J Qual Stud on Health Well-being* 2009;4:170-180.  
30  
31  
32  
33  
34 14. Sibbern T, Bull Sellevold V, Steindal SA, *et al.* Patients' Experiences of Enhanced Recovery after  
35 Surgery: a systematic review of qualitative studies. *J Clin Nurs* 2017;26:1172-188.  
36  
37  
38  
39  
40  
41 15. Critical Skills Appraisal Programme. *CASP Systematic Review Checklist*. Available from:  
42 <http://www.casp-uk.net/checklists> (accessed 1 Feb 2016).  
43  
44  
45  
46  
47 16. Polit DF, Beck CT. *Nursing Research: Generating and Assessing Evidence for Nursing Practice*.  
48 Philadelphia: Wolters Kluwer/Lippincott Williams and Wilkins; 2008.  
49  
50  
51  
52  
53 17. Graneheim UH, Lundman B. Qualitative content analysis in nursing research: concepts,  
54 procedures and measures to achieve trustworthiness. *Nurse Educ Today* 2004;24:105-12.  
55  
56  
57

1  
2  
3  
4  
5 18. Uhrenfeldt L, Aagaard H, Hall EO, *et al*. A qualitative meta-synthesis of patients' experiences of  
6 intra- and inter-hospital transitions. *J Adv Nurs* 2013;69:1678–90.  
7  
8  
9

10  
11 19. Pearsall EA, Meghiji A, Pitzul KB, *et al*. A Qualitative Study to Understand the Barriers and  
12 Enablers in Implementing an Enhanced Recovery after Surgery Program. *Ann Surg* 2015;261:92-6.  
13  
14  
15

16  
17 20. Gotlib Conn L, McKenzie M, Pearsall EA, *et al*. Successful implementation of an enhanced  
18 recovery after surgery programme for elective colorectal surgery: a process evaluation of  
19 champions' experiences. *Implement Sci* 2015;10:99.  
20  
21  
22  
23

24  
25  
26 21. Lyon A, Solomon MJ, Harrison JD. A Qualitative Study Assessing the Barriers to Implementation  
27 of Enhanced Recovery after Surgery. *World J Surg* 2014;38:1374-80.  
28  
29

30 22. Alawadi ZM, Leal I, Phatak UR, *et al*. Facilitators and barriers of implementing enhanced  
31 recovery in colorectal surgery at a safety net hospital: A provider and patient perspective. *Surgery*  
32 2016;159:700-12.  
33  
34  
35

36  
37  
38 23. Jeff A, Taylor C. Ward nurses' experiences of enhanced recovery after surgery: a grounded  
39 theory approach. *Gastrointestinal Nursing* 2014;12:23-31.  
40  
41  
42

43  
44  
45 24. Wagner L, Carlslund AM, Moller C, *et al*. Patient and staff (doctors and nurses) experiences of  
46 abdominal hysterectomy in accelerated recovery programme: A qualitative study. *Dan Med Bull*  
47 2004;51:418-21.  
48  
49  
50

1  
2  
3 25. Berthelsen CB, Frederiksen K. Orchestrating care through the fast track perspective: A  
4 qualitative content analysis of the provision of individualised nursing care in orthopaedic fast-track  
5 programmes. *Int J Orthop Trauma Nurs* 2017;24:40-9.  
6  
7  
8  
9

10  
11 26. Sjetne IS, Krogstad U, Odegard, S, *et al.* Improving quality by introducing enhanced recovery  
12 after surgery in a gynaecological department: consequences for ward nursing practice. *Qual Saf*  
13 *Health Care*; 2009;18;236-40.  
14  
15  
16  
17

18  
19 27. Wiggins S, Potter J. Discursive Psychology. In: Willig C, Hollway SR, eds. *Handbook of Qualitative*  
20 *Research*. London:Sage 2008:72-89.  
21  
22  
23

24  
25 28. Potter J, Wetherell M. *Discourse and Social Psychology: Beyond Attitudes and Behaviour*.  
26 London: Sage, 1987.  
27  
28  
29

30  
31 29. Tong A, Flemming K, McInnes *et al.* Enhancing transparency in reporting the synthesis of  
32 qualitative research: ENTREQ. *BMC Med Res Methodol* 2012;12:181.  
33  
34  
35  
36  
37  
38  
39  
40  
41  
42  
43  
44  
45  
46  
47  
48  
49  
50  
51  
52  
53  
54  
55  
56  
57  
58  
59  
60

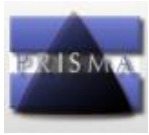

# PRISMA 2009 Flow Diagram

## Staff experiences of Enhanced Recovery after Surgery – Systematic Review of Qualitative Studies

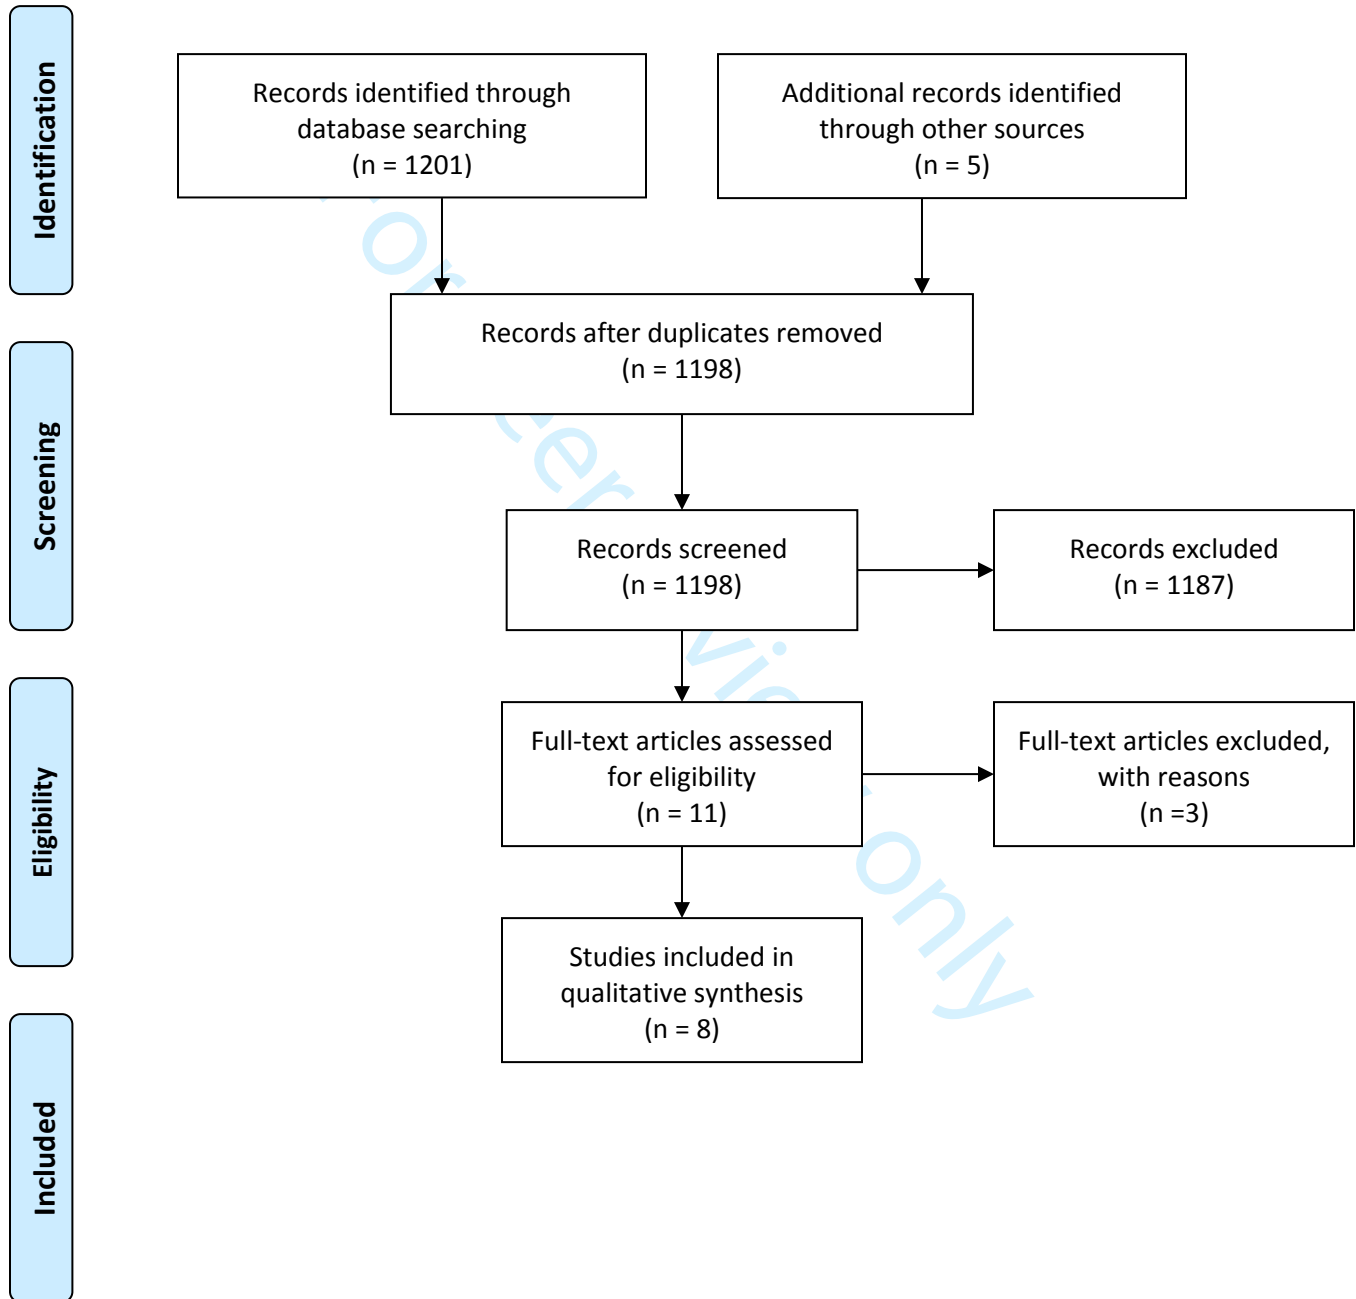

From: Moher D, Liberati A, Tetzlaff J, Altman DG, The PRISMA Group (2009). Preferred Reporting Items for Systematic Reviews and Meta-Analyses: The PRISMA Statement. PLoS Med 6(7): e1000097. doi:10.1371/journal.pmed1000097

For more information, visit [www.prisma-statement.org](http://www.prisma-statement.org).

For peer review only - <http://bmjopen.bmj.com/site/about/guidelines.xhtml>

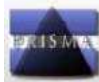

# PRISMA 2009 Checklist

| Section/topic                      | #  | Checklist item                                                                                                                                                                                                                                                                                              | Reported on page # |
|------------------------------------|----|-------------------------------------------------------------------------------------------------------------------------------------------------------------------------------------------------------------------------------------------------------------------------------------------------------------|--------------------|
| <b>TITLE</b>                       |    |                                                                                                                                                                                                                                                                                                             |                    |
| Title                              | 1  | Identify the report as a systematic review, meta-analysis, or both.                                                                                                                                                                                                                                         | 1                  |
| <b>ABSTRACT</b>                    |    |                                                                                                                                                                                                                                                                                                             |                    |
| Structured summary                 | 2  | Provide a structured summary including, as applicable: background; objectives; data sources; study eligibility criteria, participants, and interventions; study appraisal and synthesis methods; results; limitations; conclusions and implications of key findings; systematic review registration number. | 2                  |
| <b>INTRODUCTION</b>                |    |                                                                                                                                                                                                                                                                                                             |                    |
| Rationale                          | 3  | Describe the rationale for the review in the context of what is already known.                                                                                                                                                                                                                              | 4                  |
| Objectives                         | 4  | Provide an explicit statement of questions being addressed with reference to participants, interventions, comparisons, outcomes, and study design (PICOS).                                                                                                                                                  | 5                  |
| <b>METHODS</b>                     |    |                                                                                                                                                                                                                                                                                                             |                    |
| Protocol and registration          | 5  | Indicate if a review protocol exists, if and where it can be accessed (e.g., Web address), and, if available, provide registration information including registration number.                                                                                                                               | 5                  |
| Eligibility criteria               | 6  | Specify study characteristics (e.g., PICOS, length of follow-up) and report characteristics (e.g., years considered, language, publication status) used as criteria for eligibility, giving rationale.                                                                                                      | 6                  |
| Information sources                | 7  | Describe all information sources (e.g., databases with dates of coverage, contact with study authors to identify additional studies) in the search and date last searched.                                                                                                                                  | 5,6                |
| Search                             | 8  | Present full electronic search strategy for at least one database, including any limits used, such that it could be repeated.                                                                                                                                                                               | 5,6                |
| Study selection                    | 9  | State the process for selecting studies (i.e., screening, eligibility, included in systematic review, and, if applicable, included in the meta-analysis).                                                                                                                                                   | 5,6,7              |
| Data collection process            | 10 | Describe method of data extraction from reports (e.g., piloted forms, independently, in duplicate) and any processes for obtaining and confirming data from investigators.                                                                                                                                  | 6-9                |
| Data items                         | 11 | List and define all variables for which data were sought (e.g., PICOS, funding sources) and any assumptions and simplifications made.                                                                                                                                                                       | 6-9                |
| Risk of bias in individual studies | 12 | Describe methods used for assessing risk of bias of individual studies (including specification of whether this was done at the study or outcome level), and how this information is to be used in any data synthesis.                                                                                      | 6-9                |
| Summary measures                   | 13 | State the principal summary measures (e.g., risk ratio, difference in means).                                                                                                                                                                                                                               | N/A                |
| Synthesis of results               | 14 | Describe the methods of handling data and combining results of studies, if done, including measures of consistency (e.g., $I^2$ ) for each meta-analysis.                                                                                                                                                   | 6-9                |

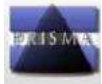

# PRISMA 2009 Checklist

Page 1 of 2

| Section/topic                 | #  | Checklist item                                                                                                                                                                                           | Reported on page # |
|-------------------------------|----|----------------------------------------------------------------------------------------------------------------------------------------------------------------------------------------------------------|--------------------|
| Risk of bias across studies   | 15 | Specify any assessment of risk of bias that may affect the cumulative evidence (e.g., publication bias, selective reporting within studies).                                                             | N/A                |
| Additional analyses           | 16 | Describe methods of additional analyses (e.g., sensitivity or subgroup analyses, meta-regression), if done, indicating which were pre-specified.                                                         | N/A                |
| <b>RESULTS</b>                |    |                                                                                                                                                                                                          |                    |
| Study selection               | 17 | Give numbers of studies screened, assessed for eligibility, and included in the review, with reasons for exclusions at each stage, ideally with a flow diagram.                                          | 6,7                |
| Study characteristics         | 18 | For each study, present characteristics for which data were extracted (e.g., study size, PICOS, follow-up period) and provide the citations.                                                             | 10-12              |
| Risk of bias within studies   | 19 | Present data on risk of bias of each study and, if available, any outcome level assessment (see item 12).                                                                                                | N/A                |
| Results of individual studies | 20 | For all outcomes considered (benefits or harms), present, for each study: (a) simple summary data for each intervention group (b) effect estimates and confidence intervals, ideally with a forest plot. | N/A                |
| Synthesis of results          | 21 | Present results of each meta-analysis done, including confidence intervals and measures of consistency.                                                                                                  | N/A                |
| Risk of bias across studies   | 22 | Present results of any assessment of risk of bias across studies (see Item 15).                                                                                                                          | N/A                |
| Additional analysis           | 23 | Give results of additional analyses, if done (e.g., sensitivity or subgroup analyses, meta-regression [see Item 16]).                                                                                    | N/A                |
| <b>DISCUSSION</b>             |    |                                                                                                                                                                                                          |                    |
| Summary of evidence           | 24 | Summarize the main findings including the strength of evidence for each main outcome; consider their relevance to key groups (e.g., healthcare providers, users, and policy makers).                     | 19-21              |
| Limitations                   | 25 | Discuss limitations at study and outcome level (e.g., risk of bias), and at review-level (e.g., incomplete retrieval of identified research, reporting bias).                                            | 21,22              |
| Conclusions                   | 26 | Provide a general interpretation of the results in the context of other evidence, and implications for future research.                                                                                  | 21,22              |
| <b>FUNDING</b>                |    |                                                                                                                                                                                                          |                    |
| Funding                       | 27 | Describe sources of funding for the systematic review and other support (e.g., supply of data); role of funders for the systematic review.                                                               | 23                 |

From: Moher D, Liberati A, Tetzlaff J, Altman DG, The PRISMA Group (2009). Preferred Reporting Items for Systematic Reviews and Meta-Analyses: The PRISMA Statement. PLoS Med 6(7): e1000097. doi:10.1371/journal.pmed1000097

For more information, visit: [www.prisma-statement.org](http://www.prisma-statement.org).

Page 2 of 2

For peer review only - <http://bmjopen.bmj.com/site/about/guidelines.xhtml>



# BMJ Open

## Staff Experiences of Enhanced Recovery after Surgery – Systematic Review of Qualitative Studies

|                                 |                                                                                                                                                          |
|---------------------------------|----------------------------------------------------------------------------------------------------------------------------------------------------------|
| Journal:                        | <i>BMJ Open</i>                                                                                                                                          |
| Manuscript ID                   | bmjopen-2018-022259.R1                                                                                                                                   |
| Article Type:                   | Research                                                                                                                                                 |
| Date Submitted by the Author:   | 18-Jun-2018                                                                                                                                              |
| Complete List of Authors:       | Cohen, Rachel; University of Bristol, School of Population Health Sciences<br>Goberman-Hill, Rachael; University of Bristol, School of Clinical Sciences |
| <b>Primary Subject Heading</b>: | Health services research                                                                                                                                 |
| Secondary Subject Heading:      | Qualitative research                                                                                                                                     |
| Keywords:                       | Enhanced recovery, Qualitative, Joint replacement                                                                                                        |
|                                 |                                                                                                                                                          |

SCHOLARONE™  
Manuscripts

Peer Review Only

1  
2  
3 **Article Title: STAFF EXPERIENCES OF ENHANCED RECOVERY AFTER SURGERY – SYSTEMATIC**  
4 **REVIEW OF QUALITATIVE STUDIES**  
5

6  
7 **Authors:** #Dr Rachel Cohen and Professor Rachael Goberman-Hill\*  
8  
9

10  
11  
12 **\*Corresponding author:** Dr Rachel Cohen, Centre for Academic Mental Health, Department  
13  
14 of Population Health Sciences, Bristol Medical School, University of Bristol, Bristol, BS8 2BN, UK  
15

16  
17 **Corresponding author's Email address:** rachel.cohen@bristol.ac.uk Tel: +44(0)117 331 4007  
18

19 **#Co-author:** Professor Rachael Goberman-Hill, Professor of Health and Anthropology,  
20  
21 Translational Health Sciences, Bristol Medical School, University of Bristol, Learning and Research  
22  
23 Building, Level 1, Southmead Hospital, Bristol BS10 5NB, UK  
24  
25

26  
27  
28  
29 **Word count:** 4194  
30  
31

32  
33  
34  
35 **Keywords:** Enhanced Recovery, qualitative, joint replacement  
36  
37  
38  
39  
40  
41  
42  
43  
44  
45  
46  
47  
48  
49  
50  
51  
52  
53  
54  
55  
56  
57  
58  
59  
60

**ABSTRACT**

**Objective:** To conduct a systematic review of qualitative studies which explore health professionals' experiences of and perspectives on the enhanced recovery after surgery (ERAS) pathway.

**Design:** Systematic review of qualitative literature using a qualitative content analysis.

**Setting:** Secondary care, including a wide range of hospital settings.

**Participants:** Health professionals including a wide range of Multidisciplinary Team and Allied Health Professional staff to incorporate a diverse range of clinical and professional perspectives.

**Results:** Eight studies were included in the review, including studies in six countries and in four surgical specialties. Included studies focus on health professionals' experiences of ERAS before, during and after implementation in colorectal surgery, gastrointestinal surgery, abdominal hysterectomy, and orthopaedics. Five main themes emerged in the analysis: communication and collaboration, resistance to change, role and significance of protocol-based care, knowledge and expectations, and temporality. Professionals described the importance of effective multidisciplinary team collaboration and communication, providing thorough education to staff and patients, and appointing a dedicated champion as means to implement and integrate ERAS pathways successfully. Evidence based guidelines were thought to be useful for improvements to patient care by standardising practices and reducing treatment variations, but were thought to be too open to interpretation at local levels. Setting and managing 'realistic' expectations of staff was seen as a priority. Staff attitudes towards ERAS tend to become more favourable over time, as practices become successfully 'normalised'.

**Conclusions:** Staff feel positive about the implementation of ERAS, but find the process is complex and challenging. Challenges can be addressed by ensuring that multidisciplinary teams understand ERAS principles and guidelines, and communicate well with one another and with patients. Provision of comprehensive, coherent and locally relevant information to health professionals is helpful. Identifying and recruiting local ERAS champions is likely to improve the implementation and delivery of ERAS pathways.

**ARTICLE SUMMARY****Strengths and limitations of this study**

- There is a need to synthesise qualitative evidence about staff experiences of Enhanced Recovery After Surgery (ERAS) because these provide insight into implementation of ERAS
- The review includes studies with a diverse range of populations, contexts and methodological approaches
- The review includes a small number of studies, but includes studies from six countries in four surgical specialties and so the findings are likely to be transferable and of relevance to several contexts of ERAS implementation

## INTRODUCTION

Enhanced recovery after surgery (ERAS) programmes were introduced and began to be implemented in the late 1990s[1], as part of an initiative towards reducing variations in patient care and improving quality standards[2]. Building upon their Danish origins, ERAS programmes have been internationally adopted, and widely implemented for major elective surgical pathways in colorectal surgery, orthopaedics, gynaecology, cardiology and urology. Depending upon the kind of diagnostic and surgical care in question, ERAS programmes are sometimes referred to using different names, including 'fast-track surgery', 'rapid recovery', 'accelerated discharge' or 'early discharge'.

The aim of ERAS pathways is to reduce length of hospital stay and lessen readmissions, minimise surgical complications, decrease morbidity, and improve cost effectiveness. Best described as a complex intervention[3,4], ERAS seeks to improve patient experiences and outcomes by focusing on key aspects of the care pathway, pre-, peri- and post operatively, as a means of reducing physiological and psychological stress. This involves the provision of better education and information for patients prior to their operations, the use of minimally invasive surgical techniques and anaesthesia, optimal pain management and early post-operative mobilisation, as well as the preparation of a discharge plan[5].

Despite their protocol-based foundations, evidence from recent studies indicates that ERAS pathways are implemented variably across different hospital settings. More information is needed about what the core active ingredients of ERAS are. We also need to know more about how these ingredients exert their effect according to local circumstances, and about how they shape (and are shaped by) the context of their implementation[4,6]. Existing literature has drawn particular attention to the factors which help, and those which hinder, the successful implementation of ERAS, identifying important barriers and facilitators to the process. Barriers include resistance to change, inadequate funding, lack of support from management, high staff turnover, poor documentation,

1  
2  
3 and shortness of time, whilst facilitators included a dedicated enhanced recovery lead, effective  
4 multidisciplinary team working and ongoing education for staff and patients[7].  
5  
6  
7

8  
9 Patient experiences of and satisfaction with ERAS pathways have been studied using both  
10 quantitative and qualitative approaches: the latter have been especially useful in improving  
11 understandings of patient experiences and perspectives e.g.[8,9,10,11,12,13]. Sibbern et al's[14]  
12 systematic review of studies of patients' experiences provides a comprehensive discussion of  
13 existing qualitative research on this specific topic. Health professionals' satisfaction with and  
14 perspectives on ERAS, meanwhile, have typically been explored using quantitative approaches.  
15  
16 Information about the experiences of health professionals in delivery of ERAS is needed to inform  
17 implementation and healthcare policy and practice. Such experiences are best gathered in details  
18 through qualitative research.  
19  
20  
21  
22  
23  
24  
25  
26  
27  
28  
29

30 This article describes a systematic review of qualitative studies of health professionals' experiences  
31 of ERAS pathways. The aim of the review was to synthesise evidence of the experience of health  
32 professionals who have been involved in implementing the ERAS programme, incorporating their  
33 experiences before, during and after the programme was implemented, and of its subsequent  
34 delivery. The review aims to identify overarching themes that provide opportunities for improving  
35 implementation and practice.  
36  
37  
38  
39  
40  
41  
42  
43  
44

## 45 **METHODS**

### 46 **Patient and Public Involvement**

47 This paper is a systematic review of qualitative studies. No patients were involved in the review.  
48

49 Our systematic review was registered on PROSPERO in 2017: the registration number is  
50 CRD42017059952. The review sought to describe the experiences and perspectives of healthcare  
51 professionals involved in delivering enhanced recovery pathways.  
52  
53  
54  
55  
56  
57

1  
2  
3  
4  
5 We used methods of systematic search and review and conducted a search of PsychINFO, Medline,  
6  
7 Cinahl, and PubMed to identify relevant qualitative studies across a range of health care contexts.  
8  
9 The searches were conducted by the first author and checked by the second author. The searches  
10  
11 included studies published from 2000-2017, as an appropriate timeframe to capture evidence about  
12  
13 ERAS after implementation in the late 1990s. Only studies published in the English language were  
14  
15 included, and we included studies that explicitly stated that they used qualitative approaches. For all  
16  
17 of the databases, the search terms used were:  
18  
19  
20

21 ERAS OR enhanced recovery OR fast-track OR accelerated recovery OR rapid recovery  
22  
23 OR early discharge OR patients discharge OR enhance\* recov\* after surg\*  
24  
25 Staff perspective OR staff experience\* OR staff perception\* OR ward staff OR nurs\* OR  
26  
27 professional\*  
28  
29 Qualitative OR interview\* OR ethnograph\* OR observation  
30  
31  
32  
33

34 The reference lists of articles identified from the database search were also scrutinised for possible  
35  
36 additional studies.  
37  
38  
39

40  
41 As shown in the PRISMA flowchart (supplementary file), the database searches yielded 1201 articles  
42  
43 in total. In addition, through searching the reference lists of the included studies, we identified five  
44  
45 further records. Eleven studies met the inclusion criteria, and were assessed for eligibility using the  
46  
47 Critical Appraisal Skills Programme (CASP) guidance (Critical Skills Appraisal Programme 2017)[15].  
48  
49 The CASP checklist for qualitative research provides a means of identifying the strengths and  
50  
51 weaknesses of research articles, assessing their usefulness and validity, and their relevance for  
52  
53 inclusion in the review. The CASP qualitative checklist was designed as a pedagogic tool and  
54  
55 therefore as a means of assessing whether qualitative approaches are appropriate to a research  
56  
57  
58  
59  
60

1  
2  
3 question, the value of results, and to provide the opportunity to assess quality in a qualitative,  
4  
5 expertise-based and discursive fashion. Therefore, we considered the eleven studies using the ten  
6  
7 CASP questions which are: aim, methodology, design, recruitment strategy, data collection,  
8  
9 relationship between researcher and participants, ethical issues, data analysis, findings and research  
10  
11 value - three studies were excluded, and the remaining eight were included. Two of the three that  
12  
13 were excluded at this stage were quantitative rather than qualitative, and one focused on  
14  
15 rehabilitation following hip and knee arthroplasty, but not specifically on ERAS. The two authors  
16  
17 independently conducted quality assessment and agreed that all eight articles addressed all ten  
18  
19 CASP criteria and were of sufficient rigour and relevance for inclusion in the review.  
20  
21  
22  
23

24 After completion of quality assessment we conducted a qualitative meta-synthesis of the eight  
25  
26 eligible articles. This comprised close reading and extraction of key findings using descriptive  
27  
28 qualitative design[16], and a qualitative content analysis[17,18]. For the analysis, we focused on the  
29  
30 manifest content of the articles, i.e. what the texts say[17]. This involved searching for the common  
31  
32 concepts and themes[18] addressed in the articles regarding health professionals' experiences of  
33  
34 and perspectives on ERAS. Supporting quotes were also gathered. This enabled us to develop  
35  
36 meaning units within the themes, with the meaning units extracted from the findings of the studies.  
37  
38 Meaning units refer to the main considerations in relation to each theme that were raised by staff  
39  
40 about their experiences of implementing and delivering ERAS programmes. These were then  
41  
42 condensed into content related categories, which the authors discussed and agreed upon. Content  
43  
44 related categories refer to the suggested techniques for addressing and responding to these  
45  
46 considerations. We then synthesised the chosen categories into themes as shown in Table 1.  
47  
48  
49  
50  
51  
52  
53  
54  
55  
56  
57  
58  
59  
60



**TABLE 1**

| <b>Theme</b>                                 | <b>Meaning Unit</b>                                                                                                                                                                                                                                                                                                                                                                                                                                                                                                                         | <b>Content related category</b>                                                                                                                                                                                                                                                                                                                                                                                                                                                                                                                                        |
|----------------------------------------------|---------------------------------------------------------------------------------------------------------------------------------------------------------------------------------------------------------------------------------------------------------------------------------------------------------------------------------------------------------------------------------------------------------------------------------------------------------------------------------------------------------------------------------------------|------------------------------------------------------------------------------------------------------------------------------------------------------------------------------------------------------------------------------------------------------------------------------------------------------------------------------------------------------------------------------------------------------------------------------------------------------------------------------------------------------------------------------------------------------------------------|
| Collaboration and communication              | <ul style="list-style-type: none"> <li>Staff find the information-rich nature of ERAS confusing. Many staff feel that they do not understand it well enough and/or that they have not received sufficiently clear or consistent information or training</li> <li>Information about ERAS is not always disseminated between staff – and between staff and patients – in a coherent and consistent way.</li> <li>Collaborative MDT work is hindered by high staff turnover and a lack of coordination across different departments</li> </ul> | <ul style="list-style-type: none"> <li>Providing staff and their patients with a comprehensive education about and introduction to ERAS improves understanding and helps to mitigate confusion</li> <li>Strong team communications help to ensure the effective dissemination of information</li> <li>Building good relationships within the MDT helps to encourage dialogue between staff, and to improve their willingness and ability to collaborate. The appointment of a dedicated ERAS ‘champion’ improves staff engagement and collaborative working</li> </ul> |
| Resistance to change                         | <ul style="list-style-type: none"> <li>Staff are reluctant to implement or engage with new and unfamiliar working practices. Some staff – especially those who are older, or more well established in their role – tend to dislike change more generally and are disinclined to engage with ERAS.</li> </ul>                                                                                                                                                                                                                                | <ul style="list-style-type: none"> <li>Appointing an ERAS champion helps to encourage more positive attitudes amongst staff</li> </ul>                                                                                                                                                                                                                                                                                                                                                                                                                                 |
| Role and significance of protocol based care | <ul style="list-style-type: none"> <li>Staff recognise the usefulness of evidence-based protocol guidelines as a means of reducing variations and standardising practice, but have mixed feelings about whether ERAS facilitates this well.</li> <li>ERAS is not definitively prescriptive, and therefore allows for too much variability in local implementation.</li> <li>Some staff feel conflicted about having to compromise their capacity for and confidence in providing</li> </ul>                                                 | <ul style="list-style-type: none"> <li>The incorporation of standardised order sets and basing ERAS practices on best evidence increases staff willingness to implement it as a complex intervention</li> <li>Having a local ERAS champion helps to improve consistency in implementing and operationalising the pathway into existing systems at local sites</li> <li>Clearer guidance about when</li> </ul>                                                                                                                                                          |

|                                   |                                                                                                                                                                                                                                                                                                                                                                                                                                                                                                                                                                                                                         |                                                                                                                                                                                                                                                                                                                                                                                                                                                    |
|-----------------------------------|-------------------------------------------------------------------------------------------------------------------------------------------------------------------------------------------------------------------------------------------------------------------------------------------------------------------------------------------------------------------------------------------------------------------------------------------------------------------------------------------------------------------------------------------------------------------------------------------------------------------------|----------------------------------------------------------------------------------------------------------------------------------------------------------------------------------------------------------------------------------------------------------------------------------------------------------------------------------------------------------------------------------------------------------------------------------------------------|
|                                   | individualised care for patients.                                                                                                                                                                                                                                                                                                                                                                                                                                                                                                                                                                                       | it is acceptable to deviate from ERAS protocols would improve staff confidence.                                                                                                                                                                                                                                                                                                                                                                    |
| <b>Knowledge and expectations</b> | <ul style="list-style-type: none"> <li>Staff feel that they need a broader knowledge and understanding of ERAS, i.e. beyond protocol guidelines.</li> <li>Staff are sceptical about the usefulness and value of ERAS prior to its implementation.</li> <li>Managing the expectations of staff and patients is recognised as being crucial to the successful implementation of ERAS. Differing professional perspectives, which are sometimes based on incorrect assumptions, can create ambivalence and uncertainty amongst staff. Staff use tacit knowledge and a “common sense” approach to overcome this.</li> </ul> | <ul style="list-style-type: none"> <li>Belief in the value and potential positive impact of ERAS improves the willingness of staff to engage with the pathway and its guidelines.</li> <li>Staff feel more positive about and favourable towards ERAS when they have seen it work successfully in practice.</li> <li>Setting clear and realistic expectations about ERAS helps to improve staff and patient experiences of the pathway.</li> </ul> |
| <b>Temporality</b>                | <ul style="list-style-type: none"> <li>The successful implementation and embedding of ERAS is a gradual process.</li> </ul>                                                                                                                                                                                                                                                                                                                                                                                                                                                                                             | <ul style="list-style-type: none"> <li>ERAS becomes “normalised” over time, and staff attitudes towards the pathway tend to become more positive. There are ongoing challenges with a lack of available resources (financial and administrative) that are necessary to successfully maintain ERAS over time.</li> </ul>                                                                                                                            |

1  
2  
3  
4  
5  
6  
7  
8  
9  
10  
11  
12  
13  
14  
15  
16  
17  
18  
19  
20  
21  
22  
23  
24  
25  
26  
27  
28  
29  
30  
31  
32  
33  
34  
35  
36  
37  
38  
39  
40  
41  
42  
43  
44  
45  
46  
47  
48  
49  
50  
51  
52  
53  
54  
55  
56  
57  
58  
59  
60

For peer review only

1  
2  
3  
4  
5  
6  
7  
8  
9  
10  
11  
12  
13  
14  
15  
16  
17  
18  
19  
20  
21  
22  
23  
24  
25  
26  
27  
28  
29  
30  
31  
32  
33  
34  
35  
36  
37  
38  
39  
40  
41  
42  
43  
44  
45  
46  
47

**FINDINGS**

The eight studies included were conducted in the UK (n = 1), US (n = 1), Canada (n = 2), Denmark (n = 2), Norway (n=1) and Australia (n = 1) (Table 2).

**TABLE 2**

| Study         | Study design                                                                              | Surgical population | Methodology and methods                                              | Number and type of participants                             | Country | Key findings                                                                                                                                                                                                                 |
|---------------|-------------------------------------------------------------------------------------------|---------------------|----------------------------------------------------------------------|-------------------------------------------------------------|---------|------------------------------------------------------------------------------------------------------------------------------------------------------------------------------------------------------------------------------|
| Alawadi et al | Qualitative study to assess the perceived barriers and facilitators before ERAS adoption. | Colorectal surgery  | Qualitative interviews with MDT staff and patients. Content analysis | 8 anaesthesiologists, 5 surgeons, 6 nurses, and 18 patients | US      | Conclusion: 'Although limited hospital resources are perceived as a barrier to ERAS implementation... there is strong support for such pathways and multiple factors were identified that may facilitate change' (2016: 700) |
| Sjetne et al  | Pre-postintervention                                                                      | Gynaecological      | Questionnaires and                                                   | 34, 33 and 32 nurses                                        | Norway  | Conclusion:                                                                                                                                                                                                                  |

|                |                                                                                                                                                   |                        |                                                                                                                                                        |                                                                                                                                 |         |                                                                                                                                                                               |
|----------------|---------------------------------------------------------------------------------------------------------------------------------------------------|------------------------|--------------------------------------------------------------------------------------------------------------------------------------------------------|---------------------------------------------------------------------------------------------------------------------------------|---------|-------------------------------------------------------------------------------------------------------------------------------------------------------------------------------|
|                | prospective design, to monitor changes in workload and work environment of ward nursing staff when ERAS was introduced                            | surgery                | qualitative interviews. Quantitative data analysed using SAS (t tests and differences in means), qualitative data used to elaborate the topics studied | returned questionnaires in phases 1,2, and 3 respectively (100% survey response rate)<br>9 interviews with 4 different nurses   |         | 'expected clinical gains achieved by introducing ERAS are achieved without compromising the work environment of ward nurses' (2009: 239)                                      |
| Pearsall et al | Qualitative study to understand barriers and enablers in perioperative implementation of ERAS                                                     | Colorectal surgery     | Qualitative semi structured interviews. Thematic analysis                                                                                              | 19 general surgeons, 18 anaesthesiologists, 18 nurses                                                                           | Canada  | Conclusion: 'participants supported the need for implementation of an ERAS program... [but] felt there remained major barriers to [its] successful implementation' (2015: 96) |
| Wagner et al   | Exploratory and descriptive qualitative study to gather knowledge about staff and patient experiences of the Accelerated Recovery Programme (ARP) | Abdominal hysterectomy | Qualitative individual interviews and focus groups with staff, observation of and interviews with patients. Thematic analysis.                         | Observation of 17 patients, 10 of whom were interviewed twice<br>Interviews with 15 staff, who all participated in focus groups | Denmark | Conclusion: patients underwent ARP without significant problems, but identified a need for greater psychological support. Staff data showed a positive                        |

1  
2  
3  
4  
5  
6  
7  
8  
9  
10  
11  
12  
13  
14  
15  
16  
17  
18  
19  
20  
21  
22  
23  
24  
25  
26  
27  
28  
29  
30  
31  
32  
33  
34  
35  
36  
37  
38  
39  
40  
41  
42  
43  
44  
45  
46  
47

|                   |                                                                                                          |                          |                                                                                                         |                                                                           |        |                                                                                                                                                                                                                |
|-------------------|----------------------------------------------------------------------------------------------------------|--------------------------|---------------------------------------------------------------------------------------------------------|---------------------------------------------------------------------------|--------|----------------------------------------------------------------------------------------------------------------------------------------------------------------------------------------------------------------|
|                   |                                                                                                          |                          |                                                                                                         |                                                                           |        | change in opinion and an understanding of ARP. Recommendations made for better information to be provided to staff and patients, in consultation rooms and outpatient clinics                                  |
| Jeff et al        | To explore and describe ward nurses' experience of ERAS in the postoperative phase                       | Gastrointestinal surgery | Semi structured interviews and documentary evidence (memos and reflective journals). Thematic analysis. | Interviews with 8 (of a possible 30) nurses                               | UK     | Conclusion: 'the central difficulty experienced by nurses was trying to adapt the protocol to the demands of patient care delivery within the constraints of their role and organisational culture' (2014: 31) |
| Gotlib Conn et al | Process evaluation of ERAS champions' experiences. To understand enablers and barriers to the successful | Colorectal surgery       | Qualitative semi structured interviews. Normalisation Process Theory framework analysis.                | 5 surgeons, 14 anaesthesiologists, 15 nurses, and 14 project coordinators | Canada | Conclusion: successful implementation of ERAS is achieved by a 'complex series of cognitive and social                                                                                                         |

|            |                                                                                                |                    |                                                                   |                              |           |                                                                                                                                                                                                                                                                                               |
|------------|------------------------------------------------------------------------------------------------|--------------------|-------------------------------------------------------------------|------------------------------|-----------|-----------------------------------------------------------------------------------------------------------------------------------------------------------------------------------------------------------------------------------------------------------------------------------------------|
|            | implementation of ERAS                                                                         |                    |                                                                   |                              |           | processes... [the study demonstrates the importance of] champion coherence, external and internal relationship building, and the strategic management of a project's organisation-level visibility' (2015: 1)                                                                                 |
| Lyon et al | Qualitative study to assess barriers to ERAS implementation, conducted at post-operative stage | Colorectal surgery | Qualitative semi-structured interviews. Grounded theory analysis. | 18 interviews with MDT staff | Australia | Conclusion: there are four key areas that present barriers to successful ERAS implementation: (i) patient-related factors, (ii) staff-related factors, (iii) practice-related issues and (iv) resources. For ERAS to be implemented successfully and function efficiently with high levels of |

1  
2  
3  
4  
5  
6  
7  
8  
9  
10  
11  
12  
13  
14  
15  
16  
17  
18  
19  
20  
21  
22  
23  
24  
25  
26  
27  
28  
29  
30  
31  
32  
33  
34  
35  
36  
37  
38  
39  
40  
41  
42  
43  
44  
45  
46  
47

For peer review only

|                  |                                                                                                                                                                               |                                                |                                                                  |                                       |         |                                                                                                                                                                                      |
|------------------|-------------------------------------------------------------------------------------------------------------------------------------------------------------------------------|------------------------------------------------|------------------------------------------------------------------|---------------------------------------|---------|--------------------------------------------------------------------------------------------------------------------------------------------------------------------------------------|
|                  |                                                                                                                                                                               |                                                |                                                                  |                                       |         | compliance, these key areas need to be addressed (ideally) before launching an ERAS programme, and then carefully managed throughout                                                 |
| Berthelsen et al | Qualitative study to illuminate orthopaedic nurses' perceptions and experiences of providing individual nursing care for older patients in standardised fast-track programmes | Orthopaedic surgery (hip and knee replacement) | Semi-structured interviews. Manifest and latent content analysis | 10 interviews with orthopaedic nurses | Denmark | Conclusion: nurses felt they had to compromise their nursing care and ethics in order to comply with the fast-track programme and implement the standardised care that it recommends |



1  
2  
3  
4  
5  
6  
7  
8  
9 The sample sizes ranged from 8 to 63. The studies focus on the implementation and delivery of ERAS  
10 across a variety of clinical contexts: four on colorectal surgery[19,20,21,22], one on gastrointestinal  
11 surgery[23], one on abdominal hysterectomy[24], and two on orthopaedics[25]. Participants  
12 included in the studies were a wide range of Multidisciplinary Team and Allied Health Professional  
13 staff, and therefore incorporate a diverse range of clinical and professional perspectives. These  
14 include registrars, consultants, surgeons, anaesthetists, doctors, nurses and physiotherapists, as well  
15 as nursing managers, ERAS coordinators, care coordinators and service improvement  
16 coordinators[21]. Participants in one study were recruited specifically because of their role as local  
17 ERAS champions[20]. Individual semi-structured interviews were used for data collection in all eight  
18 studies. Two studies conducted focus groups as well as interviews[24], and one also collected and  
19 analysed memos and reflective journals completed by participants[23]. The different methodologies  
20 used in the included studies emphasise the usefulness of this review in drawing together a range of  
21 perspectives on staff experiences of implementing ERAS programmes. Despite their different  
22 contexts and surgical populations, the findings from the included studies were largely consistent  
23 with one another.

24  
25  
26  
27  
28  
29  
30  
31  
32  
33  
34  
35  
36  
37  
38  
39  
40  
41  
42 Analysis yielded five themes which are shown in Table 1: communication and collaboration,  
43 resistance to change, role and significance of protocol-based care, knowledge and expectations, and  
44 temporality. The themes identify the key elements of health professionals' experiences of and  
45 perspectives on participation in an ERAS pathway. Each theme is described in turn.

#### 50 **Theme 1: Communication and collaboration**

51  
52 Findings from all of the studies emphasised that the successful integration of ERAS practices  
53 depends upon effective multidisciplinary team (MDT) communication, and a shared willingness to  
54  
55  
56  
57

1  
2  
3 collaborate. Where this worked well, comprehensive education for staff and patients about ERAS, as  
4  
5 well as clear and effective dissemination of knowledge and information were felt to be contributing  
6  
7 factors. The high turnover of MDT staff was cited as presenting a challenge to this process, and it  
8  
9 was suggested that providing a 'thorough introduction'[24] about ERAS principles to new staff  
10  
11 helped to improve matters. Good team work was also seen to be crucial[22], since this helped to  
12  
13 foster an environment in which discipline or intervention specific concerns[19], and issues relating to  
14  
15 staff and practice[21] could be addressed. Strong team communication was also seen as a means of  
16  
17 mitigating staff confusion about ERAS[21]: specific areas identified as requiring improvement were  
18  
19 communications between nurses and surgeons[19], dialogue between staff and patients, in which  
20  
21 the compressed and information-filled approach of ERAS can prove especially challenging[24].  
22  
23 Having a small clinical community and a close-knit team was recognised as creating a good basis for  
24  
25 effective organisational interactions[22].  
26  
27  
28  
29

30 Staff also drew attention to the challenges of coordinating the various aspects of the ERAS  
31  
32 programme, and maintaining a good collaborative approach to this within the MDT[23]: indeed,  
33  
34 there were concerns that a lack of coordination across different clinical departments served to  
35  
36 jeopardise ongoing consistency of practice[22], and it was felt that the provision of feedback and  
37  
38 audits to hospital stakeholders[20] was a valuable communicative resource in this respect.  
39  
40 For staff working as champions, building good relationships in and across participating ERAS centres  
41  
42 was essential for the successful integration of the programme. They recognised that such  
43  
44 relationships served to encourage communication about - and, thereby, establish better shared  
45  
46 understandings of current practices on the ground[20], and raise awareness about ERAS  
47  
48 guidelines[22] by making sure that everyone is onboard. It was felt that ERAS programmes were  
49  
50 most effectively introduced using a bottom up, as opposed to a top down approach[20]. Champions  
51  
52 indicated that staff were more likely to engage positively with the integration of ERAS practices  
53  
54  
55  
56  
57  
58  
59  
60

1  
2  
3 where they are able to be involved in co-creating them from the ground up, since this collaborative  
4  
5 endeavour helped to foster a collective sense of responsibility[20].  
6  
7

### 8 9 **Theme 2: Resistance to change**

10  
11 Data from the studies included in this review highlighted how *resistance to change* amongst staff  
12  
13 had presented a major challenge to the implementation of ERAS at both collective and individual  
14  
15 levels. It was noted, for instance, that introducing and implementing the programme requires a  
16  
17 culture change[19,20] for staff, which they expect to find big and dramatic[23]. Concerns about the  
18  
19 unfamiliarity of new working practices can lead to negative attitudes and a reluctance to engage  
20  
21 with ERAS guidelines[23], whilst a fundamental dislike of change more widely also provokes  
22  
23 disinclination[19,22]. The scope and intensity of the resistance described here is also motivated by  
24  
25 staff age and experience[21]. Newer nurses, for instance, found it easier to adjust to the programme  
26  
27 and tended to do so more quickly than those who were seen to be stuck in old ways[23].  
28  
29  
30

31  
32 Appointing a “champion” was recognised as having been extremely helpful in terms of encouraging  
33  
34 positive attitudes and effective collaboration when implementing ERAS programmes[19,20,26]. Staff  
35  
36 taking up this, or a similar, role were appointed from a range of MDT disciplines, and included a  
37  
38 ward based designated ERAS nurse[23] and an ERAS coordinator[21]. From the perspective of the  
39  
40 champions themselves, meanwhile, resistance was conceptualised less broadly and in more precise  
41  
42 terms: attributing this, for instance, to a lack of agreement about specific interventions rather than  
43  
44 wider processes[20]. They also felt that even where MDTs were, on the whole, easily accepting of  
45  
46 ERAS guidelines, there could still be individual level resistance[20] from some staff.  
47  
48  
49  
50

### 51 **Theme 3: Role and significance of protocol based care**

52  
53 Staff recognised that working to evidence based guidelines and related protocols can in principle be  
54  
55 helpful, because doing so “provides a framework to optimise patient flow by examining what should  
56  
57

1  
2  
3 be done, when, and by whom, thereby reducing delays for patients”[23: p.30] standardising  
4  
5 practices, reducing variations in treatment, and thereby ostensibly improving the quality of patient  
6  
7 care. In practice, however, there were mixed feelings amongst MDT staff as to whether or not this  
8  
9 was the case in relation to delivering ERAS interventions. Surgeons felt that these were easily  
10  
11 implementable as long as they were based on best evidence and incorporated in standardised order  
12  
13 sets[19], whilst anaesthesiologists acknowledged that although they were not currently following a  
14  
15 standardised protocol, they were open to the idea of implementing standardised guidelines[19].  
16  
17 There was also agreement amongst MDT staff that the implementation of the ERAS programme  
18  
19 would provide consistency across working practices[22].  
20  
21  
22  
23

24 The studies highlighted several challenges of “fittingness” in relation to ERAS programmes,  
25  
26 emphasising the relevance of institutional, organisational and patient factors. Champions noted that  
27  
28 ERAS pathways are not definitively prescriptive, and that this leads to variability in how they  
29  
30 ultimately become integrated into and operationalised within a site’s existing clinical systems[20].  
31  
32 One study found that needing to modify or deviate from ERAS protocols could create confusion for  
33  
34 staff[21]. Difficulties in fitting high numbers of patients into the timescales recommended for length  
35  
36 of hospital stay under ERAS were also cited as a challenge. Nursing staff seemed to experience the  
37  
38 greatest impact of these particular challenges on their day to day work, in which they were faced  
39  
40 with the reality that some patients do not and cannot comply with ERAS requirements and do not  
41  
42 “fit” standard care trajectories, because they are too frail and old, or have very high levels of  
43  
44 comorbidity, and are simply too unwell[21,25]. Such issues presented ethical as well as logistical  
45  
46 difficulties for nursing staff. Some described feeling highly conflicted about the tensions they  
47  
48 experienced in striving to achieve the standardised care targets of ERAS protocols whilst also  
49  
50 upholding their ideals of nursing practice[25]. They felt that they were having to make compromises  
51  
52 in their work, and experienced this as a struggle. Particular concerns were raised about the  
53  
54 detrimental impact that this was having upon nurses’ capacity for providing adequately  
55  
56  
57  
58  
59  
60

1  
2  
3 individualised care for patients[25], and the notion of having one protocol for all[23] was felt to be  
4  
5 unsatisfactory. Nursing staff felt that the absence of clear guidance about when and how to default  
6  
7 or deviate from ERAS protocols led them to be overly cautious in their work, and they indicated that  
8  
9 better defined and more precise inclusion criteria about which patients to drive through recovery  
10  
11 would be helpful[23].  
12

#### 15 **Theme 4: Knowledge and expectations**

17 Staff recognised that a good knowledge and understanding of ERAS is crucial if it is to be successfully  
18  
19 implemented, although the scope of this requirement transcends the procedural details and  
20  
21 pragmatic instructions provided by ERAS protocols themselves. Rather, it was important for staff to  
22  
23 have a good grasp of its wider aims and objectives[23], and to believe in the value and (potentially)  
24  
25 positive impact of the intervention[20,23]. Three of the studies found that, on the whole, staff did  
26  
27 feel positive about and favourable towards the implementation of ERAS[19,20,22], and one study  
28  
29 showed that although staff were sceptical about it prior to implementation, they felt more positive  
30  
31 having seen how well ERAS worked in practice[24]. In all the studies, however, staff acknowledged  
32  
33 that considerable challenges still exist and that these will need to be overcome. The nature of such  
34  
35 concerns varied for staff, depending upon their own MDT specialty, since this had impact upon the  
36  
37 way in which they engaged with ERAS practices in their everyday work. Nurses, in particular,  
38  
39 described feeling cautious and sceptical about implementing ERAS because of a lack of confidence,  
40  
41 indecision, and anxieties about being challenged by other members of the MDT during ward rounds.  
42  
43 They were also worried about any potentially adverse consequences for patients of progressing their  
44  
45 recovery in accordance with ERAS[23]. Tacit knowledge was also understood to be important for  
46  
47 nurses for their role in implementing ERAS: this helped them to take a common sense[23] approach  
48  
49 to the process, especially in terms of knowing when it was appropriate to deviate from ERAS  
50  
51 guidelines[23,25].  
52  
53  
54  
55  
56  
57  
58  
59  
60

1  
2  
3 Setting and effectively managing expectations was a key concern for health professionals in helping  
4 them to build shared understandings around ERAS, and to understand their own individual tasks and  
5 responsibilities. The expectations of both professionals and patients (and negotiations of the two)  
6 were relevant here. Staff felt that they themselves benefitted from setting clear patient  
7 expectations[19], and were also keenly aware of some of the complex difficulties in collective  
8 understandings of what was expected from whom, when, and in which ways across the MDT, where  
9 various parties “made an effort to fulfil the other’s expectations in the situation, but from different  
10 perspectives and different understandings of the same situation”[24: p.420].  
11  
12  
13  
14  
15  
16  
17  
18  
19  
20  
21

22 Pearsall et al.[19] note that staff expectations - of self and others - differ across the MDT and,  
23 importantly, explore how these are linked to (sometimes incorrect) assumptions made by some staff  
24 about the knowledge and expectations of their colleagues, creating uncertainty and ambivalence  
25 around ERAS implementation. For instance, where nurses anticipated that some surgeons might  
26 resist ERAS recommendations, surgeons thought that nursing culture and lack of nursing time would  
27 present a problem. Anaesthetists, meanwhile, were concerned that patients would not understand  
28 ERAS guidelines and procedures, and assumed that it would be very difficult to amend existing and  
29 well-established nursing culture and surgeon behaviours. The surgeons themselves were  
30 unconvinced as to whether changes made in accordance with ERAS would make any difference to  
31 patients’ experiences of the surgical pathway.  
32  
33  
34  
35  
36  
37  
38  
39  
40  
41  
42  
43  
44

45 Staff acknowledged that their expectations about ERAS timeframes should be realistic[23], that is,  
46 accepting of the reality that some patients would be unable to achieve recovery according to the  
47 goals prescribed in the protocol. Whilst some nurses conceptualised such non-achievement as a  
48 failure of the [ERAS] programme[23], however, others saw the patients themselves as being  
49 responsible for this, on account of them being unprepared for a short hospital stay or early  
50 mobilisation, and feeling disproportionately anxious about the process[25]. Staff recognised the  
51  
52  
53  
54  
55  
56  
57  
58  
59  
60

1  
2  
3 extent to which good pre-operative education is helpful for patients, but noted that they  
4  
5 nevertheless have to deal with problems arising where patients have unrealistic expectations, forget  
6  
7 important information, or simply will not comply with ERAS instructions[21]. It was also felt that  
8  
9 some patients might be unable to understand the information and instructions that they received,  
10  
11 creating difficulties for MDT staff[22].  
12  
13  
14

### 15 **Theme 5: Temporality**

16  
17 Temporality is highlighted as being important in findings from the studies: the successful embedding  
18  
19 of ERAS is described, for instance, as a process that requires a slow but steady approach, becoming  
20  
21 normalised over time, until it is established as the standard of care [so that] there's nothing to talk  
22  
23 about[20]. The attitudes of staff towards ERAS programmes also changed over time, typically  
24  
25 becoming more favourable as the integration continued[24], and nursing staff were keen to reflect  
26  
27 on this, recognising how long it had taken them, to see ERAS practices as routine and second  
28  
29 nature[23]. Some of the primary challenges identified to the effective ongoing integration of ERAS,  
30  
31 meanwhile, were factors relating to a perceived lack of the resources (within and external to local  
32  
33 sites) required to maintain the programme over time. These included a lack of adequate finances,  
34  
35 limited space, a shortage of equipment, and too few nursing staff[22], as well as poor administrative  
36  
37 support for the programme[20]. Insufficient community support for discharge procedures and  
38  
39 arrangements was also cited as a hindrance to successful embedding of ERAS. Temporality also  
40  
41 relates in part to the point at which data was collected in the included studies. This means that the  
42  
43 different findings they report also reflect the different stages of ERAS implementation being studied,  
44  
45 i.e. before, during or after implementation of the ERAS programme [19].  
46  
47  
48  
49  
50  
51  
52

## 53 **DISCUSSION**

1  
2  
3 Our meta-synthesis of qualitative studies produced five themes, which reflect key considerations  
4 described by health professionals in relation to their experiences of delivering ERAS pathways. These  
5 themes were communication and collaboration, resistance to change, role and significance of  
6 protocol-based care, knowledge and expectations, and temporality. Staff emphasised that there  
7 must be effective MDT collaboration and communication, if ERAS practices are to be successfully  
8 implemented and integrated. This included providing a thorough education to staff and patients  
9 about ERAS, and ensuring that information and knowledge about it was clearly and consistently  
10 disseminated across the MDT. The coordination of ERAS approaches was acknowledged to be  
11 challenging, and the appointment of a designated ERAS champion was experienced as being helpful  
12 in this respect.  
13  
14  
15  
16  
17  
18  
19  
20  
21  
22  
23  
24  
25

26 The value of evidence based guidelines was described as useful means of helping to improve patient  
27 care by bringing about a standardisation of practices and a reduction in variations in treatment, but  
28 staff were ambivalent about the extent to which ERAS created such consistencies in practice.  
29  
30  
31

32 Concerns were raised about the necessity of modifying or deviating from ERAS guidelines, where  
33 these did not “fit” with local site systems or with the care requirements of individual patients. A  
34 need for more precise information about how best to do this was identified.  
35  
36  
37  
38  
39  
40

41 A comprehensive knowledge and understanding of ERAS was cited as being essential to its successful  
42 implementation: in terms of both procedural detail and the broader aims and objectives that  
43 underpin the intervention itself. Staff were concerned about the impact of ERAS upon their own  
44 everyday working practices, and in relation to their own speciality within the MDT. Staff  
45 expectations about ERAS varied across MDT disciplines, and the need to set and manage these  
46 effectively was prioritised. The importance of establishing ‘realistic’ expectations was emphasised  
47 for staff and also the patients for whom they care. This is a key finding that underpins the need for  
48 clear guidance to staff who are delivering ERAS.  
49  
50  
51  
52  
53  
54  
55  
56  
57  
58  
59  
60



1  
2  
3  
4  
5 The implementation and embedding of ERAS was understood to require complex processes of  
6  
7 adjustment, acceptance and engagement for staff, constituting a process that evolves gradually over  
8  
9 time. Staff attitudes towards ERAS were also subject to temporal change, and tended to become  
10  
11 increasingly favourable via reflections upon how well the new and or amended practices were  
12  
13 working, and the ways in which they became 'normalised'.  
14  
15

16  
17 Given that ERAS seeks to improve patients' outcomes through consistency in care, findings from our  
18  
19 review highlight that, whilst health professionals are confident that ERAS pathways have the  
20  
21 potential to achieve this, some key improvements are needed. The findings of this review are new  
22  
23 because they highlight key and common themes that appear in all delivery of ERAS in diverse  
24  
25 contexts. They also build upon existing knowledge about ERAS by showing that the pathway is  
26  
27 implemented disparately across different settings, according to local contexts and circumstances[4],  
28  
29 and that the provision of better information and education to staff and patients can achieve better  
30  
31 consistency. Our review also indicates that health professionals cite resistance to change amongst  
32  
33 staff as a hindrance to the effective implementation of ERAS[6], Our findings demonstrate that  
34  
35 effective collaboration and communication amongst staff – and between staff and patients – helps  
36  
37 to improve the effectiveness of ERAS[5] and, again, good clear guidance could help with this. This  
38  
39 review also observes that staff use different strategies of discursive framing to describe their  
40  
41 experiences of implementing and engaging with ERAS practices, which indicate that temporality is an  
42  
43 important factor in this respect. These include accounts of adapting to, adjusting to, and coming  
44  
45 around to the programme[23], adopting the pathway[19], being accepting of it[20], and compliance  
46  
47 with ERAS guidelines[21]. From a discursive psychological perspective – which focuses upon social  
48  
49 construction through language[27], these framings illustrate how the implementation of ERAS is  
50  
51 produced through talk[28] as a gradual process which evolves over time. The most important finding  
52  
53 from the included studies is that appointing a dedicated Enhanced Recovery "champion" helps to  
54  
55  
56  
57

1  
2  
3 mitigate many of the barriers to the effective implementation of ERAS [7]. The studies indicate that  
4 this improves MDT communication and collaboration, assists the provision of consistent information  
5 and education to staff and patients, and helps to alleviate resistance to change and lack of  
6 confidence amongst staff when they are faced with new working practices brought about by ERAS  
7 protocols. This is the key implication of this review, and an important message for future practice.  
8  
9  
10  
11  
12

13  
14  
15 We conducted the systematic review in a manner that was designed to capture as many studies as  
16 possible by using keywords that were identified and refined from existing literature. To enhance  
17 rigour in study selection the included studies were all appraised by the two authors. This process  
18 acted as a screening process that allowed us to exclude three studies and retain eight as well as  
19 appraise whether the included studies sufficiently addressed the ten questions from the CASP  
20 qualitative checklist. Assessment using the CASP checklist can be conducted in a variety of ways and  
21 our process enabled us to define all studies to be of sufficient quality. To improve reporting quality  
22 of this review, we have adhered to the ENTREQ guidance on the reporting of qualitative  
23 syntheses[29]. The reflexive approach of the authors in the selection process sought to minimise  
24 researcher bias.  
25  
26  
27  
28  
29  
30  
31  
32  
33  
34  
35  
36  
37

38 One of the strengths of this review is that it includes a range of different studies, and therefore  
39 incorporates a variety of populations and geographical contexts. Further strengths are the diversity  
40 of methodological approaches used in the studies, and the different clinical contexts and local  
41 environments of the included studies. This provides a richness of perspectives. Additionally, there  
42 are few existing systematic reviews of qualitative studies on staff experiences of ERAS. This paper  
43 therefore makes a valuable contribution to the field of literature. A limitation of this review is the  
44 small number of included studies, however, we included studies in six countries across four surgical  
45 specialities and as such our work highlights key issues that are transferable between contexts.  
46  
47  
48  
49  
50  
51  
52  
53  
54

55 Another limitation is that there are no ethnographic studies included in our review and, as such, it  
56  
57

1  
2  
3 does not benefit from the use of observational data on the implementation of ERAS. We suggest  
4  
5 that future research could build upon existing knowledge of and understanding about staff  
6  
7 perspectives of ERAS by taking an ethnographic approach. We also note that ERAS pathways are now  
8  
9 being implemented in elective orthopaedic surgery, and suggest that this is a valuable area for  
10  
11 future study.  
12

## 13 14 15 **CONCLUSION**

16  
17 We reviewed and synthesised qualitative studies that explore health professionals' experiences of  
18  
19 and perspectives on the enhanced recovery after surgery (ERAS) pathway. This is the first systematic  
20  
21 review to draw together findings from qualitative studies with health professionals, and to inform  
22  
23 implementation of ERAS we would argue that their experiences and views are crucial. Findings from  
24  
25 our review indicate that, whilst staff generally feel positive about the implementation of ERAS, they  
26  
27 acknowledge that the process is complex and challenging. Many of the challenges identified, such as  
28  
29 resistance to change and lack of confidence can however be mitigated by ensuring that MDTs  
30  
31 understand ERAS principles and guidelines, and that they communicate well with one another and  
32  
33 with patients. Other challenges, such as a lack of local resources and high rates of comorbidity  
34  
35 amongst patients are perhaps more challenging to address. We suggest that the provision of  
36  
37 comprehensive, coherent and locally relevant information to health professionals would help to  
38  
39 improve the implementation and delivery of ERAS pathways. Identifying and recruiting an ERAS  
40  
41 champion is also recommended as means of improving the effectiveness of the pathway.  
42  
43  
44  
45  
46

## 47 **A: CONTRIBUTORSHIP STATEMENT**

48  
49 The authors of this article are Dr Rachel Cohen (RC) and Professor Rachael Goberman-Hill (RGH).  
50  
51 Both authors made substantial contributions to the conception and the design of the systematic  
52  
53 review. Literature searches were conducted by RC, and RGH carried out the CASP screening. Both RC  
54  
55 and RGH contributed to the extraction, analysis and interpretation of data from the papers included  
56  
57  
58  
59  
60

1  
2  
3 in the review. RC and RGH worked on drafts of the review, made revisions and agreed on a final  
4  
5 version for publication. Both RC and RGH agree to be accountable for all aspects of the work in  
6  
7 ensuring that questions related to the accuracy or integrity of any part of the work are appropriately  
8  
9 investigated and resolved.  
10

11  
12  
13  
14 Support for the study was received from the Oxford NIHR Biomedical Research Centre, Nuffield  
15  
16 Orthopaedic Centre, University of Oxford. The views and opinions expressed therein are those of the  
17  
18 authors and do not necessarily reflect those of the HS&DR Programme, NIHR, NHS or the  
19  
20 Department of Health. We thank the wider team for the study, including Professor Andrew Judge as  
21  
22 Principal Investigator. We also thank Christine Hobson for her work in support of our research.  
23  
24  
25

#### 26 27 **B: COMPETING INTERESTS**

28  
29 The author and co-author have no competing interests to declare  
30  
31  
32

#### 33 34 **C: FUNDING**

35  
36 This review forms part of the dissemination strategy for the Atlas (Ethnographic study of care  
37  
38 pathways for hip and knee replacement) project, which is funded by the National Institute for Health  
39  
40 Research Health Services and Delivery Research Programme (project number 14/46/02).  
41  
42

#### 43 44 **D: DATA SHARING STATEMENT**

45  
46 Data for the study may be made available from University of Bristol's research data  
47  
48 repository under a controlled access arrangement. Requests for access will be referred to  
49  
50 the University's data access committee before data can be shared under a data sharing  
51  
52 agreement. As such, anonymous data from the study may be seen and used by other  
53  
54 researchers, for ethically approved research projects, on the understanding that  
55  
56  
57

1  
2  
3 confidentiality will be maintained. Release of the data will be at the discretion of the data  
4  
5 access committee (data custodian).  
6  
7  
8  
9  
10  
11  
12  
13  
14  
15  
16  
17  
18  
19  
20  
21  
22  
23  
24  
25  
26  
27  
28  
29  
30  
31  
32  
33  
34  
35

## 36 REFERENCES

- 37  
38  
39  
40  
41 1. Kehlet H. Fast-track colorectal surgery. *The Lancet* 2008;371:791-3.  
42  
43  
44 2. Department of Health. Enhanced Recovery Partnership Programme Project Report. March  
45 2011. Available from: [https://www.gov.uk/government/publications/enhanced-recovery-](https://www.gov.uk/government/publications/enhanced-recovery-partnership-programme)  
46 [partnership-programme](https://www.gov.uk/government/publications/enhanced-recovery-partnership-programme) (accessed 1 Feb 2017).  
47  
48  
49 3. Campbell NC, Murray E, Darbyshire J, *et al*. Designing and evaluating complex interventions to  
50  
51 improve health care. *BMJ* 2007;334:455-9.  
52  
53  
54  
55  
56  
57  
58  
59  
60

- 1  
2  
3 4. Craig P, Dieppe P, Macintyre S, *et al.* Developing and Evaluating Complex Interventions: The New  
4  
5 Medical Research Council Guidance. *BMJ* 2008;337:979-83.  
6  
7
- 8  
9 5. Waring J, Marshall F, Bishop S, *et al.* An ethnographic study of knowledge sharing across the  
10  
11 boundaries between care processes, services and organisations: the contributions to 'safe' hospital  
12  
13 discharge. *Health Serv Deliv Res* 2014;2;1-160.  
14  
15
- 16  
17 6. Moore G, Audrey S, Barker M, *et al.* Process evaluation in complex public health intervention  
18  
19 studies: the need for guidance. *J Epidemiol Community Health* 2014;68:101-2.  
20  
21  
22
- 23  
24 7. Paton F, Chambers D, Wilson P, *et al.* Effectiveness and implementation of enhanced recovery  
25  
26 after surgery programmes: a rapid evidence synthesis. *BMJ Open* 2014;4:e005015.  
27  
28 doi:10.1136/bmjopen-2014-005015.  
29  
30  
31
- 32  
33 8. Bernard H, Foss M. The impact of the enhanced recovery after surgery (ERAS) programme on  
34  
35 community nursing. *Br J Community Nurs* 2014;19:184-8.  
36  
37
- 38  
39 9. Blazeby JM, Soulsby M, Winstone K, *et al.* A qualitative evaluation of patients' experiences of an  
40  
41 enhanced recovery programme for colorectal cancer. *Colorectal Dis* 2010;12:e236-42.  
42  
43  
44
- 45  
46 10. Hunt GR, Hall GM, Murthy BV, *et al.* Early Discharge Following hip Arthroplasty: Patients'  
47  
48 acceptance masks doubts and concerns. *Health Expect* 2009;12:130-7.  
49  
50
- 51  
52 11. Husted H, Holm G. Fast track in total hip and knee arthroplasty - experiences from Hvidovre  
53  
54 University Hospital, Denmark. *Injury* 2006;37(Suppl 5):S31-S35.  
55  
56  
57

- 1  
2  
3 12. Norlyk A. The experience of fast track postoperative rehabilitation regimen: the patients'  
4 perspective. *Klinisk Sygepleje* 2008;22:53-63.  
5  
6  
7  
8  
9 13. Norlyk A, Harder I. After colonic surgery: The lived experience of participating in a fast-track  
10 programme. *Int J Qual Stud on Health Well-being* 2009;4:170-180.  
11  
12  
13  
14  
15 14. Sibbern T, Bull Sellevold V, Steindal SA, *et al.* Patients' Experiences of Enhanced Recovery after  
16 Surgery: a systematic review of qualitative studies. *J Clin Nurs* 2017;26:1172-188.  
17  
18  
19  
20  
21  
22 15. Critical Skills Appraisal Programme. *CASP Qualitative Checklist*. Available from: [http://www.casp-](http://www.casp-uk.net/checklists)  
23 [uk.net/checklists](http://www.casp-uk.net/checklists) (accessed 30 May 2018).  
24  
25  
26  
27  
28 16. Polit DF, Beck CT. *Nursing Research: Generating and Assessing Evidence for Nursing Practice*.  
29 Philadelphia: Wolters Kluwer/Lippincott Williams and Wilkins; 2008.  
30  
31  
32  
33  
34 17. Graneheim UH, Lundman B. Qualitative content analysis in nursing research: concepts,  
35 procedures and measures to achieve trustworthiness. *Nurse Educ Today* 2004;24:105-12.  
36  
37  
38  
39  
40 18. Uhrenfeldt L, Aagaard H, Hall EO, *et al.* A qualitative meta-synthesis of patients' experiences of  
41 intra- and inter-hospital transitions. *J Adv Nurs* 2013;69:1678-90.  
42  
43  
44  
45  
46  
47 19. Pearsall EA, Meghiji A, Pitzul KB, *et al.* A Qualitative Study to Understand the Barriers and  
48 Enablers in Implementing an Enhanced Recovery after Surgery Program. *Ann Surg* 2015;261:92-6.  
49  
50  
51  
52  
53  
54  
55  
56  
57  
58  
59  
60

- 1  
2  
3 20. Gotlib Conn L, McKenzie M, Pearsall EA, *et al.* Successful implementation of an enhanced  
4 recovery after surgery programme for elective colorectal surgery: a process evaluation of  
5 champions' experiences. *Implement Sci* 2015;10:99.  
6  
7  
8  
9  
10  
11 21. Lyon A, Solomon MJ, Harrison JD. A Qualitative Study Assessing the Barriers to Implementation  
12 of Enhanced Recovery after Surgery. *World J Surg* 2014;38:1374-80.  
13  
14  
15  
16  
17 22. Alawadi ZM, Leal I, Phatak UR, *et al.* Facilitators and barriers of implementing enhanced  
18 recovery in colorectal surgery at a safety net hospital: A provider and patient perspective. *Surgery*  
19 2016;159:700-12.  
20  
21  
22  
23  
24  
25  
26 23. Jeff A, Taylor C. Ward nurses' experiences of enhanced recovery after surgery: a grounded  
27 theory approach. *Gastrointestinal Nursing* 2014;12:23-31.  
28  
29  
30  
31  
32 24. Wagner L, Carlslund AM, Moller C, *et al.* Patient and staff (doctors and nurses) experiences of  
33 abdominal hysterectomy in accelerated recovery programme: A qualitative study. *Dan Med Bull*  
34 2004;51:418-21.  
35  
36  
37  
38  
39  
40  
41 25. Berthelsen CB, Frederiksen K. Orchestrating care through the fast track perspective: A  
42 qualitative content analysis of the provision of individualised nursing care in orthopaedic fast-track  
43 programmes. *Int J Orthop Trauma Nurs* 2017;24:40-9.  
44  
45  
46  
47  
48  
49 26. Sjetne IS, Krogstad U, Odegard, S, *et al.* Improving quality by introducing enhanced recovery  
50 after surgery in a gynaecological department: consequences for ward nursing practice. *Qual Saf*  
51 *Health Care*; 2009;18;236-40.  
52  
53  
54  
55  
56  
57  
58  
59  
60



1  
2  
3 27. Wiggins S, Potter J. Discursive Psychology. In: Willig C, Hollway SR, eds. *Handbook of Qualitative*  
4  
5 *Research*. London:Sage 2008:72-89.

6  
7  
8  
9 28. Potter J, Wetherell M. *Discourse and Social Psychology: Beyond Attitudes and Behaviour*.  
10  
11 London: Sage, 1987.

12  
13  
14  
15 29. Tong A, Flemming K, McInnes *et al*. Enhancing transparency in reporting the synthesis of  
16  
17 qualitative research: ENTREQ. *BMC Med Res Methodol* 2012;12:181.

18  
19  
20  
21  
22  
23  
24  
25  
26  
27  
28  
29  
30  
31  
32  
33  
34  
35  
36  
37  
38  
39  
40  
41  
42  
43  
44  
45  
46  
47  
48  
49  
50  
51  
52  
53  
54  
55  
56  
57  
58  
59  
60

peer review only



## PRISMA 2009 Flow Diagram

### Staff experiences of Enhanced Recovery after Surgery – Systematic Review of Qualitative Studies

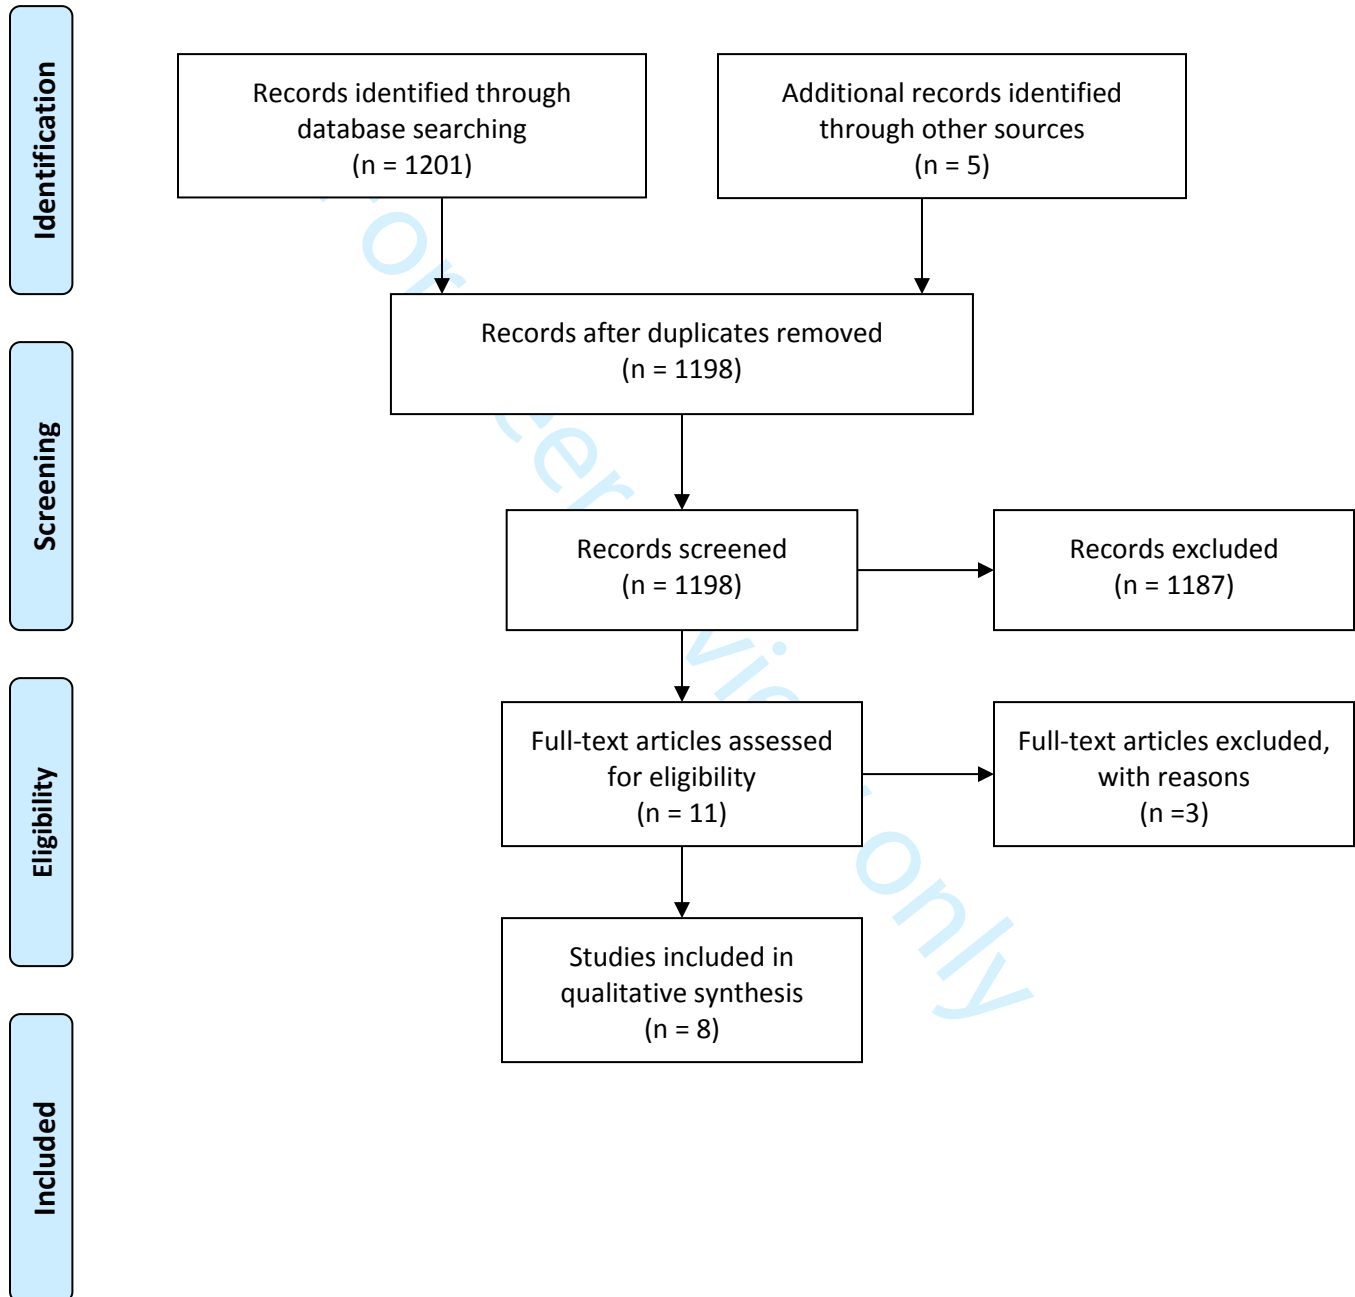

From: Moher D, Liberati A, Tetzlaff J, Altman DG, The PRISMA Group (2009). Preferred Reporting Items for Systematic Reviews and Meta-Analyses: The PRISMA Statement. PLoS Med 6(7): e1000097. doi:10.1371/journal.pmed1000097

For more information, visit [www.prisma-statement.org](http://www.prisma-statement.org).

For peer review only - <http://bmjopen.bmj.com/site/about/guidelines.xhtml>

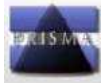

# PRISMA 2009 Checklist

| Section/topic                      | #  | Checklist item                                                                                                                                                                                                                                                                                              | Reported on page # |
|------------------------------------|----|-------------------------------------------------------------------------------------------------------------------------------------------------------------------------------------------------------------------------------------------------------------------------------------------------------------|--------------------|
| <b>TITLE</b>                       |    |                                                                                                                                                                                                                                                                                                             |                    |
| Title                              | 1  | Identify the report as a systematic review, meta-analysis, or both.                                                                                                                                                                                                                                         | 1                  |
| <b>ABSTRACT</b>                    |    |                                                                                                                                                                                                                                                                                                             |                    |
| Structured summary                 | 2  | Provide a structured summary including, as applicable: background; objectives; data sources; study eligibility criteria, participants, and interventions; study appraisal and synthesis methods; results; limitations; conclusions and implications of key findings; systematic review registration number. | 2                  |
| <b>INTRODUCTION</b>                |    |                                                                                                                                                                                                                                                                                                             |                    |
| Rationale                          | 3  | Describe the rationale for the review in the context of what is already known.                                                                                                                                                                                                                              | 4                  |
| Objectives                         | 4  | Provide an explicit statement of questions being addressed with reference to participants, interventions, comparisons, outcomes, and study design (PICOS).                                                                                                                                                  | 5                  |
| <b>METHODS</b>                     |    |                                                                                                                                                                                                                                                                                                             |                    |
| Protocol and registration          | 5  | Indicate if a review protocol exists, if and where it can be accessed (e.g., Web address), and, if available, provide registration information including registration number.                                                                                                                               | 5                  |
| Eligibility criteria               | 6  | Specify study characteristics (e.g., PICOS, length of follow-up) and report characteristics (e.g., years considered, language, publication status) used as criteria for eligibility, giving rationale.                                                                                                      | 6                  |
| Information sources                | 7  | Describe all information sources (e.g., databases with dates of coverage, contact with study authors to identify additional studies) in the search and date last searched.                                                                                                                                  | 5,6                |
| Search                             | 8  | Present full electronic search strategy for at least one database, including any limits used, such that it could be repeated.                                                                                                                                                                               | 5,6                |
| Study selection                    | 9  | State the process for selecting studies (i.e., screening, eligibility, included in systematic review, and, if applicable, included in the meta-analysis).                                                                                                                                                   | 5,6,7              |
| Data collection process            | 10 | Describe method of data extraction from reports (e.g., piloted forms, independently, in duplicate) and any processes for obtaining and confirming data from investigators.                                                                                                                                  | 6-9                |
| Data items                         | 11 | List and define all variables for which data were sought (e.g., PICOS, funding sources) and any assumptions and simplifications made.                                                                                                                                                                       | 6-9                |
| Risk of bias in individual studies | 12 | Describe methods used for assessing risk of bias of individual studies (including specification of whether this was done at the study or outcome level), and how this information is to be used in any data synthesis.                                                                                      | 6-9                |
| Summary measures                   | 13 | State the principal summary measures (e.g., risk ratio, difference in means).                                                                                                                                                                                                                               | N/A                |
| Synthesis of results               | 14 | Describe the methods of handling data and combining results of studies, if done, including measures of consistency (e.g., $I^2$ ) for each meta-analysis.                                                                                                                                                   | 6-9                |

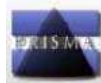

# PRISMA 2009 Checklist

Page 1 of 2

| Section/topic                 | #  | Checklist item                                                                                                                                                                                           | Reported on page # |
|-------------------------------|----|----------------------------------------------------------------------------------------------------------------------------------------------------------------------------------------------------------|--------------------|
| Risk of bias across studies   | 15 | Specify any assessment of risk of bias that may affect the cumulative evidence (e.g., publication bias, selective reporting within studies).                                                             | N/A                |
| Additional analyses           | 16 | Describe methods of additional analyses (e.g., sensitivity or subgroup analyses, meta-regression), if done, indicating which were pre-specified.                                                         | N/A                |
| <b>RESULTS</b>                |    |                                                                                                                                                                                                          |                    |
| Study selection               | 17 | Give numbers of studies screened, assessed for eligibility, and included in the review, with reasons for exclusions at each stage, ideally with a flow diagram.                                          | 6,7                |
| Study characteristics         | 18 | For each study, present characteristics for which data were extracted (e.g., study size, PICOS, follow-up period) and provide the citations.                                                             | 10-12              |
| Risk of bias within studies   | 19 | Present data on risk of bias of each study and, if available, any outcome level assessment (see item 12).                                                                                                | N/A                |
| Results of individual studies | 20 | For all outcomes considered (benefits or harms), present, for each study: (a) simple summary data for each intervention group (b) effect estimates and confidence intervals, ideally with a forest plot. | N/A                |
| Synthesis of results          | 21 | Present results of each meta-analysis done, including confidence intervals and measures of consistency.                                                                                                  | N/A                |
| Risk of bias across studies   | 22 | Present results of any assessment of risk of bias across studies (see Item 15).                                                                                                                          | N/A                |
| Additional analysis           | 23 | Give results of additional analyses, if done (e.g., sensitivity or subgroup analyses, meta-regression [see Item 16]).                                                                                    | N/A                |
| <b>DISCUSSION</b>             |    |                                                                                                                                                                                                          |                    |
| Summary of evidence           | 24 | Summarize the main findings including the strength of evidence for each main outcome; consider their relevance to key groups (e.g., healthcare providers, users, and policy makers).                     | 19-21              |
| Limitations                   | 25 | Discuss limitations at study and outcome level (e.g., risk of bias), and at review-level (e.g., incomplete retrieval of identified research, reporting bias).                                            | 21,22              |
| Conclusions                   | 26 | Provide a general interpretation of the results in the context of other evidence, and implications for future research.                                                                                  | 21,22              |
| <b>FUNDING</b>                |    |                                                                                                                                                                                                          |                    |
| Funding                       | 27 | Describe sources of funding for the systematic review and other support (e.g., supply of data); role of funders for the systematic review.                                                               | 23                 |

From: Moher D, Liberati A, Tetzlaff J, Altman DG, The PRISMA Group (2009). Preferred Reporting Items for Systematic Reviews and Meta-Analyses: The PRISMA Statement. PLoS Med 6(7): e1000097. doi:10.1371/journal.pmed1000097

For more information, visit: [www.prisma-statement.org](http://www.prisma-statement.org).

Page 2 of 2

For peer review only - <http://bmjopen.bmj.com/site/about/guidelines.xhtml>

# BMJ Open

## Staff Experiences of Enhanced Recovery after Surgery – Systematic Review of Qualitative Studies

|                                 |                                                                                                                                                          |
|---------------------------------|----------------------------------------------------------------------------------------------------------------------------------------------------------|
| Journal:                        | <i>BMJ Open</i>                                                                                                                                          |
| Manuscript ID                   | bmjopen-2018-022259.R2                                                                                                                                   |
| Article Type:                   | Research                                                                                                                                                 |
| Date Submitted by the Author:   | 09-Oct-2018                                                                                                                                              |
| Complete List of Authors:       | Cohen, Rachel; University of Bristol, School of Population Health Sciences<br>Goberman-Hill, Rachael; University of Bristol, School of Clinical Sciences |
| <b>Primary Subject Heading</b>: | Health services research                                                                                                                                 |
| Secondary Subject Heading:      | Qualitative research                                                                                                                                     |
| Keywords:                       | Enhanced recovery, Qualitative, Joint replacement                                                                                                        |
|                                 |                                                                                                                                                          |

SCHOLARONE™  
Manuscripts

1  
2  
3 **Article Title: STAFF EXPERIENCES OF ENHANCED RECOVERY AFTER SURGERY – SYSTEMATIC**  
4 **REVIEW OF QUALITATIVE STUDIES**  
5  
6  
7

8 **Authors:** #Dr Rachel Cohen and Professor Rachael Goberman-Hill\*  
9  
10  
11

12  
13 **\*Corresponding author:** Dr Rachel Cohen, Centre for Academic Mental Health, Department  
14 of Population Health Sciences, Bristol Medical School, University of Bristol, Bristol, BS8 2BN, UK  
15  
16

17  
18 **Corresponding author's Email address:** rachel.cohen@bristol.ac.uk Tel: +44(0)117 331 4007  
19  
20

21 **#Co-author:** Professor Rachael Goberman-Hill, Professor of Health and Anthropology,  
22 Translational Health Sciences, Bristol Medical School, University of Bristol, Learning and Research  
23 Building, Level 1, Southmead Hospital, Bristol BS10 5NB, UK  
24  
25  
26  
27  
28  
29  
30  
31  
32  
33  
34

35 **Keywords:** Enhanced Recovery, qualitative, joint replacement  
36  
37  
38  
39  
40  
41  
42  
43  
44  
45  
46  
47  
48  
49  
50  
51  
52  
53  
54  
55  
56  
57  
58  
59  
60

**ABSTRACT**

**Title:** Staff Experiences of Enhanced Recovery after Surgery – Systematic Review of Qualitative Studies

**Objectives:** To conduct a systematic review of qualitative studies which explore health professionals' experiences of and perspectives on the enhanced recovery after surgery (ERAS) pathway.

**Design:** Systematic review of qualitative literature using a qualitative content analysis. Literature includes the experiences and views of a wide range of Multidisciplinary Team and Allied Health Professional staff, to incorporate a diverse range of clinical and professional perspectives.

**Data sources:** PsychINFO, Medline, Cinahl, and PubMed were searched in May 2017

**Eligibility criteria for selecting studies:** The searches included relevant qualitative studies across a range of healthcare contexts. We included studies published from 2000-2017, as an appropriate timeframe to capture evidence about ERAS after implementation in the late 1990s. Only studies published in the English language were included, and we included studies that explicitly stated that they used qualitative approaches

**Data extraction and synthesis:** Literature searches were conducted by the first author and checked by the second author: both contributed to the extraction and analysis of data. Studies identified as relevant were assessed for eligibility using the Critical Appraisal Skills Programme (CASP) guidance.

**Results:** Eight studies were included in the review, including studies in six countries and in four surgical specialties. Included studies focus on health professionals' experiences of ERAS before, during and after implementation in colorectal surgery, gastrointestinal surgery, abdominal hysterectomy, and orthopaedics. Five main themes emerged in the analysis: communication and collaboration, resistance to change, role and significance of protocol-based care, and knowledge and expectations. Professionals described the importance of effective multidisciplinary team collaboration and communication, providing thorough education to staff and patients, and appointing a dedicated champion as means to implement and integrate ERAS pathways successfully. Evidence based guidelines were thought to be useful for improvements to patient care by

1  
2  
3 standardising practices and reducing treatment variations, but were thought to be too open to  
4 interpretation at local levels. Setting and managing 'realistic' expectations of staff was seen as a  
5 priority. Staff attitudes towards ERAS tend to become more favourable over time, as practices  
6 become successfully 'normalised'. Strengths of the review are that it includes a wide range of  
7 different studies, a variety of clinical populations, diversity of methodological approaches and local  
8 contexts. Its limitation is the inclusion of a small number of studies, although these represent six  
9 countries and four surgical specialties, and so our findings are likely to be transferable.

10  
11  
12  
13  
14  
15  
16  
17  
18 **Conclusions:** Staff feel positive about the implementation of ERAS, but find the process is complex and  
19 challenging. Challenges can be addressed by ensuring that multidisciplinary teams understand ERAS  
20 principles and guidelines, and communicate well with one another and with patients. Provision of  
21 comprehensive, coherent and locally relevant information to health professionals is helpful.  
22 Identifying and recruiting local ERAS champions is likely to improve the implementation and delivery  
23 of ERAS pathways.  
24  
25  
26  
27  
28  
29  
30  
31  
32  
33

## 34 **ARTICLE SUMMARY**

### 35 **Strengths and limitations of this study**

- 36  
37  
38  
39  
40  
41  
42  
43  
44  
45  
46  
47  
48  
49  
50  
51  
52  
53  
54  
55  
56  
57  
58  
59  
60  
- There is a need to synthesise qualitative evidence about staff experiences of Enhanced Recovery After Surgery (ERAS) because these provide insight into implementation of ERAS
- The review includes studies with a diverse range of populations, contexts and methodological approaches
- The review includes a small number of studies, but includes studies from six countries in four surgical specialties and so the findings are likely to be transferable and of relevance to several contexts of ERAS implementation



## INTRODUCTION

Enhanced recovery after surgery (ERAS) programmes were introduced and began to be implemented in the late 1990s[1], as part of an initiative towards reducing variations in patient care and improving quality standards[2]. Building upon their Danish origins, ERAS programmes have been internationally adopted, and widely implemented for major elective surgical pathways in colorectal surgery, orthopaedics, gynaecology, cardiology and urology. Depending upon the kind of diagnostic and surgical care in question, ERAS programmes are sometimes referred to using different names, including 'fast-track surgery', 'rapid recovery', 'accelerated discharge' or 'early discharge'.

The aim of ERAS pathways is to reduce length of hospital stay and lessen readmissions, minimise surgical complications, decrease morbidity, and improve cost effectiveness. Best described as a complex intervention[3,4], ERAS seeks to improve patient experiences and outcomes by focusing on key aspects of the care pathway, pre-, peri- and post operatively, as a means of reducing physiological and psychological stress. This involves the provision of better education and information for patients prior to their operations, the use of minimally invasive surgical techniques and anaesthesia, optimal pain management and early post-operative mobilisation, as well as the preparation of a discharge plan[5].

Despite their protocol-based foundations, evidence from recent studies indicates that ERAS pathways are implemented variably across different hospital settings. More information is needed about what the core active ingredients of ERAS are. We also need to know more about how these ingredients exert their effect according to local circumstances, and about how they shape (and are shaped by) the context of their implementation[4,6]. Existing literature has drawn particular attention to the factors which help, and those which hinder, the successful implementation of ERAS, identifying important barriers and facilitators to the process. Barriers include resistance to change, inadequate funding, lack of support from management, high staff turnover, poor documentation,

1  
2  
3 and shortness of time, whilst facilitators included a dedicated enhanced recovery lead, effective  
4 multidisciplinary team working and ongoing education for staff and patients[7].  
5  
6  
7  
8  
9

10 Patient experiences of and satisfaction with ERAS pathways have been studied using both  
11 quantitative and qualitative approaches: the latter have been especially useful in improving  
12 understandings of patient experiences and perspectives e.g.[8,9,10,11,12,13]. Sibbern et al's[14]  
13 systematic review of studies of patients' experiences provides a comprehensive discussion of  
14 existing qualitative research on this specific topic. Health professionals' satisfaction with and  
15 perspectives on ERAS, meanwhile, have typically been explored using quantitative approaches.  
16  
17  
18  
19  
20  
21  
22

23 Information about the experiences of health professionals in delivery of ERAS is needed to inform  
24 implementation and healthcare policy and practice. Such experiences are best gathered in details  
25 through qualitative research.  
26  
27  
28  
29  
30  
31

32 This article describes a systematic review of qualitative studies of health professionals' experiences  
33 of ERAS pathways. The aim of the review was to synthesise evidence of the experience of health  
34 professionals who have been involved in implementing the ERAS programme, incorporating their  
35 experiences before, during and after the programme was implemented, and of its subsequent  
36 delivery. The review aims to identify overarching themes that provide opportunities for improving  
37 implementation and practice.  
38  
39  
40  
41  
42  
43  
44  
45  
46  
47

## 48 **METHODS**

### 49 **Patient and Public Involvement**

50 This paper is a systematic review of qualitative studies. No patients were involved in the review.  
51  
52  
53  
54  
55  
56  
57  
58  
59  
60

### Prospero registration

Our systematic review was registered on PROSPERO in 2017: the registration number is CRD42017059952. The review sought to describe the experiences and perspectives of healthcare professionals involved in delivering enhanced recovery pathways.

### Literature search

We used methods of systematic search and review and conducted a search of PsychINFO, Medline, Cinahl, and PubMed to identify relevant qualitative studies across a range of health care contexts. The searches were conducted by the first author and checked by the second author. The searches included studies published from 2000-2017, as an appropriate timeframe to capture evidence about ERAS after implementation in the late 1990s. Only studies published in the English language were included, and we included studies that explicitly stated that they used qualitative approaches. For all of the databases, the search terms used were:

ERAS OR enhanced recovery OR fast-track OR accelerated recovery OR rapid recovery  
OR early discharge OR patients discharge OR enhance\* recov\* after surg\*  
Staff perspective OR staff experience\* OR staff perception\* OR ward staff OR nurs\* OR  
professional\*  
Qualitative OR interview\* OR ethnograph\* OR observation

The reference lists of articles identified from the database search were also scrutinised for possible additional studies.

### Quality assessment

As shown in the PRISMA flowchart (supplementary file), the database searches yielded 1201 articles in total. In addition, through searching the reference lists of the included studies, we identified five

1  
2  
3 further records. Eleven studies met the inclusion criteria, and were assessed for eligibility using the  
4  
5 Critical Appraisal Skills Programme (CASP) guidance (Critical Skills Appraisal Programme 2017)[15].  
6  
7 The CASP checklist for qualitative research provides a means of identifying the strengths and  
8  
9 weaknesses of research articles, assessing their usefulness and validity, and their relevance for  
10  
11 inclusion in the review. The CASP qualitative checklist was designed as a pedagogic tool and  
12  
13 therefore as a means of assessing whether qualitative approaches are appropriate to a research  
14  
15 question, the value of results, and to provide the opportunity to assess quality in a qualitative,  
16  
17 expertise-based and discursive fashion. Therefore, we considered the eleven studies using the ten  
18  
19 CASP questions which are: aim, methodology, design, recruitment strategy, data collection,  
20  
21 relationship between researcher and participants, ethical issues, data analysis, findings and research  
22  
23 value - three studies were excluded, and the remaining eight were included. Two of the three that  
24  
25 were excluded at this stage were quantitative rather than qualitative, and one focused on  
26  
27 rehabilitation following hip and knee arthroplasty, but not specifically on ERAS. The two authors  
28  
29 independently conducted quality assessment and agreed that all eight articles addressed all ten  
30  
31 CASP criteria and were of sufficient rigour and relevance for inclusion in the review.  
32  
33  
34  
35  
36  
37  
38

### 39 **Data extraction**

40  
41 After completion of quality assessment we conducted a qualitative meta-synthesis of the eight  
42  
43 eligible articles. This comprised close reading and extraction of key findings using descriptive  
44  
45 qualitative design[16], and a qualitative content analysis[17,18]. For the analysis, we focused on the  
46  
47 manifest content of the articles, i.e. what the texts say[17]. This involved searching for the common  
48  
49 concepts and themes[18] addressed in the articles regarding health professionals' experiences of  
50  
51 and perspectives on ERAS. Supporting quotes were also gathered. This enabled us to develop  
52  
53 meaning units within the themes, with the meaning units extracted from the findings of the studies.  
54  
55 Meaning units refer to the main considerations in relation to each theme that were raised by staff  
56  
57 about their experiences of implementing and delivering ERAS programmes. These were then  
58  
59  
60

1  
2  
3 condensed into content related categories, which the authors discussed and agreed upon. Content  
4  
5 related categories refer to the suggested techniques for addressing and responding to these  
6  
7 considerations. We then synthesised the chosen categories into themes as shown in Table 1.  
8  
9  
10  
11  
12  
13  
14  
15  
16  
17  
18  
19  
20  
21  
22  
23  
24  
25  
26  
27  
28  
29  
30  
31  
32  
33  
34  
35  
36  
37  
38  
39  
40  
41  
42  
43  
44  
45  
46  
47  
48  
49  
50  
51  
52  
53  
54  
55  
56  
57  
58  
59  
60

For peer review only

**TABLE 1**

| <b>Theme</b>                                 | <b>Meaning Unit</b>                                                                                                                                                                                                                                                                                                                                                                                                                                                                                                                         | <b>Content related category</b>                                                                                                                                                                                                                                                                                                                                                                                                                                                                                                                                        |
|----------------------------------------------|---------------------------------------------------------------------------------------------------------------------------------------------------------------------------------------------------------------------------------------------------------------------------------------------------------------------------------------------------------------------------------------------------------------------------------------------------------------------------------------------------------------------------------------------|------------------------------------------------------------------------------------------------------------------------------------------------------------------------------------------------------------------------------------------------------------------------------------------------------------------------------------------------------------------------------------------------------------------------------------------------------------------------------------------------------------------------------------------------------------------------|
| Collaboration and communication              | <ul style="list-style-type: none"> <li>Staff find the information-rich nature of ERAS confusing. Many staff feel that they do not understand it well enough and/or that they have not received sufficiently clear or consistent information or training</li> <li>Information about ERAS is not always disseminated between staff – and between staff and patients – in a coherent and consistent way.</li> <li>Collaborative MDT work is hindered by high staff turnover and a lack of coordination across different departments</li> </ul> | <ul style="list-style-type: none"> <li>Providing staff and their patients with a comprehensive education about and introduction to ERAS improves understanding and helps to mitigate confusion</li> <li>Strong team communications help to ensure the effective dissemination of information</li> <li>Building good relationships within the MDT helps to encourage dialogue between staff, and to improve their willingness and ability to collaborate. The appointment of a dedicated ERAS ‘champion’ improves staff engagement and collaborative working</li> </ul> |
| Resistance to change                         | <ul style="list-style-type: none"> <li>Staff are reluctant to implement or engage with new and unfamiliar working practices. Some staff – especially those who are older, or more well established in their role – tend to dislike change more generally and are disinclined to engage with ERAS.</li> </ul>                                                                                                                                                                                                                                | <ul style="list-style-type: none"> <li>Appointing an ERAS champion helps to encourage more positive attitudes amongst staff</li> </ul>                                                                                                                                                                                                                                                                                                                                                                                                                                 |
| Role and significance of protocol based care | <ul style="list-style-type: none"> <li>Staff recognise the usefulness of evidence-based protocol guidelines as a means of reducing variations and standardising practice, but have mixed feelings about whether ERAS facilitates this well.</li> <li>ERAS is not definitively prescriptive, and therefore allows for too much variability in local implementation.</li> </ul>                                                                                                                                                               | <ul style="list-style-type: none"> <li>The incorporation of standardised order sets and basing ERAS practices on best evidence increases staff willingness to implement it as a complex intervention</li> <li>Having a local ERAS champion helps to improve consistency in implementing and operationalising the pathway into existing systems at local sites</li> </ul>                                                                                                                                                                                               |

|                                                                                                 |                                                                                                                                                                                                                                                                                                                                                                                                                                                                                                                                                                                                                         |                                                                                                                                                                                                                                                                                                                                                                                                                                                    |
|-------------------------------------------------------------------------------------------------|-------------------------------------------------------------------------------------------------------------------------------------------------------------------------------------------------------------------------------------------------------------------------------------------------------------------------------------------------------------------------------------------------------------------------------------------------------------------------------------------------------------------------------------------------------------------------------------------------------------------------|----------------------------------------------------------------------------------------------------------------------------------------------------------------------------------------------------------------------------------------------------------------------------------------------------------------------------------------------------------------------------------------------------------------------------------------------------|
|                                                                                                 | <ul style="list-style-type: none"> <li>Some staff feel conflicted about having to compromise their capacity for and confidence in providing individualised care for patients.</li> </ul>                                                                                                                                                                                                                                                                                                                                                                                                                                | <ul style="list-style-type: none"> <li>Clearer guidance about when it is acceptable to deviate from ERAS protocols would improve staff confidence.</li> </ul>                                                                                                                                                                                                                                                                                      |
| <p style="writing-mode: vertical-rl; transform: rotate(180deg);">Knowledge and expectations</p> | <ul style="list-style-type: none"> <li>Staff feel that they need a broader knowledge and understanding of ERAS, i.e. beyond protocol guidelines.</li> <li>Staff are sceptical about the usefulness and value of ERAS prior to its implementation.</li> <li>Managing the expectations of staff and patients is recognised as being crucial to the successful implementation of ERAS. Differing professional perspectives, which are sometimes based on incorrect assumptions, can create ambivalence and uncertainty amongst staff. Staff use tacit knowledge and a “common sense” approach to overcome this.</li> </ul> | <ul style="list-style-type: none"> <li>Belief in the value and potential positive impact of ERAS improves the willingness of staff to engage with the pathway and its guidelines.</li> <li>Staff feel more positive about and favourable towards ERAS when they have seen it work successfully in practice.</li> <li>Setting clear and realistic expectations about ERAS helps to improve staff and patient experiences of the pathway.</li> </ul> |

1  
2  
3  
4  
5  
6  
7  
8  
9  
10  
11  
12  
13  
14  
15  
16  
17  
18  
19  
20  
21  
22  
23  
24  
25  
26  
27  
28  
29  
30  
31  
32  
33  
34  
35  
36  
37  
38  
39  
40  
41  
42  
43  
44  
45  
46  
47  
48  
49  
50  
51  
52  
53  
54  
55  
56  
57  
58  
59  
60

For peer review only



1  
2  
3  
4  
5 **RESULTS**  
6  
7  
8  
9

10 The eight studies included were conducted in the UK (n = 1), US (n = 1), Canada (n = 2), Denmark (n = 2), Norway (n=1) and Australia (n = 1) (Table 2).  
11  
12  
13  
14  
15  
16  
17

18 **TABLE 2**  
19

| Study         | Study design                                                                              | Surgical population    | Methodology and methods                                              | Number and type of participants                             | Country | Key findings                                                                                                                                                                                                                 |
|---------------|-------------------------------------------------------------------------------------------|------------------------|----------------------------------------------------------------------|-------------------------------------------------------------|---------|------------------------------------------------------------------------------------------------------------------------------------------------------------------------------------------------------------------------------|
| Alawadi et al | Qualitative study to assess the perceived barriers and facilitators before ERAS adoption. | Colorectal surgery     | Qualitative interviews with MDT staff and patients. Content analysis | 8 anaesthesiologists, 5 surgeons, 6 nurses, and 18 patients | US      | Conclusion: 'Although limited hospital resources are perceived as a barrier to ERAS implementation... there is strong support for such pathways and multiple factors were identified that may facilitate change' (2016: 700) |
| Sjetne et al  | Pre-postintervention prospective design, to monitor changes in                            | Gynaecological surgery | Questionnaires and qualitative interviews.                           | 34, 33 and 32 nurses returned questionnaires in             | Norway  | Conclusion: 'expected clinical gains achieved by                                                                                                                                                                             |

20  
21  
22  
23  
24  
25  
26  
27  
28  
29  
30  
31  
32  
33  
34  
35  
36  
37  
38  
39  
40  
41  
42  
43  
44  
45  
46

|                |                                                                                                                                                   |                        |                                                                                                                                |                                                                                                                                 |         |                                                                                                                                                                                 |
|----------------|---------------------------------------------------------------------------------------------------------------------------------------------------|------------------------|--------------------------------------------------------------------------------------------------------------------------------|---------------------------------------------------------------------------------------------------------------------------------|---------|---------------------------------------------------------------------------------------------------------------------------------------------------------------------------------|
|                | workload and work environment of ward nursing staff when ERAS was introduced                                                                      |                        | Quantitative data analysed using SAS (t tests and differences in means), qualitative data used to elaborate the topics studied | phases 1,2, and 3 respectively (100% survey response rate)<br>9 interviews with 4 different nurses                              |         | introducing ERAS are achieved without compromising the work environment of ward nurses' (2009: 239)                                                                             |
| Pearsall et al | Qualitative study to understand barriers and enablers in perioperative implementation of ERAS                                                     | Colorectal surgery     | Qualitative semi structured interviews. Thematic analysis                                                                      | 19 general surgeons, 18 anaesthesiologists, 18 nurses                                                                           | Canada  | Conclusion: 'participants supported the need for implementation of an ERAS program... [but] felt there remained major barriers to [its] successful implementation' (2015: 96)   |
| Wagner et al   | Exploratory and descriptive qualitative study to gather knowledge about staff and patient experiences of the Accelerated Recovery Programme (ARP) | Abdominal hysterectomy | Qualitative individual interviews and focus groups with staff, observation of and interviews with patients. Thematic analysis. | Observation of 17 patients, 10 of whom were interviewed twice<br>Interviews with 15 staff, who all participated in focus groups | Denmark | Conclusion: patients underwent ARP without significant problems, but identified a need for greater psychological support. Staff data showed a positive change in opinion and an |

|                   |                                                                                                                                 |                          |                                                                                                         |                                                                           |        |                                                                                                                                                                                                                |
|-------------------|---------------------------------------------------------------------------------------------------------------------------------|--------------------------|---------------------------------------------------------------------------------------------------------|---------------------------------------------------------------------------|--------|----------------------------------------------------------------------------------------------------------------------------------------------------------------------------------------------------------------|
|                   |                                                                                                                                 |                          |                                                                                                         |                                                                           |        | understanding of ARP.<br>Recommendations made for better information to be provided to staff and patients, in consultation rooms and outpatient clinics                                                        |
| Jeff et al        | To explore and describe ward nurses' experience of ERAS in the postoperative phase                                              | Gastrointestinal surgery | Semi structured interviews and documentary evidence (memos and reflective journals). Thematic analysis. | Interviews with 8 (of a possible 30) nurses                               | UK     | Conclusion: 'the central difficulty experienced by nurses was trying to adapt the protocol to the demands of patient care delivery within the constraints of their role and organisational culture' (2014: 31) |
| Gotlib Conn et al | Process evaluation of ERAS champions' experiences. To understand enablers and barriers to the successful implementation of ERAS | Colorectal surgery       | Qualitative semi structured interviews. Normalisation Process Theory framework analysis.                | 5 surgeons, 14 anaesthesiologists, 15 nurses, and 14 project coordinators | Canada | Conclusion: successful implementation of ERAS is achieved by a 'complex series of cognitive and social processes... [the study                                                                                 |

1  
2  
3  
4  
5  
6  
7  
8  
9  
10  
11  
12  
13  
14  
15  
16  
17  
18  
19  
20  
21  
22  
23  
24  
25  
26  
27  
28  
29  
30  
31  
32  
33  
34  
35  
36  
37  
38  
39  
40  
41  
42  
43  
44  
45  
46

|            |                                                                                                |                    |                                                                   |                              |           |                                                                                                                                                                                                                                                                                                                                   |
|------------|------------------------------------------------------------------------------------------------|--------------------|-------------------------------------------------------------------|------------------------------|-----------|-----------------------------------------------------------------------------------------------------------------------------------------------------------------------------------------------------------------------------------------------------------------------------------------------------------------------------------|
|            |                                                                                                |                    |                                                                   |                              |           | demonstrates the importance of] champion coherence, external and internal relationship building, and the strategic management of a project’s organisation-level visibility’ (2015: 1)                                                                                                                                             |
| Lyon et al | Qualitative study to assess barriers to ERAS implementation, conducted at post-operative stage | Colorectal surgery | Qualitative semi-structured interviews. Grounded theory analysis. | 18 interviews with MDT staff | Australia | Conclusion: there are four key areas that present barriers to successful ERAS implementation: (i) patient-related factors, (ii) staff-related factors, (iii) practice-related issues and (iv) resources. For ERAS to be implemented successfully and function efficiently with high levels of compliance, these key areas need to |

|                  |                                                                                                                                                                               |                                                |                                                                  |                                       |         |                                                                                                                                                                                      |
|------------------|-------------------------------------------------------------------------------------------------------------------------------------------------------------------------------|------------------------------------------------|------------------------------------------------------------------|---------------------------------------|---------|--------------------------------------------------------------------------------------------------------------------------------------------------------------------------------------|
|                  |                                                                                                                                                                               |                                                |                                                                  |                                       |         | be addressed (ideally) before launching an ERAS programme, and then carefully managed throughout                                                                                     |
| Berthelsen et al | Qualitative study to illuminate orthopaedic nurses' perceptions and experiences of providing individual nursing care for older patients in standardised fast-track programmes | Orthopaedic surgery (hip and knee replacement) | Semi-structured interviews. Manifest and latent content analysis | 10 interviews with orthopaedic nurses | Denmark | Conclusion: nurses felt they had to compromise their nursing care and ethics in order to comply with the fast-track programme and implement the standardised care that it recommends |

1  
2  
3 The sample sizes ranged from 8 to 63. The studies focus on the implementation and delivery of ERAS  
4 across a variety of clinical contexts: four on colorectal surgery[19,20,21,22], one on gastrointestinal  
5 surgery[23], one on abdominal hysterectomy[24], and two on orthopaedics[25]. Participants  
6 included in the studies were a wide range of Multidisciplinary Team and Allied Health Professional  
7 staff, and therefore incorporate a diverse range of clinical and professional perspectives. These  
8 include registrars, consultants, surgeons, anaesthetists, doctors, nurses and physiotherapists, as well  
9 as nursing managers, ERAS coordinators, care coordinators and service improvement  
10 coordinators[21]. Participants in one study were recruited specifically because of their role as local  
11 ERAS champions[20]. Individual semi-structured interviews were used for data collection in all eight  
12 studies. Two studies conducted focus groups as well as interviews[24], and one also collected and  
13 analysed memos and reflective journals completed by participants[23]. The different methodologies  
14 used in the included studies emphasise the usefulness of this review in drawing together a range of  
15 perspectives on staff experiences of implementing ERAS programmes.

16  
17  
18  
19  
20  
21  
22  
23  
24  
25  
26  
27  
28  
29  
30  
31  
32 The included studies incorporated data gathered at various stages of ERAS implementation: before,  
33 during and after. Studies 20, 22 and 26 include information about staff experiences of ERAS pre-  
34 implementation and identify their areas of concern about potential barriers (e.g. limited local  
35 resources and resistance to change) prior to the introduction of the programmes. These studies,  
36 along with study 19, also incorporate data from the peri- and post-implementation stages of ERAS.  
37 They show that, despite the presence of such barriers, ERAS programmes were perceived as having  
38 brought about changes for the better, even where this process had been challenging. Studies 21 and  
39 23 focus on the post-implementation stage of ERAS, and reflect on the various challenges described  
40 by staff, making suggestions for possible improvements. Gotlib Conn et al [20] provide a unique  
41 perspective, given that the implementation of ERAS constitutes part of the study, thereby  
42 encompassing the experiences of staff champions throughout the entire implementation process. It  
43 therefore explores the success and sustainability of ERAS in both the shorter and longer term from  
44 the champions' perspective. Despite their different contexts, stages of ERAS implementation and  
45  
46  
47  
48  
49  
50  
51  
52  
53  
54  
55  
56  
57  
58  
59  
60

1  
2  
3 surgical populations, the findings from the included studies were largely consistent with one  
4  
5 another.  
6  
7  
8  
9

10 Analysis yielded four themes which are shown in Table 1: communication and collaboration,  
11  
12 resistance to change, role and significance of protocol-based care, and knowledge and expectations.  
13  
14 The themes identify the key elements of health professionals' experiences of and perspectives on  
15  
16 participation in an ERAS pathway. Each theme is described in turn.  
17  
18  
19  
20

### 21 **Theme 1: Communication and collaboration**

22  
23 Findings from all of the studies emphasised that the successful integration of ERAS practices  
24  
25 depends upon effective multidisciplinary team (MDT) communication, and a shared willingness to  
26  
27 collaborate. Where this worked well, comprehensive education for staff and patients about ERAS, as  
28  
29 well as clear and effective dissemination of knowledge and information were felt to be contributing  
30  
31 factors. The high turnover of MDT staff was cited as presenting a challenge to this process, and it  
32  
33 was suggested that providing a 'thorough introduction'[24] about ERAS principles to new staff  
34  
35 helped to improve matters. Good team work was also seen to be crucial[22], since this helped to  
36  
37 foster an environment in which discipline or intervention specific concerns[19], and issues relating to  
38  
39 staff and practice[21] could be addressed. Strong team communication was also seen as a means of  
40  
41 mitigating staff confusion about ERAS[21]: specific areas identified as requiring improvement were  
42  
43 communications between nurses and surgeons[19], dialogue between staff and patients, in which  
44  
45 the compressed and information-filled approach of ERAS can prove especially challenging[24].  
46  
47 Having a small clinical community and a close-knit team was recognised as creating a good basis for  
48  
49 effective organisational interactions[22].  
50  
51  
52  
53  
54  
55

56  
57 Staff also drew attention to the challenges of coordinating the various aspects of the ERAS  
58  
59 programme, and maintaining a good collaborative approach to this within the MDT[23]: indeed,  
60

1  
2  
3 there were concerns that a lack of coordination across different clinical departments served to  
4  
5 jeopardise ongoing consistency of practice[22], and it was felt that the provision of feedback and  
6  
7 audits to hospital stakeholders[20] was a valuable communicative resource in this respect.  
8  
9  
10 For staff working as champions, building good relationships in and across participating ERAS centres  
11  
12 was essential for the successful integration of the programme. They recognised that such  
13  
14 relationships served to encourage communication about - and, thereby, establish better shared  
15  
16 understandings of current practices on the ground[20], and raise awareness about ERAS  
17  
18 guidelines[22] by making sure that everyone is onboard. It was felt that ERAS programmes were  
19  
20 most effectively introduced using a bottom up, as opposed to a top down approach[20]. Champions  
21  
22 indicated that staff were more likely to engage positively with the integration of ERAS practices  
23  
24 where they are able to be involved in co-creating them from the ground up, since this collaborative  
25  
26 endeavour helped to foster a collective sense of responsibility[20].  
27  
28  
29  
30  
31

## 32 **Theme 2: Resistance to change**

33  
34 Data from the studies included in this review highlighted how *resistance to change* amongst staff  
35  
36 had presented a major challenge to the implementation of ERAS at both collective and individual  
37  
38 levels. It was noted, for instance, that introducing and implementing the programme requires a  
39  
40 culture change[19,20] for staff, which they expect to find big and dramatic[23]. Concerns about the  
41  
42 unfamiliarity of new working practices can lead to negative attitudes and a reluctance to engage  
43  
44 with ERAS guidelines[23], whilst a fundamental dislike of change more widely also provokes  
45  
46 disinclination[19,22]. The scope and intensity of the resistance described here is also motivated by  
47  
48 staff age and experience[21]. Newer nurses, for instance, found it easier to adjust to the programme  
49  
50 and tended to do so more quickly than those who were seen to be stuck in old ways[23].  
51  
52  
53  
54  
55

56  
57 Appointing a “champion” was recognised as having been extremely helpful in terms of encouraging  
58  
59 positive attitudes and effective collaboration when implementing ERAS programmes[19,20,26]. Staff  
60



1  
2  
3 taking up this, or a similar, role were appointed from a range of MDT disciplines, and included a  
4  
5 ward based designated ERAS nurse[23] and an ERAS coordinator[21]. From the perspective of the  
6  
7 champions themselves, meanwhile, resistance was conceptualised less broadly and in more precise  
8  
9 terms: attributing this, for instance, to a lack of agreement about specific interventions rather than  
10  
11 wider processes[20]. They also felt that even where MDTs were, on the whole, easily accepting of  
12  
13 ERAS guidelines, there could still be individual level resistance[20] from some staff.  
14  
15  
16  
17  
18

### 19 **Theme 3: Role and significance of protocol based care**

20  
21 Staff recognised that working to evidence based guidelines and related protocols can in principle be  
22  
23 helpful, because doing so “provides a framework to optimise patient flow by examining what should  
24  
25 be done, when, and by whom, thereby reducing delays for patients”[23: p.30] standardising  
26  
27 practices, reducing variations in treatment, and thereby ostensibly improving the quality of patient  
28  
29 care. In practice, however, there were mixed feelings amongst MDT staff as to whether or not this  
30  
31 was the case in relation to delivering ERAS interventions. Surgeons felt that these were easily  
32  
33 implementable as long as they were based on best evidence and incorporated in standardised order  
34  
35 sets[19], whilst anaesthesiologists acknowledged that although they were not currently following a  
36  
37 standardised protocol, they were open to the idea of implementing standardised guidelines[19].  
38  
39 There was also agreement amongst MDT staff that the implementation of the ERAS programme  
40  
41 would provide consistency across working practices[22].  
42  
43  
44  
45  
46  
47

48 The studies highlighted several challenges of “fittingness” in relation to ERAS programmes,  
49  
50 emphasising the relevance of institutional, organisational and patient factors. Champions noted that  
51  
52 ERAS pathways are not definitively prescriptive, and that this leads to variability in how they  
53  
54 ultimately become integrated into and operationalised within a site’s existing clinical systems[20].  
55  
56 One study found that needing to modify or deviate from ERAS protocols could create confusion for  
57  
58 staff[21]. Difficulties in fitting high numbers of patients into the timescales recommended for length  
59  
60

1  
2  
3 of hospital stay under ERAS were also cited as a challenge. Nursing staff seemed to experience the  
4  
5 greatest impact of these particular challenges on their day to day work, in which they were faced  
6  
7 with the reality that some patients do not and cannot comply with ERAS requirements and do not  
8  
9 “fit” standard care trajectories, because they are too frail and old, or have very high levels of  
10  
11 comorbidity, and are simply too unwell[21,25]. Such issues presented ethical as well as logistical  
12  
13 difficulties for nursing staff. Some described feeling highly conflicted about the tensions they  
14  
15 experienced in striving to achieve the standardised care targets of ERAS protocols whilst also  
16  
17 upholding their ideals of nursing practice[25]. They felt that they were having to make compromises  
18  
19 in their work, and experienced this as a struggle. Particular concerns were raised about the  
20  
21 detrimental impact that this was having upon nurses’ capacity for providing adequately  
22  
23 individualised care for patients[25], and the notion of having one protocol for all[23] was felt to be  
24  
25 unsatisfactory. Nursing staff felt that the absence of clear guidance about when and how to default  
26  
27 or deviate from ERAS protocols led them to be overly cautious in their work, and they indicated that  
28  
29 better defined and more precise inclusion criteria about which patients to drive through recovery  
30  
31 would be helpful[23].  
32  
33  
34  
35  
36  
37  
38

#### 39 **Theme 4: Knowledge and expectations**

40  
41 Staff recognised that a good knowledge and understanding of ERAS is crucial if it is to be successfully  
42  
43 implemented, although the scope of this requirement transcends the procedural details and  
44  
45 pragmatic instructions provided by ERAS protocols themselves. Rather, it was important for staff to  
46  
47 have a good grasp of its wider aims and objectives[23], and to believe in the value and (potentially)  
48  
49 positive impact of the intervention[20,23]. Three of the studies found that, on the whole, staff did  
50  
51 feel positive about and favourable towards the implementation of ERAS[19,20,22], and one study  
52  
53 showed that although staff were sceptical about it prior to implementation, they felt more positive  
54  
55 having seen how well ERAS worked in practice[24]. In all the studies, however, staff acknowledged  
56  
57 that considerable challenges still exist and that these will need to be overcome. The nature of such  
58  
59  
60

1  
2  
3 concerns varied for staff, depending upon their own MDT specialty, since this had impact upon the  
4 way in which they engaged with ERAS practices in their everyday work. Nurses, in particular,  
5 described feeling cautious and sceptical about implementing ERAS because of a lack of confidence,  
6  
7  
8  
9  
10  
11  
12  
13  
14  
15  
16  
17  
18  
19  
20  
21  
22  
23  
24  
25  
26  
27  
28  
29  
30  
31  
32  
33  
34  
35  
36  
37  
38  
39  
40  
41  
42  
43  
44  
45  
46  
47  
48  
49  
50  
51  
52  
53  
54  
55  
56  
57  
58  
59  
60

concerns varied for staff, depending upon their own MDT specialty, since this had impact upon the way in which they engaged with ERAS practices in their everyday work. Nurses, in particular, described feeling cautious and sceptical about implementing ERAS because of a lack of confidence, indecision, and anxieties about being challenged by other members of the MDT during ward rounds. They were also worried about any potentially adverse consequences for patients of progressing their recovery in accordance with ERAS[23]. Tacit knowledge was also understood to be important for nurses for their role in implementing ERAS: this helped them to take a common sense[23] approach to the process, especially in terms of knowing when it was appropriate to deviate from ERAS guidelines[23,25].

Setting and effectively managing expectations was a key concern for health professionals in helping them to build shared understandings around ERAS, and to understand their own individual tasks and responsibilities. The expectations of both professionals and patients (and negotiations of the two) were relevant here. Staff felt that they themselves benefitted from setting clear patient expectations[19], and were also keenly aware of some of the complex difficulties in collective understandings of what was expected from whom, when, and in which ways across the MDT, where various parties "made an effort to fulfil the other's expectations in the situation, but from different perspectives and different understandings of the same situation"[24: p.420].

Pearsall et al.[19] note that staff expectations - of self and others - differ across the MDT and, importantly, explore how these are linked to (sometimes incorrect) assumptions made by some staff about the knowledge and expectations of their colleagues, creating uncertainty and ambivalence around ERAS implementation. For instance, where nurses anticipated that some surgeons might resist ERAS recommendations, surgeons thought that nursing culture and lack of nursing time would present a problem. Anaesthetists, meanwhile, were concerned that patients would not understand ERAS guidelines and procedures, and assumed that it would be very difficult to amend existing and

1  
2  
3 well-established nursing culture and surgeon behaviours. The surgeons themselves were  
4  
5 unconvinced as to whether changes made in accordance with ERAS would make any difference to  
6  
7 patients' experiences of the surgical pathway.  
8  
9

10  
11  
12 Staff acknowledged that their expectations about ERAS timeframes should be realistic[23], that is,  
13  
14 accepting of the reality that some patients would be unable to achieve recovery according to the  
15  
16 goals prescribed in the protocol. Whilst some nurses conceptualised such non-achievement as a  
17  
18 failure of the [ERAS] programme[23], however, others saw the patients themselves as being  
19  
20 responsible for this, on account of them being unprepared for a short hospital stay or early  
21  
22 mobilisation, and feeling disproportionately anxious about the process[25]. Staff recognised the  
23  
24 extent to which good pre-operative education is helpful for patients, but noted that they  
25  
26 nevertheless have to deal with problems arising where patients have unrealistic expectations, forget  
27  
28 important information, or simply will not comply with ERAS instructions[21]. It was also felt that  
29  
30 some patients might be unable to understand the information and instructions that they received,  
31  
32 creating difficulties for MDT staff[22].  
33  
34  
35  
36  
37  
38  
39  
40  
41  
42

## 43 **DISCUSSION**

44  
45  
46  
47  
48 Our meta-synthesis of qualitative studies produced four themes, which reflect key considerations  
49  
50 described by health professionals in relation to their experiences of delivering ERAS pathways. These  
51  
52 themes were communication and collaboration, resistance to change, role and significance of  
53  
54 protocol-based care and knowledge and expectations. Staff emphasised that there must be effective  
55  
56 MDT collaboration and communication, if ERAS practices are to be successfully implemented and  
57  
58 integrated. This included providing a thorough education to staff and patients about ERAS, and  
59  
60

1  
2  
3 ensuring that information and knowledge about it was clearly and consistently disseminated across  
4  
5 the MDT. The coordination of ERAS approaches was acknowledged to be challenging, and the  
6  
7 appointment of a designated ERAS champion was experienced as being helpful in this respect.  
8  
9

10  
11  
12 The value of evidence based guidelines was described as useful means of helping to improve patient  
13  
14 care by bringing about a standardisation of practices and a reduction in variations in treatment, but  
15  
16 staff were ambivalent about the extent to which ERAS created such consistencies in practice.

17  
18 Concerns were raised about the necessity of modifying or deviating from ERAS guidelines, where  
19  
20 these did not “fit” with local site systems or with the care requirements of individual patients. A  
21  
22 need for more precise information about how best to do this was identified.  
23  
24  
25

26  
27  
28 A comprehensive knowledge and understanding of ERAS was cited as being essential to its successful  
29  
30 implementation: in terms of both procedural detail and the broader aims and objectives that  
31  
32 underpin the intervention itself. Staff were concerned about the impact of ERAS upon their own  
33  
34 everyday working practices, and in relation to their own speciality within the MDT. Staff  
35  
36 expectations about ERAS varied across MDT disciplines, and the need to set and manage these  
37  
38 effectively was prioritised. The importance of establishing ‘realistic’ expectations was emphasised  
39  
40 for staff and also the patients for whom they care. This is a key finding that underpins the need for  
41  
42 clear guidance to staff who are delivering ERAS.  
43  
44  
45

46  
47  
48 The implementation and embedding of ERAS was understood to require complex processes of  
49  
50 adjustment, acceptance and engagement for staff, constituting a process that evolves gradually over  
51  
52 time. Staff attitudes towards ERAS were also subject to temporal change, and tended to become  
53  
54 increasingly favourable via reflections upon how well the new and or amended practices were  
55  
56 working, and the ways in which they became ‘normalised’.  
57  
58  
59  
60

1  
2  
3 Given that ERAS seeks to improve patients' outcomes through consistency in care, findings from our  
4 review highlight that, whilst health professionals are confident that ERAS pathways have the  
5 potential to achieve this, some key improvements are needed. The findings of this review are new  
6 because they highlight key and common themes that appear in all delivery of ERAS in diverse  
7 contexts. They also build upon existing knowledge about ERAS by showing that the pathway is  
8 implemented disparately across different settings, according to local contexts and circumstances[4],  
9 and that the provision of better information and education to staff and patients can achieve better  
10 consistency. Our review also indicates that health professionals cite resistance to change amongst  
11 staff as a hindrance to the effective implementation of ERAS[6], Our findings demonstrate that  
12 effective collaboration and communication amongst staff – and between staff and patients – helps  
13 to improve the effectiveness of ERAS[5] and, again, good clear guidance could help with this. The  
14 most important finding from the included studies is that appointing a dedicated Enhanced Recovery  
15 “champion” is helpful in mitigating many of the barriers to the effective implementation of ERAS [7].  
16 Existing literature finds that champions are central to the successful implementation of complex  
17 interventions and practice changes in healthcare settings [27] and that they play a key role in quality  
18 improvement when new programmes are introduced [28, 29]. The studies included in our review  
19 indicate that the presence of an ERAS champion improves MDT communication and collaboration,  
20 assists the provision of consistent information and education to staff and patients, and helps to  
21 alleviate resistance to change and lack of confidence amongst staff when they are faced with new  
22 working practices brought about by ERAS protocols. Their enthusiastic promotion of new working  
23 practices improves staff confidence and skills at a local level, thereby helping to overcome resistance  
24 to change [30]. This is the key implication of this review, and an important message for future  
25 practice.

26  
27  
28 We conducted the systematic review in a manner that was designed to capture as many studies as  
29 possible by using keywords that were identified and refined from existing literature. To enhance  
30

1  
2  
3 rigour in study selection the included studies were all appraised by the two authors. This process  
4 acted as a screening process that allowed us to exclude three studies and retain eight as well as  
5  
6 appraise whether the included studies sufficiently addressed the ten questions from the CASP  
7  
8 qualitative checklist. Assessment using the CASP checklist can be conducted in a variety of ways and  
9  
10 our process enabled us to define all studies to be of sufficient quality. To improve reporting quality  
11  
12 of this review, we have adhered to the ENTREQ guidance on the reporting of qualitative  
13  
14 syntheses[31]. The reflexive approach of the authors in the selection process sought to minimise  
15  
16 researcher bias.  
17  
18  
19  
20  
21  
22

23 One of the strengths of this review is that it includes a range of different studies, and therefore  
24 incorporates a variety of populations and geographical contexts. Further strengths are the diversity  
25  
26 of methodological approaches used in the studies, and the different clinical contexts and local  
27  
28 environments of the included studies. This provides a richness of perspectives. This paper therefore  
29  
30 makes a valuable contribution to the field of literature. A limitation of this review is the small  
31  
32 number of included studies, however, we included studies in six countries across four surgical  
33  
34 specialities and as such our work highlights key issues that are transferable between contexts. There  
35  
36 are no ethnographic studies included in our review, and we suggest that future research could build  
37  
38 upon existing knowledge of and understanding about staff perspectives of ERAS by taking an  
39  
40 ethnographic approach. The value of using qualitative ethnographic study in healthcare settings is  
41  
42 well documented [32,33,34]. The findings from this review indicate that an ethnographic approach  
43  
44 would enable a more nuanced understanding of the ways in which care pathways are organised,  
45  
46 explained, understood, performed and delivered across different hospital contexts and settings, and  
47  
48 to contrast and compare elements of care and practice. We also note that ERAS pathways are now  
49  
50 being implemented in elective orthopaedic surgery, and suggest that this is a valuable area for  
51  
52 future study.  
53  
54  
55  
56  
57  
58  
59  
60

## CONCLUSION

We reviewed and synthesised qualitative studies that explore health professionals' experiences of and perspectives on the enhanced recovery after surgery (ERAS) pathway. This is the first systematic review to draw together findings from qualitative studies with health professionals, and to inform implementation of ERAS we would argue that their experiences and views are crucial. Findings from our review indicate that, whilst staff generally feel positive about the implementation of ERAS, they acknowledge that the process is complex and challenging. Many of the challenges identified, such as resistance to change and lack of confidence can however be mitigated by ensuring that MDTs understand ERAS principles and guidelines, and that they communicate well with one another and with patients. Other challenges, such as a lack of local resources and high rates of comorbidity amongst patients are perhaps more challenging to address. We suggest that the provision of comprehensive, coherent and locally relevant information to health professionals would help to improve the implementation and delivery of ERAS pathways. Identifying and recruiting an ERAS champion is also recommended as means of improving the effectiveness of the pathway.

## A: CONTRIBUTORSHIP STATEMENT

The authors of this article are Dr Rachel Cohen (RC) and Professor Rachael Goberman-Hill (RGH). Both authors made substantial contributions to the conception and the design of the systematic review. Literature searches were conducted by RC, and RGH carried out the CASP screening. Both RC and RGH contributed to the extraction, analysis and interpretation of data from the papers included in the review. RC and RGH worked on drafts of the review, made revisions and agreed on a final version for publication. Both RC and RGH agree to be accountable for all aspects of the work in ensuring that questions related to the accuracy or integrity of any part of the work are appropriately investigated and resolved.



**B: COMPETING INTERESTS**

The author and co-author have no competing interests to declare

**C: FUNDING**

This review forms part of the dissemination strategy for the Atlas (Ethnographic study of care pathways for hip and knee replacement) project, which is funded by the National Institute for Health Research Health Services and Delivery Research Programme (project number 14/46/02).

**D: DATA SHARING STATEMENT**

Data for the study may be made available from University of Bristol's research data repository under a controlled access arrangement. Requests for access will be referred to the University's data access committee before data can be shared under a data sharing agreement. As such, anonymous data from the study may be seen and used by other researchers, for ethically approved research projects, on the understanding that confidentiality will be maintained. Release of the data will be at the discretion of the data access committee (data custodian).

**E: ACKNOWLEDGEMENT**

Support for the study was received from the Oxford NIHR Biomedical Research Centre, Nuffield Orthopaedic Centre, University of Oxford. The views and opinions expressed therein are those of the authors and do not necessarily reflect those of the HS&DR Programme, NIHR, NHS or the Department of Health. We thank the wider team for the study, including Professor Andrew Judge as Principal Investigator. We also thank Christine Hobson for her work in support of our research.

1  
2  
3  
4  
5  
6  
7  
8  
9  
10  
11  
12  
13  
14  
15  
16  
17  
18  
19  
20  
21  
22  
23  
24  
25  
26  
27  
28  
29  
30  
31  
32  
33  
34  
35  
36  
37  
38  
39  
40  
41  
42  
43  
44  
45  
46  
47  
48  
49  
50  
51  
52  
53  
54  
55  
56  
57  
58  
59  
60

## REFERENCES

1. Kehlet H. Fast-track colorectal surgery. *The Lancet* 2008;371:791-3.
2. Department of Health. Enhanced Recovery Partnership Programme Project Report. March 2011. Available from: <https://www.gov.uk/government/publications/enhanced-recovery-partnership-programme> (accessed 1 Feb 2017).
3. Campbell NC, Murray E, Darbyshire J, *et al*. Designing and evaluating complex interventions to improve health care. *BMJ* 2007;334:455-9.
4. Craig P, Dieppe P, Macintyre S, *et al*. Developing and Evaluating Complex Interventions: The New Medical Research Council Guidance. *BMJ* 2008;337:979-83.

- 1  
2  
3  
4  
5  
6  
7  
8  
9  
10  
11  
12  
13  
14  
15  
16  
17  
18  
19  
20  
21  
22  
23  
24  
25  
26  
27  
28  
29  
30  
31  
32  
33  
34  
35  
36  
37  
38  
39  
40  
41  
42  
43  
44  
45  
46  
47  
48  
49  
50  
51  
52  
53  
54  
55  
56  
57  
58  
59  
60
5. Waring J, Marshall F, Bishop S, *et al*. An ethnographic study of knowledge sharing across the boundaries between care processes, services and organisations: the contributions to 'safe' hospital discharge. *Health Serv Deliv Res* 2014;2;1-160.
6. Moore G, Audrey S, Barker M, *et al*. Process evaluation in complex public health intervention studies: the need for guidance. *J Epidemiol Community Health* 2014;68:101-2.
7. Paton F, Chambers D, Wilson P, *et al*. Effectiveness and implementation of enhanced recovery after surgery programmes: a rapid evidence synthesis. *BMJ Open* 2014;4:e005015.  
doi:10.1136/bmjopen-2014-005015.
8. Bernard H, Foss M. The impact of the enhanced recovery after surgery (ERAS) programme on community nursing. *Br J Community Nurs* 2014;19:184-8.
9. Blazeby JM, Soulsby M, Winstone K, *et al*. A qualitative evaluation of patients' experiences of an enhanced recovery programme for colorectal cancer. *Colorectal Dis* 2010;12:e236-42.
10. Hunt GR, Hall GM, Murthy BV, *et al*. Early Discharge Following hip Arthroplasty: Patients' acceptance masks doubts and concerns. *Health Expect* 2009;12:130-7.
11. Husted H, Holm G. Fast track in total hip and knee arthroplasty - experiences from Hvidovre University Hospital, Denmark. *Injury* 2006;37(Suppl 5):S31-S35.
12. Norlyk A. The experience of fast track postoperative rehabilitation regimen: the patients' perspective. *Klinisk Sygepleje* 2008;22:53-63.

- 1  
2  
3  
4  
5  
6  
7  
8  
9  
10  
11  
12  
13  
14  
15  
16  
17  
18  
19  
20  
21  
22  
23  
24  
25  
26  
27  
28  
29  
30  
31  
32  
33  
34  
35  
36  
37  
38  
39  
40  
41  
42  
43  
44  
45  
46  
47  
48  
49  
50  
51  
52  
53  
54  
55  
56  
57  
58  
59  
60
13. Norlyk A, Harder I. After colonic surgery: The lived experience of participating in a fast-track programme. *Int J Qual Stud on Health Well-being* 2009;4:170-180.
14. Sibbern T, Bull Sellevold V, Steindal SA, *et al.* Patients' Experiences of Enhanced Recovery after Surgery: a systematic review of qualitative studies. *J Clin Nurs* 2017;26:1172-188.
15. Critical Skills Appraisal Programme. *CASP Qualitative Checklist*. Available from: <http://www.casp-uk.net/checklists> (accessed 30 May 2018).
16. Polit DF, Beck CT. *Nursing Research: Generating and Assessing Evidence for Nursing Practice*. Philadelphia: Wolters Kluwer/Lippincott Williams and Wilkins; 2008.
17. Graneheim UH, Lundman B. Qualitative content analysis in nursing research: concepts, procedures and measures to achieve trustworthiness. *Nurse Educ Today* 2004;24:105-12.
18. Uhrenfeldt L, Aagaard H, Hall EO, *et al.* A qualitative meta-synthesis of patients' experiences of intra- and inter-hospital transitions. *J Adv Nurs* 2013;69:1678-90.
19. Pearsall EA, Meghiji A, Pitzul KB, *et al.* A Qualitative Study to Understand the Barriers and Enablers in Implementing an Enhanced Recovery after Surgery Program. *Ann Surg* 2015;261:92-6.
20. Gotlib Conn L, McKenzie M, Pearsall EA, *et al.* Successful implementation of an enhanced recovery after surgery programme for elective colorectal surgery: a process evaluation of champions' experiences. *Implement Sci* 2015;10:99.

- 1  
2  
3 21. Lyon A, Solomon MJ, Harrison JD. A Qualitative Study Assessing the Barriers to Implementation  
4 of Enhanced Recovery after Surgery. *World J Surg* 2014;38:1374-80.  
5  
6  
7  
8  
9  
10 22. Alawadi ZM, Leal I, Phatak UR, *et al.* Facilitators and barriers of implementing enhanced  
11 recovery in colorectal surgery at a safety net hospital: A provider and patient perspective. *Surgery*  
12 2016;159:700-12.  
13  
14  
15  
16  
17  
18 23. Jeff A, Taylor C. Ward nurses' experiences of enhanced recovery after surgery: a grounded  
19 theory approach. *Gastrointestinal Nursing* 2014;12:23-31.  
20  
21  
22  
23  
24  
25 24. Wagner L, Carlslund AM, Moller C, *et al.* Patient and staff (doctors and nurses) experiences of  
26 abdominal hysterectomy in accelerated recovery programme: A qualitative study. *Dan Med Bull*  
27 2004;51:418-21.  
28  
29  
30  
31  
32  
33  
34 25. Berthelsen CB, Frederiksen K. Orchestrating care through the fast track perspective: A  
35 qualitative content analysis of the provision of individualised nursing care in orthopaedic fast-track  
36 programmes. *Int J Orthop Trauma Nurs* 2017;24:40-9.  
37  
38  
39  
40  
41  
42  
43 26. Sjetne IS, Krogstad U, Odegard, S, *et al.* Improving quality by introducing enhanced recovery  
44 after surgery in a gynaecological department: consequences for ward nursing practice. *Qual Saf*  
45 *Health Care*; 2009;18;236-40.  
46  
47  
48  
49  
50  
51  
52 27. Soo SD, Berta W, Baker GR. The role of champions in the implementation of patient safety  
53 practice change. *Healthcare Quarterly*; 2009: 12; 123-8  
54  
55  
56  
57  
58  
59  
60

- 1  
2  
3 28. Raval MV, Bentrem DJ, Eskandari MK, *et al.* The role of surgical champions in the American  
4 College of Surgeons National Surgical Quality Improvement Program – a national survey. *J. Surg Res*;  
5  
6 2011; 16: 15-25  
7  
8  
9  
10  
11  
12 29. Sartelli M, Kluger Y, Ansaloni L, *et al.* Knowledge awareness and attitude towards infection  
13 prevention and management among surgeons: identifying the surgeon champion. *World J Emerg*  
14  
15 *Surg*; 13: 37  
16  
17  
18  
19  
20  
21 30. Shaw EK, Howard J, West DR, *et al.* The role of the champion in primary care change efforts. *J Am*  
22  
23 *Board Fam Med*; 2012: 25; 676-685  
24  
25  
26  
27  
28  
29  
30 31. Tong A, Flemming K, McInnes *et al.* Enhancing transparency in reporting the synthesis of  
31 qualitative research: ENTREQ. *BMC Med Res Methodol* 2012;12:181.  
32  
33  
34  
35  
36 32. Mays, N, Pope C. Observational methods in healthcare settings. *BMJ* 1995; 311  
37  
38  
39 33. Bloor M. On the analysis of observational data: a discussion of the worth and uses of  
40 inductive techniques and respondent validation. *Sociology* 1978; 12: 545-52  
41  
42  
43  
44 34. Savage J. Ethnography and healthcare. *Br Med J* 2000; 321:1400-2  
45  
46  
47  
48  
49  
50  
51  
52  
53  
54  
55  
56  
57  
58  
59  
60

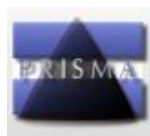

# PRISMA 2009 Flow Diagram

## Staff experiences of Enhanced Recovery after Surgery – Systematic Review of Qualitative Studies

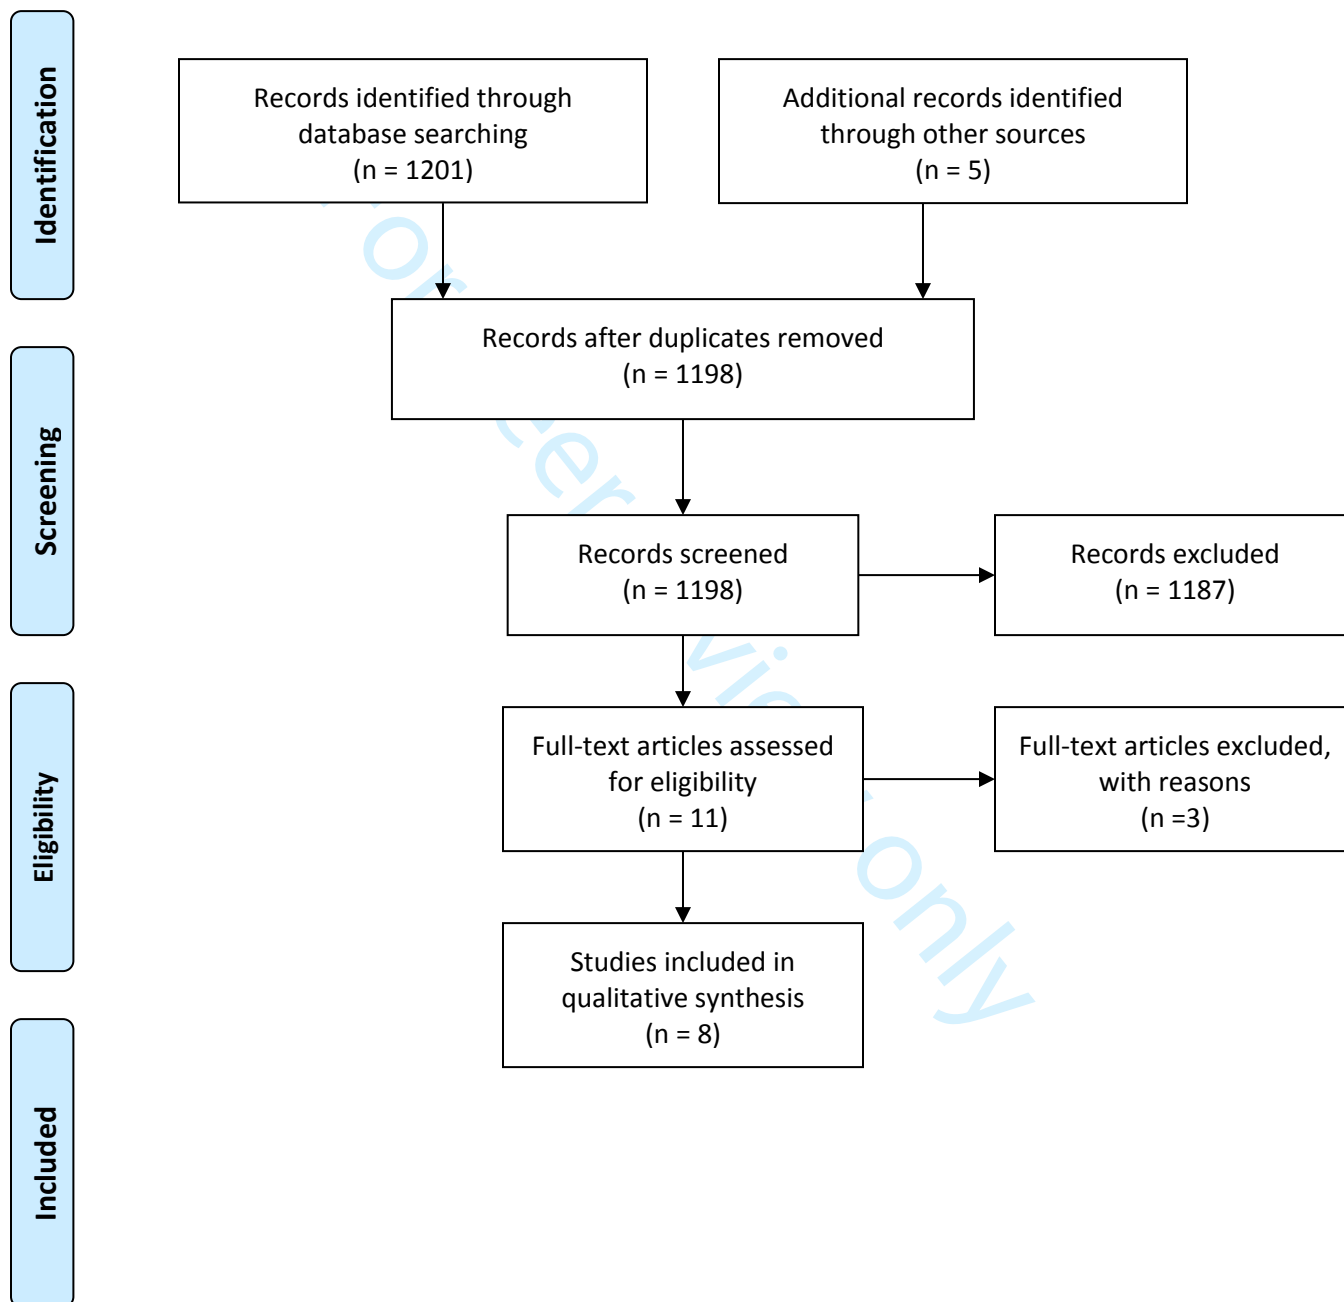

From: Moher D, Liberati A, Tetzlaff J, Altman DG, The PRISMA Group (2009). Preferred Reporting Items for Systematic Reviews and Meta-Analyses: The PRISMA Statement. PLoS Med 6(7): e1000097. doi:10.1371/journal.pmed1000097

For more information, visit [www.prisma-statement.org](http://www.prisma-statement.org).

For peer review only - <http://bmjopen.bmj.com/site/about/guidelines.xhtml>

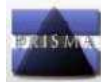

# PRISMA 2009 Checklist

| Section/topic                      | #  | Checklist item                                                                                                                                                                                                                                                                                              | Reported on page # |
|------------------------------------|----|-------------------------------------------------------------------------------------------------------------------------------------------------------------------------------------------------------------------------------------------------------------------------------------------------------------|--------------------|
| <b>TITLE</b>                       |    |                                                                                                                                                                                                                                                                                                             |                    |
| Title                              | 1  | Identify the report as a systematic review, meta-analysis, or both.                                                                                                                                                                                                                                         | 1                  |
| <b>ABSTRACT</b>                    |    |                                                                                                                                                                                                                                                                                                             |                    |
| Structured summary                 | 2  | Provide a structured summary including, as applicable: background; objectives; data sources; study eligibility criteria, participants, and interventions; study appraisal and synthesis methods; results; limitations; conclusions and implications of key findings; systematic review registration number. | 2                  |
| <b>INTRODUCTION</b>                |    |                                                                                                                                                                                                                                                                                                             |                    |
| Rationale                          | 3  | Describe the rationale for the review in the context of what is already known.                                                                                                                                                                                                                              | 4                  |
| Objectives                         | 4  | Provide an explicit statement of questions being addressed with reference to participants, interventions, comparisons, outcomes, and study design (PICOS).                                                                                                                                                  | 5                  |
| <b>METHODS</b>                     |    |                                                                                                                                                                                                                                                                                                             |                    |
| Protocol and registration          | 5  | Indicate if a review protocol exists, if and where it can be accessed (e.g., Web address), and, if available, provide registration information including registration number.                                                                                                                               | 5                  |
| Eligibility criteria               | 6  | Specify study characteristics (e.g., PICOS, length of follow-up) and report characteristics (e.g., years considered, language, publication status) used as criteria for eligibility, giving rationale.                                                                                                      | 6                  |
| Information sources                | 7  | Describe all information sources (e.g., databases with dates of coverage, contact with study authors to identify additional studies) in the search and date last searched.                                                                                                                                  | 5,6                |
| Search                             | 8  | Present full electronic search strategy for at least one database, including any limits used, such that it could be repeated.                                                                                                                                                                               | 5,6                |
| Study selection                    | 9  | State the process for selecting studies (i.e., screening, eligibility, included in systematic review, and, if applicable, included in the meta-analysis).                                                                                                                                                   | 5,6,7              |
| Data collection process            | 10 | Describe method of data extraction from reports (e.g., piloted forms, independently, in duplicate) and any processes for obtaining and confirming data from investigators.                                                                                                                                  | 6-9                |
| Data items                         | 11 | List and define all variables for which data were sought (e.g., PICOS, funding sources) and any assumptions and simplifications made.                                                                                                                                                                       | 6-9                |
| Risk of bias in individual studies | 12 | Describe methods used for assessing risk of bias of individual studies (including specification of whether this was done at the study or outcome level), and how this information is to be used in any data synthesis.                                                                                      | 6-9                |
| Summary measures                   | 13 | State the principal summary measures (e.g., risk ratio, difference in means).                                                                                                                                                                                                                               | N/A                |
| Synthesis of results               | 14 | Describe the methods of handling data and combining results of studies, if done, including measures of consistency (e.g., $I^2$ ) for each meta-analysis.                                                                                                                                                   | 6-9                |





# PRISMA 2009 Checklist

Page 1 of 2

| Section/topic                 | #  | Checklist item                                                                                                                                                                                           | Reported on page # |
|-------------------------------|----|----------------------------------------------------------------------------------------------------------------------------------------------------------------------------------------------------------|--------------------|
| Risk of bias across studies   | 15 | Specify any assessment of risk of bias that may affect the cumulative evidence (e.g., publication bias, selective reporting within studies).                                                             | N/A                |
| Additional analyses           | 16 | Describe methods of additional analyses (e.g., sensitivity or subgroup analyses, meta-regression), if done, indicating which were pre-specified.                                                         | N/A                |
| <b>RESULTS</b>                |    |                                                                                                                                                                                                          |                    |
| Study selection               | 17 | Give numbers of studies screened, assessed for eligibility, and included in the review, with reasons for exclusions at each stage, ideally with a flow diagram.                                          | 6,7                |
| Study characteristics         | 18 | For each study, present characteristics for which data were extracted (e.g., study size, PICOS, follow-up period) and provide the citations.                                                             | 10-12              |
| Risk of bias within studies   | 19 | Present data on risk of bias of each study and, if available, any outcome level assessment (see item 12).                                                                                                | N/A                |
| Results of individual studies | 20 | For all outcomes considered (benefits or harms), present, for each study: (a) simple summary data for each intervention group (b) effect estimates and confidence intervals, ideally with a forest plot. | N/A                |
| Synthesis of results          | 21 | Present results of each meta-analysis done, including confidence intervals and measures of consistency.                                                                                                  | N/A                |
| Risk of bias across studies   | 22 | Present results of any assessment of risk of bias across studies (see Item 15).                                                                                                                          | N/A                |
| Additional analysis           | 23 | Give results of additional analyses, if done (e.g., sensitivity or subgroup analyses, meta-regression [see Item 16]).                                                                                    | N/A                |
| <b>DISCUSSION</b>             |    |                                                                                                                                                                                                          |                    |
| Summary of evidence           | 24 | Summarize the main findings including the strength of evidence for each main outcome; consider their relevance to key groups (e.g., healthcare providers, users, and policy makers).                     | 19-21              |
| Limitations                   | 25 | Discuss limitations at study and outcome level (e.g., risk of bias), and at review-level (e.g., incomplete retrieval of identified research, reporting bias).                                            | 21,22              |
| Conclusions                   | 26 | Provide a general interpretation of the results in the context of other evidence, and implications for future research.                                                                                  | 21,22              |
| <b>FUNDING</b>                |    |                                                                                                                                                                                                          |                    |
| Funding                       | 27 | Describe sources of funding for the systematic review and other support (e.g., supply of data); role of funders for the systematic review.                                                               | 23                 |

From: Moher D, Liberati A, Tetzlaff J, Altman DG, The PRISMA Group (2009). Preferred Reporting Items for Systematic Reviews and Meta-Analyses: The PRISMA Statement. PLoS Med 6(7): e1000097. doi:10.1371/journal.pmed1000097

For more information, visit: [www.prisma-statement.org](http://www.prisma-statement.org).

Page 2 of 2

For peer review only - <http://bmjopen.bmj.com/site/about/guidelines.xhtml>
