# Supplementary material for: Staff experiences of enhanced recovery after surgery: systematic review of qualitative studies
Source: PubMed Central journal article supplement (PMC6377558; doi:10.1136/bmjopen-2018-022259), 2019-02-12
Supplement: bmjopen-2018-022259supp001.pdf [file bmjopen-2018-022259supp001.pdf]

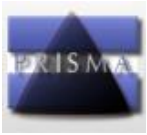

# PRISMA 2009 Flow Diagram

## Staff experiences of Enhanced Recovery after Surgery – Systematic Review of Qualitative Studies

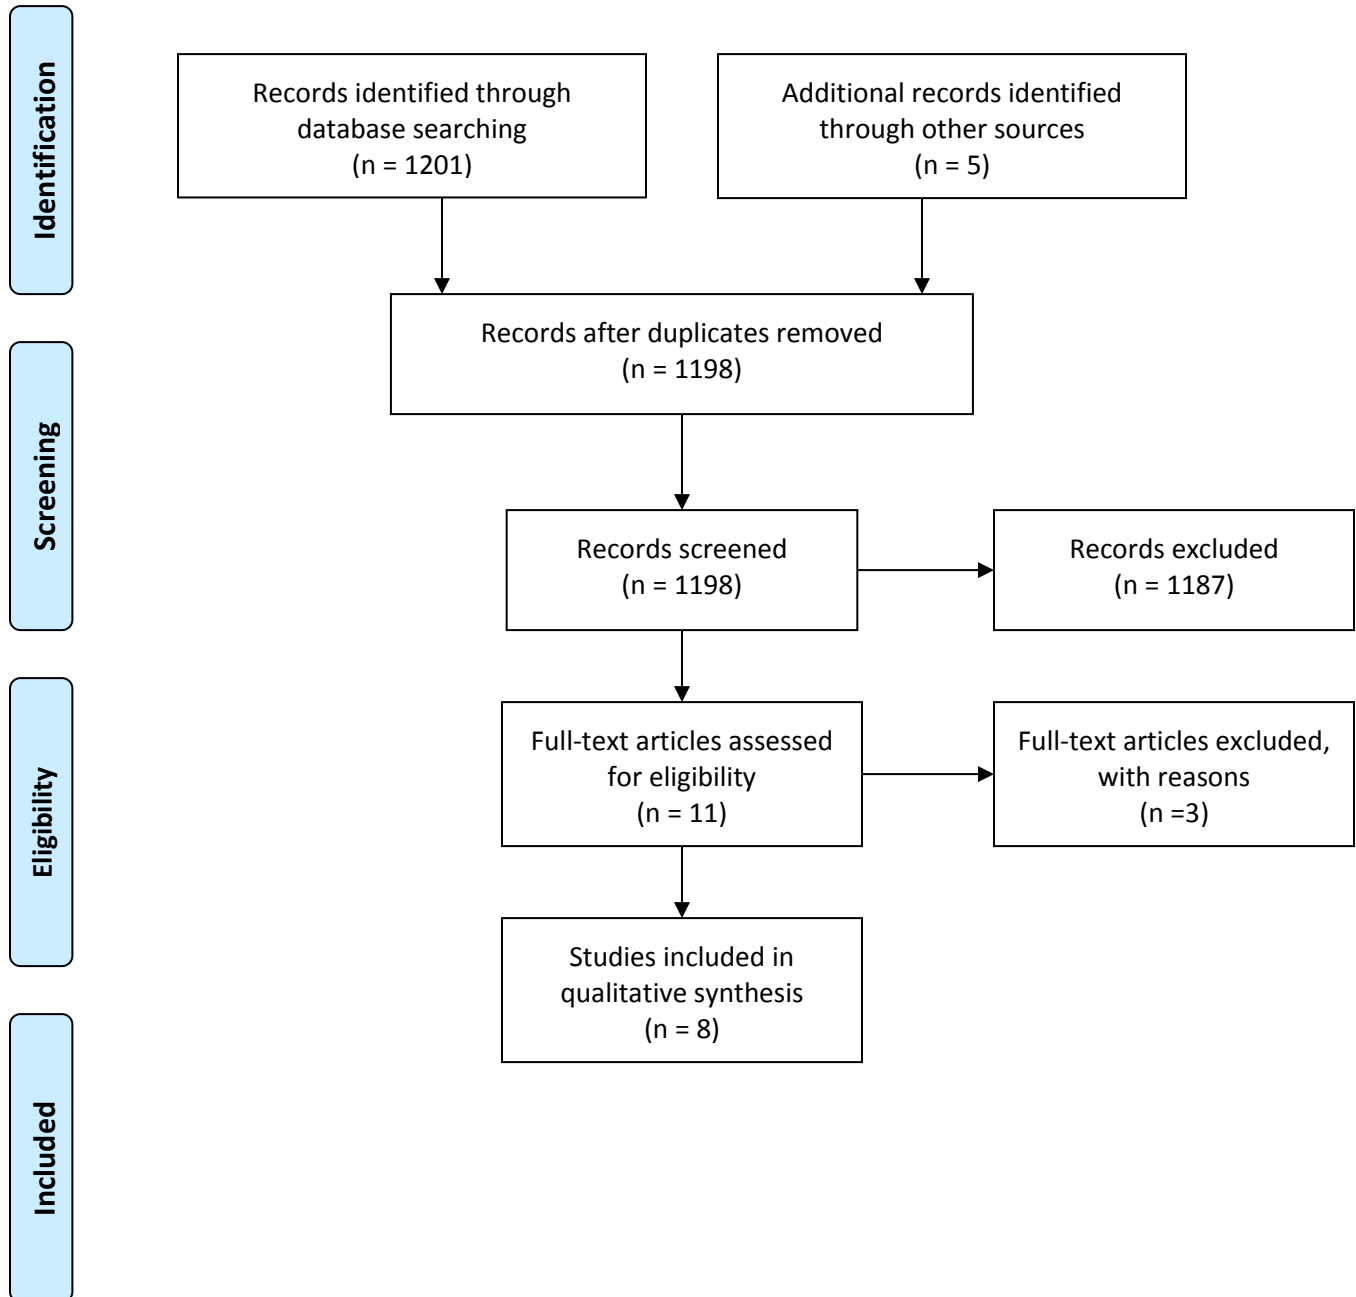

From: Moher D, Liberati A, Tetzlaff J, Altman DG, The PRISMA Group (2009). Preferred Reporting Items for Systematic Reviews and Meta-Analyses: The PRISMA Statement. PLoS Med 6(7): e1000097. doi:10.1371/journal.pmed1000097

For more information, visit [www.prisma-statement.org](http://www.prisma-statement.org).
